# Supplementary material for: Activator-free single-component Co(i)-catalysts for regio- and enantioselective heterodimerization and hydroacylation reactions of 1,3-dienes. New reduction procedures for synthesis of [L]Co(i)-complexes and comparison to in situ generated catalysts
Source: Royal Society of Chemistry journal article supplement (doi:10.1039/d2dt01484j), 2022-01-01
Supplement: d2dt01484j1.pdf [file d2dt01484j1.pdf]

## SUPPORTING INFORMATION

### Activator-Free Single-Component Co(I)-Catalysts for Regio- and Enantioselective Heterodimerization and Hydroacylation Reactions of 1,3-Dienes. New Reduction Procedures for Synthesis of [L]Co(I)-Complexes and Comparison to *in-situ* Generated Catalysts

Mahesh M. Parsutkar, Curtis E. Moore, and T. V. RajanBabu\*

Department of Chemistry and Biochemistry, The Ohio State University, 100 West 18th Avenue,  
Columbus, OHIO 43210, USA

[rajanbabu.1@osu.edu](mailto:rajanbabu.1@osu.edu)

#### Table of Contents

|                                                                                                                                                                            |     |
|----------------------------------------------------------------------------------------------------------------------------------------------------------------------------|-----|
| General Methods .....                                                                                                                                                      | S4  |
| Preparation of Organic Reductant via Reductive Silylation .....                                                                                                            | S5  |
| Preparation of Cobalt(II)-Complexes.....                                                                                                                                   | S7  |
| Preparation of Cobalt(I)-Complexes.....                                                                                                                                    | S7  |
| Synthesis of [(dppp)(Cl)Co[μ-(dppp)]Co(Cl)(dppp)] (12) by using 1,4-bis(trimethylsilyl)-1,4-dihydropyrazine .....                                                          | S7  |
| Synthesis of [(dppp)(Cl)Co[μ-(dppp)]Co(Cl)(dppp)] (12) by using Li <sub>3</sub> N .....                                                                                    | S8  |
| Synthesis of [(dppe)(Cl)Co[μ-(dppe)]Co(Cl)(dppe)] (13) .....                                                                                                               | S9  |
| Synthesis of [(S,S)-(BDPP)(Cl)Co[μ-[(S,S)-(BDPP)]]Co(Cl)(S,S)-(BDPP)] (14) .....                                                                                           | S10 |
| Synthesis of {[( <i>R,R</i> )-QuinoxP*]cobalt(μ-Br)} <sub>2</sub> (18) .....                                                                                               | S11 |
| Synthesis of {[( <i>S,S</i> )-Ph-BPE]cobalt(μ-Br)} <sub>2</sub> (19) .....                                                                                                 | S12 |
| Synthesis of {[( <i>R,R</i> )- <i>i</i> -Pr-DuPhos]cobalt(μ-Cl)} <sub>2</sub> (20) <sup>4</sup> .....                                                                      | S14 |
| Synthesis of [bis(N-aryliminoethyl-κN,N')pyridine-κN]CoCl (22).....                                                                                                        | S15 |
| Attempts towards the synthesis of Co(0)-Complexes.....                                                                                                                     | S16 |
| Preparation of Cationic Cobalt(I) Complexes.....                                                                                                                           | S17 |
| {[( <i>R,R</i> )-QuinoxP]cobalt(η <sup>6</sup> -C <sub>6</sub> D <sub>6</sub> )} <sup>+</sup> [BARF] <sup>-</sup> (23) .....                                               | S17 |
| UV-Vis Spectroscopy of the Co(II) and Co(I) complexes.....                                                                                                                 | S19 |
| Figure S1. UV-Vis Spectra of 18, 19, and 20; Each of them showing two characteristic peaks in visible region (which are the characteristic for d <sup>8</sup> system)..... | S19 |
| Figure S2. UV-Vis Spectra for relative rate of reduction; This study clearly shows that 11a is much better reductant as compared to Zn.....                                | S20 |
| Figure S3. Sensitivity of the Co(I) complexes to oxidation. UV-Vis spectra of 22 while expose to air.....                                                                  | S20 |

|                                                                                                                                                                                                                                   |     |
|-----------------------------------------------------------------------------------------------------------------------------------------------------------------------------------------------------------------------------------|-----|
| Table S1. Effect of counter ion on the rate of heterodimerization: The striking activator effect: ZnBr <sub>2</sub> vs NaBARF .....                                                                                               | S21 |
| General procedures for catalytic reactions.....                                                                                                                                                                                   | S22 |
| Procedure A1. Typical procedure for checking the viability of reducing agents via hydrovinylation of linear diene [( <i>E</i> )-1,3-nonadiene].....                                                                               | S22 |
| Table S2: Optimization of unconventional reducing agents via Co(I)-catalyzed hydrovinylation of diene.....                                                                                                                        | S23 |
| Procedure A2. Typical procedure for using lithium nitride as a reductant for Co(II) in heterodimerization of 1,3-diene and methyl acrylate.....                                                                                   | S23 |
| Table S3: Optimization of reaction conditions for heterodimerization of diene and methyl acrylate: Li <sub>3</sub> N as a reducing agent.....                                                                                     | S24 |
| Procedure A3. Typical procedure for in situ generation of metal complex for heterodimerization.....                                                                                                                               | S24 |
| Procedure A4. Typical procedure for heterodimerization of linear diene with methyl acrylate .....                                                                                                                                 | S25 |
| B1. Typical procedure for hydrovinylation of linear diene using isolated Co(I) complex 12. <sup>7,8</sup>                                                                                                                         | S26 |
| Figure S4: Hydrovinylation of linear diene using isolated Co(I) complex 12 .....                                                                                                                                                  | S26 |
| Procedure B2. Use of isolated Co(I) complex (18) for heterodimerization of linear diene with methyl acrylate .....                                                                                                                | S27 |
| Procedure B3. Use of isolated {[ <i>(R,R)</i> -QuinoxP]Co(I)( $\eta^6$ -C <sub>6</sub> D <sub>6</sub> )}+[BARF] <sup>-</sup> (23) for heterodimerization of linear diene with methyl acrylate .....                               | S28 |
| Procedure C. Use of isolated {[ <i>(R,R)</i> -iPr-DuPhos]Co(I)- $\eta^4$ -(2,3-dimethylbutadiene) }+[BARF] <sup>-</sup> (25) for hydroacylation of isoprene/2-siloxy 1,3-diene.....                                               | S29 |
| Table S4 . Activator-free, single-component (entries 1 and 5) and in situ generated [Co] <sup>+</sup> -catalysts for hydroacylation of isoprene and 2-trimethylsilyloxy-1,3-butadiene <sup>a</sup> .....                          | S30 |
| Procedure D1. Use of isolated {[ <i>(R,R)</i> -iPr-DuPhos]Co(I)- $\eta^4$ -(2,3-dimethylbutadiene) }+[BARF] <sup>-</sup> (25) for hydroboration of 2,3-dimethylbuta-1,3-diene .....                                               | S31 |
| Procedure D2. Use of in-situ generated Co(I) complex for hydroboration of 2,3-dimethylbuta-1,3-diene.....                                                                                                                         | S31 |
| Table S5: Catalytic activity of single-component catalyst {[ <i>(R,R)</i> -iPr-DuPhos]cobalt- $\eta^4$ -(2,3-dimethylbutadiene)} <sup>+</sup> [BARF] <sup>-</sup> (25) in an asymmetric hydroboration reaction <sup>a</sup> ..... | S33 |
| References.....                                                                                                                                                                                                                   | S33 |
| X-Ray Crystallographic Analysis of Single-State Crystal Structures of Neutral Co(I)-Complexes and Cationic Co(I)-Complexes .....                                                                                                  | S34 |
| Table S6 for [(dppp)(Cl)Co[ $\mu$ -(dppp)]Co(Cl)(dppp)] (12) .....                                                                                                                                                                | S35 |
| Table S7 for [(dppe)(Cl)Co[ $\mu$ -(dppe)]Co(Cl)(dppe)] (13) .....                                                                                                                                                                | S39 |
| Table S8 for {[ <i>(R,R)</i> -QuinoxP*]cobalt(I)( $\mu$ -Br)} <sub>2</sub> (18).....                                                                                                                                              | S43 |

|                                                                                                                            |     |
|----------------------------------------------------------------------------------------------------------------------------|-----|
| Table S9 for $\{[(S,S)\text{-Ph-BPE}]\text{cobalt(I)}(\mu\text{-Br})\}_2$ (19) .....                                       | S47 |
| Table S10 for $[\text{bis}(N\text{-aryliminoethyl-}\kappa\text{N,N}')\text{pyridine-}\kappa\text{N}]\text{CoCl}$ (22)..... | S51 |
| Table S11 for $\{[(R,R)\text{-QuinoxP}]\text{cobalt(I)}(\eta^6\text{-C}_6\text{D}_6)\}^+[\text{BArF}]^-$ (23) .....        | S55 |
| $^1\text{H}$ , $^{13}\text{C}$ , $^{19}\text{F}$ and $^{31}\text{P}$ NMRs of key compounds .....                           | S56 |
| GC and CSP-GC traces for catalytic reactions .....                                                                         | S75 |

## General Methods

All manipulations of moisture- and oxygen-sensitive materials were conducted using standard Schlenk technique under an argon atmosphere or in a glovebox under nitrogen atmosphere maintained at <5 ppm O<sub>2</sub>. The Schlenk line was equipped with a vacuum pump maintained between 0.2- and 0.01-mm Hg for all evacuation and drying of air sensitive compounds. All glassware was cleaned by soaking in a base bath overnight, rinsing with water, then soaking in an acid bath (1 h), then water again and finally acetone, then dried in an oven kept at 160 °C overnight. Glass vials used for reactions were purchased from VWR (8 mL, 17 x 60 mm [O.D. x H], screw-thread sample vials, PTFE-faced silicone septa), the caps were dried in a desiccator overnight while the vials were dried in an oven at 140 °C for 24 h before transferring into the glovebox. Gas chromatographic analysis of reaction mixtures was done on an Agilent 6850 Network G.C. equipped with an HP-1 methyl siloxane column (30 m, 0.32 mm I.D, 0.25 μm), H<sub>2</sub> carrier gas, FID at 300 °C or an HP 5890 GC equipped with HP-5MS column (30 m, 0.32 mm I.D, 0.25 μm) and hydrogen as carrier gas with FID-detector at 250 °C. GC-MSD analysis was performed on a 6850 GC-5975 MSD equipped with an EI-ionizer. Enantiomeric ratios of chiral compounds were determined by chiral gas chromatographic analyses which were performed on an Agilent 7850 A equipped with a cyclosil-B column, hydrogen carrier gas, using an FID detector at 250°C. Proton, fluorine, and phosphorous nuclear magnetic resonance spectra (<sup>1</sup>H, <sup>19</sup>F and <sup>31</sup>P NMR) were recorded on a Bruker Avance III HD Ascend 600 MHz or 400 MHz. Solvent resonance was used as internal standard (<sup>1</sup>H NMR, CDCl<sub>3</sub> at 7.26 ppm, C<sub>6</sub>D<sub>6</sub> at 7.16 ppm, <sup>13</sup>C NMR, CDCl<sub>3</sub> at 77.16 ppm, C<sub>6</sub>D<sub>6</sub> at 128.06 ppm). Solution state effective magnetic moment was obtained by Evans method (sealed capillary half-filled with 2% CH<sub>2</sub>Cl<sub>2</sub> in CD<sub>2</sub>Cl<sub>2</sub> was inserted in NMR-tube and <sup>1</sup>H NMR spectrum of given complex was recorded in CD<sub>2</sub>Cl<sub>2</sub>).

Methylene chloride was distilled over  $\text{CaH}_2$  and stored in the glovebox over activated 4Å molecular sieves or used for reactions out of the box when freshly distilled.  $\text{Et}_2\text{O}$ , THF, and hexanes were distilled and stored over molecular sieves for prolonged use in the glovebox. Activated zinc dust was prepared by washing with dilute aqueous HCl (1 – 2 N), washing with distilled water several times, and finally with copious amounts of acetone and the resulting solid transferred into a Schlenk flask and all volatiles removed under vacuum. The solid was further dried under vacuum at ca. 90 °C for at least 12 h, then allowed to cool to ambient temperature and transferred into the glovebox. Zinc dust for reactions were prepared by taking chunks of activated zinc and making a powder using a mortar and pestle inside the box. Sodium *tetrakis*-[3,5 *bis*(trifluoromethyl)phenyl]borate (NaBARF) was prepared using reported procedure.<sup>1</sup> All the ligands were obtained from commercial sources.

The single crystal X-ray diffraction studies were carried out on a Nonius Kappa diffractometer equipped with a Bruker APEX-II CCD and Mo  $K_\alpha$  radiation ( $\lambda = 0.71073 \text{ \AA}$ ). A desired single crystal suitable for X-ray diffraction was coated with polytoluene oil in a glovebox and was then quickly transferred and mounted on a MiTeGen Micromount with CHRISTO-LUBE MCG 1024 oil. Data were collected in a nitrogen gas stream at 100(2) K using  $\phi$  and  $\omega$  scans. The data were integrated using the Bruker SAINT software program and scaled using the SADABS software program. Solution by direct methods (SHELXT) produced a complete phasing model consistent with the proposed structure.

### **Preparation of Organic Reductant via Reductive Silylation**

All reducing agents were synthesized from commercially available starting materials by reported methods with some modification.<sup>2</sup>

#### **1,4-*Bis*(trimethylsilyl)-1,4-dihydropyrazine (11a)**

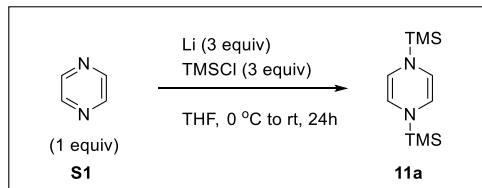

At 0 °C, solution of Pyrazine (5 g, 62.5 mmol) in THF (20 mL) was added dropwise to a mixture of Li (3 equiv., 187.5 mmol, 1.3 g), TMSCl (3 equiv., 187.5 mmol, 24.8 mL ) and THF (20 mL) over a period of 1 h. The resulting mixture allowed to come to room temperature and was stirred for 24 h at rt. Upon completion of reaction, the unreacted Li and precipitated LiCl were filtered off under inert atmosphere inside N<sub>2</sub>-filled the glovebox. The filtrate was evacuated under high vacuum and solid yellow residue was recrystallized from diethyl ether at -35 °C to obtain the pure titled compound as yellow needles (11.6 g, 82% yield).

<sup>1</sup>H NMR (600 MHz, C<sub>6</sub>D<sub>6</sub>): δ 4.70 (s, 4H), -0.03 (s, 18H); <sup>13</sup>C NMR (150 MHz, C<sub>6</sub>D<sub>6</sub>): δ 115.5 (4xC), -1.7(6xC).

### 2,3,5,6-Tetramethyl-1,4-bis(trimethylsilyl)-1,4-dihydropyrazine (11b)

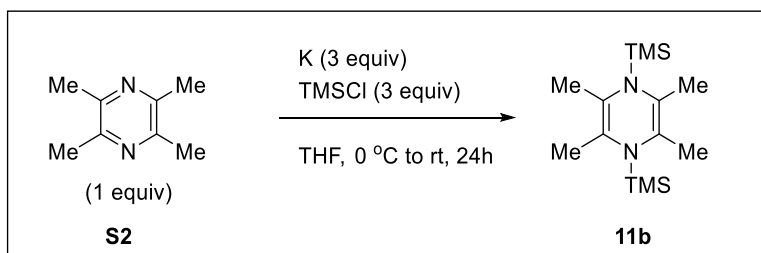

At 0 °C, a solution of 2,3,5,6-tetramethylpyrazine (1g, 7.34 mmol) in THF (10 mL) was added dropwise to a mixture of K (0.86 g, 22 mmol), TMSCl (3 equiv., 22 mmol, 2.8 mL) and THF (10 mL) over a period of 30 min. The resulting mixture allowed to come to room temperature and was stirred for 24 h at rt. Upon completion of reaction, the unreacted K and precipitated KCl were filtered off under inert atmosphere inside N<sub>2</sub>-filled the glovebox. The filtrate was evacuated

under high vacuum and solid residue was sublimed by using bulb-to-bulb distillation set up under reduced pressure to afford pure titled compound as a white solid (1.5 g, 72% yield).

$^1\text{H NMR}$  (400 MHz,  $\text{C}_6\text{D}_6$ ):  $\delta$  1.69 (s, 12H), 0.23 (s, 18H);  $^{13}\text{C NMR}$  (150 MHz,  $\text{C}_6\text{D}_6$ ):  $\delta$  127.0 (4xC), 19.1 (4xC), 1.8 (6xC).

### Preparation of Cobalt(II)-Complexes

All cobalt(II)-complexes were prepared by following our previously reported procedures:<sup>3</sup> in the glovebox, anhydrous  $\text{CoX}_2$  (0.95 eq) was dissolved in dry distilled THF. In another flask, the ligand (1.0 eq) was dissolved in dry distilled THF and added slowly to a stirring solution of the  $\text{CoX}_2$ . After the addition, the resultant mixture was stirred overnight (18 - 24 h), after which the complex may be precipitated. Stirring was stopped and hexanes added to the mixture, shaken thoroughly, and allowed to sit for ~ 10 min. The supernatant was decanted, and the resultant precipitate washed with diethyl ether until the supernatant was almost colorless. Solvent was stripped and the solid dried under high vacuum (~0.1 mm Hg) for 12 to 24 h to afford desired complex.

### Preparation of Cobalt(I)-Complexes

#### Synthesis of $[(\text{dppp})(\text{Cl})\text{Co}[\mu-(\text{dppp})]\text{Co}(\text{Cl})(\text{dppp})]$ (**12**) by using 1,4-bis(trimethylsilyl)-1,4-dihydropyrazine

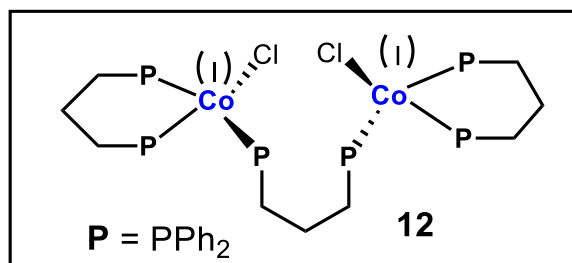

In the glovebox, a 25-mL Schlenk flask was charged with a magnetic stir bar, anhydrous  $\text{CoCl}_2$  (200 mg, 1.54 mmol, 1 equiv.) and dry freshly distilled THF (0.5 M). The resulting mixture was stirred until all the  $\text{CoCl}_2$  dissolved to afford a homogenous solution. In another flask, the ligand, dppp (992 mg, 2.38 mmol, 1.55 equiv.) was dissolved in dry distilled THF (0.5 M) and added slowly to a stirring solution of the  $\text{CoCl}_2$ . After

the addition, the resultant blue mixture was stirred for 15 minutes followed by the addition of 1,4-bis(trimethylsilyl)-1,4-dihydropyrazine (696 mg, 3.08 mmol, 2 equiv.). Upon which the color changed from blue to green. The resulting green solution stirred overnight. Stirring was stopped and solvent was stripped, washed with hexanes (1-2 mL), and the solid dried under high vacuum (~0.1 mm Hg) for 2-3 h to afford desired crude complex. The crude complex thus obtained was then dissolved in minimum amount of THF and filtered inside the glovebox. To the filtrate was then diffused hexanes (by slow evaporation of hexane into a THF solution placed in an atmosphere of hexane) to afford the green crystals (958 mg, 87% yield). The green crystal was then characterized by X-ray Crystallography (CCDC # 1873380). Solution state effective magnetic moment  $\mu_{\text{eff}}$  (298 K) = 4.57 B.M.

**$^1\text{H}$  NMR (600 MHz,  $\text{CD}_2\text{Cl}_2$ ):**  $\delta$  17.54 ( $\Delta_{1/2}$  = 94 Hz), 15.47 ( $\Delta_{1/2}$  = 11 Hz), 14.93 ( $\Delta_{1/2}$  = 154 Hz), 14.46 ( $\Delta_{1/2}$  = 120 Hz), 11.15 ( $\Delta_{1/2}$  = 75 Hz), 10.16 ( $\Delta_{1/2}$  = 149 Hz), 7.49 ( $\Delta_{1/2}$  = 87 Hz), 7.41 ( $\Delta_{1/2}$  = 69 Hz), 3.68 ( $\Delta_{1/2}$  = 22 Hz), 3.28 ( $\Delta_{1/2}$  = 54 Hz), 2.79 ( $\Delta_{1/2}$  = 34 Hz), 2.43 ( $\Delta_{1/2}$  = 80 Hz), 1.82 ( $\Delta_{1/2}$  = 22 Hz), 1.27 ( $\Delta_{1/2}$  = 74 Hz), 0.13 ( $\Delta_{1/2}$  = 29 Hz), 0.09 ( $\Delta_{1/2}$  = 20 Hz), -3.94 ( $\Delta_{1/2}$  = 111 Hz), -4.95 ( $\Delta_{1/2}$  = 56 Hz), -18.70 ( $\Delta_{1/2}$  = 6 Hz).

### Synthesis of $[(\text{dppp})(\text{Cl})\text{Co}[\mu-(\text{dppp})]\text{Co}(\text{Cl})(\text{dppp})]$ (12) by using $\text{Li}_3\text{N}$

By following the same procedure as above with modification of reducing agent, it is prepared as follows:

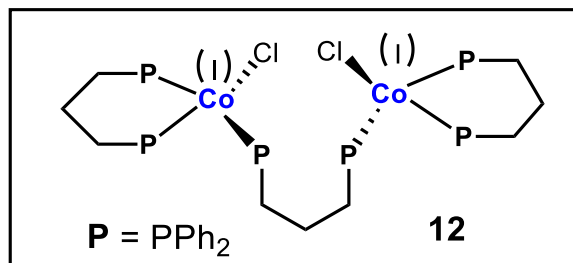

In the glovebox, a 25-mL Schlenk flask was charged with a magnetic stir bar, anhydrous  $\text{CoCl}_2$  (100 mg, 0.77 mmol, 1 equiv.) and dry freshly distilled THF (0.5 M). The resulting mixture was stirred until all the  $\text{CoCl}_2$  dissolved to

afford a homogenous solution. In another flask, the ligand, dppp (496mg, 1.19 mmol, 1.55



equiv.) was dissolved in dry distilled THF (0.5 M) and added slowly to a stirring solution of the  $\text{CoCl}_2$ . After the addition, the resultant blue mixture was stirred for 15 minutes followed by the addition of  $\text{Li}_3\text{N}$  (14 mg, 0.4 mmol, 0.52 equiv.), upon which the color changed from blue to green. The resulting green solution stirred overnight. Stirring was stopped and mixture was filtered out with frit funnel over celite. The resulting filtrate was stripped, washed with hexanes (1-2 mL), and the solid dried under high vacuum ( $\sim 0.1$  mm Hg) for 2-3 h to afford desired crude complex (545 mg, 77% yield). Some portion of the crude complex was then dissolved in minimum amount of THF and filtered inside the glovebox. To the filtrate was then diffused hexanes (by slow evaporation of hexane into a THF solution placed in an atmosphere of hexane) to afford the green crystals. The green crystal was then characterized by X-ray Crystallography. This crystal structure has been previously reported by our group.<sup>3</sup>

The crystal was an olive-green rectangular rod. All work was done at 150 K. The initial unit cell was determined to be primitive triclinic with cell constants of  $a = 21.25$  Ang.,  $b = 21.49$ ,  $c = 23.69$ ,  $\alpha = 66.38$  deg.,  $\beta = 65.92$  deg., and  $\gamma = 71.77$  deg. Since this cell matches that for our previously determined structure of the same compound (CCDC # 1873380), no data collection was done.

### Synthesis of $[(\text{dppe})(\text{Cl})\text{Co}[\mu\text{-(dppe)}]\text{Co}(\text{Cl})(\text{dppe})]$ (13)

In the glovebox, a 20-mL scintillation vial was charged with a magnetic stir bar, anhydrous  $\text{CoCl}_2$

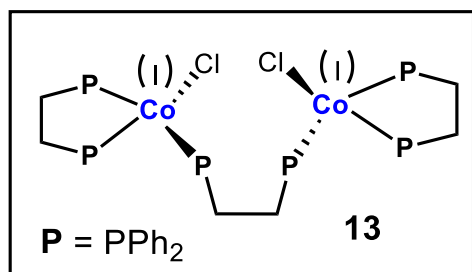

(31 mg, 0.24 mmol, 1 equiv.) and dry freshly distilled THF (1 mL). The resulting mixture was stirred until all the  $\text{CoCl}_2$  dissolved to afford a homogenous solution. In another vial, the ligand, dppe (147 mg, 0.37 mmol, 1.55 equiv.) was dissolved in dry distilled THF (3 mL) and

added slowly to a stirring solution of the  $\text{CoCl}_2$ . After the addition, the resultant mixture was stirred for 15 minutes followed by the addition of 1,4-bis(trimethylsilyl)-1,4-dihydropyrazine (107

mg, 0.48 mmol, 2 equiv.) upon which the color changed from green to brownish yellow. The resulting brownish yellow solution stirred for 6 h. Stirring was stopped, solvent was stripped, washed with hexanes (1-2 mL), and the solid dried under high vacuum (~0.1 mm Hg) for 2-3 h to afford desired crude complex (crude 80% yield). The crude complex thus obtained was then dissolved in minimum amount of THF and filtered inside the glovebox. To the filtrate was then diffused hexanes (by slow evaporation of hexane into a THF solution placed in an atmosphere of hexane) to afford the yellowish green crystals (79 mg, 48% yield). The green crystal was then characterized by X-ray Crystallography (CCDC # 1966496). Solution state effective magnetic moment  $\mu_{\text{eff}}$  (301 K) = 3.46 B.M.

**$^1\text{H NMR}$  (600 MHz,  $\text{CD}_2\text{Cl}_2$ ):**  $\delta$  13.76 ( $\Delta_{1/2}$  = 122 Hz), 11.75 ( $\Delta_{1/2}$  = 141 Hz), 10.53 ( $\Delta_{1/2}$  = 260 Hz), 3.27 ( $\Delta_{1/2}$  = 145 Hz), 2.20 ( $\Delta_{1/2}$  = 164 Hz), 1.41 ( $\Delta_{1/2}$  = 65 Hz), 0.91 ( $\Delta_{1/2}$  = 130 Hz), -4.22 ( $\Delta_{1/2}$  = 187 Hz), -5.61 ( $\Delta_{1/2}$  = 11 Hz).

#### Synthesis of [(S,S)-(BDPP)(Cl)Co][ $\mu$ -[(S,S)-(BDPP)]]Co(Cl)(S,S)-(BDPP)] (14)

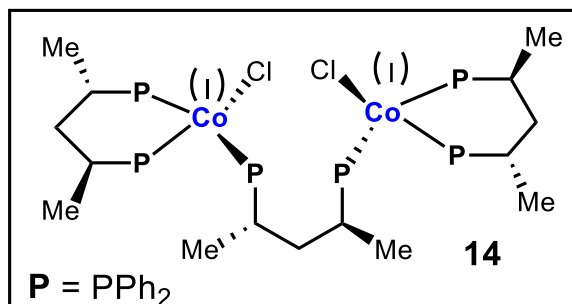

In the glovebox, a 20-mL scintillation vial was charged with a magnetic stir bar, anhydrous  $\text{CoCl}_2$  (50 mg, 0.38 mmol, 1 equiv) and dry freshly distilled THF (0.5 M). The resulting mixture was stirred until all the  $\text{CoCl}_2$  dissolved to

afford a homogenous solution. In another vial, the ligand, (S,S)-BDPP (263 mg, 0.6 mmol, 1.55 equiv.) was dissolved in dry distilled THF (0.5 M) and added slowly to a stirring solution of the  $\text{CoCl}_2$ . After the addition, the resultant blue mixture was stirred for 15 minutes followed by the addition of 1,4-bis(trimethylsilyl)-1,4-dihydropyrazine (174 mg, 0.77 mmol, 2 equiv.). Upon which the color changed from blue to green. The resulting green solution stirred overnight. Stirring

was stopped, solvent was stripped, washed with hexanes (1-2 mL), and the solid dried under high vacuum (~0.1 mm Hg) for 2-3 h to afford desired crude complex (244 mg, 84% yield). The crude complex thus obtained was then dissolved in minimum amount of THF and filtered inside the glovebox. To the filtrate was then diffused hexanes (by slow evaporation of hexane into a THF solution placed in an atmosphere of hexane) to afford the green crystals (160 mg, 55% yield). The green crystal was then characterized by X-ray Crystallography. This crystal structure has been previously reported by our group.<sup>3</sup> Solution state effective magnetic moment  $\mu_{\text{eff}}$  (301 K) = 5.25 B.M.

**<sup>1</sup>H NMR (600 MHz, C<sub>6</sub>D<sub>6</sub>):**  $\delta$  17.55 ( $\Delta_{1/2}$  = 62 Hz), 14.13 ( $\Delta_{1/2}$  = 84 Hz), 10.74 ( $\Delta_{1/2}$  = 6 Hz), 9.93 ( $\Delta_{1/2}$  = 31 Hz), 7.82 ( $\Delta_{1/2}$  = 73 Hz), 7.76 ( $\Delta_{1/2}$  = 27 Hz), 7.47 ( $\Delta_{1/2}$  = 25 Hz), 7.39 ( $\Delta_{1/2}$  = 44 Hz), 6.72 ( $\Delta_{1/2}$  = 67 Hz), 6.40 ( $\Delta_{1/2}$  = 27 Hz), 6.21 ( $\Delta_{1/2}$  = 62 Hz), 3.57 ( $\Delta_{1/2}$  = 24 Hz), 3.42 ( $\Delta_{1/2}$  = 80 Hz), 3.08 ( $\Delta_{1/2}$  = 53 Hz), 2.99 ( $\Delta_{1/2}$  = 36 Hz), 2.91 ( $\Delta_{1/2}$  = 13 Hz), 1.91 ( $\Delta_{1/2}$  = 24 Hz), 1.41 ( $\Delta_{1/2}$  = 25 Hz), 1.22 ( $\Delta_{1/2}$  = 78 Hz), 1.03 ( $\Delta_{1/2}$  = 76 Hz), 0.95 ( $\Delta_{1/2}$  = 40 Hz), 0.89 ( $\Delta_{1/2}$  = 51 Hz), 0.12 ( $\Delta_{1/2}$  = 51 Hz), - 2.10 ( $\Delta_{1/2}$  = 4 Hz), -4.23 ( $\Delta_{1/2}$  = 6 Hz), -7.60 ( $\Delta_{1/2}$  = 4 Hz), -11.84 ( $\Delta_{1/2}$  = 4 Hz), -17.07 ( $\Delta_{1/2}$  = 9 Hz), -17.29 ( $\Delta_{1/2}$  = 4 Hz).

### Synthesis of **{[(*R,R*)-QuinoxP\*]cobalt( $\mu$ -Br)}<sub>2</sub> (**18**)**

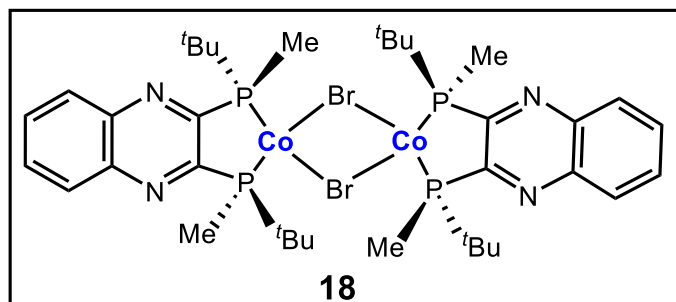

In the glovebox, a 20 mL scintillation vial was charged with a magnetic stir bar, anhydrous CoBr<sub>2</sub> (50 mg, 0.145 mmol, 1 equiv.) and dry freshly distilled THF (3 mL). The resulting mixture was stirred until all the CoBr<sub>2</sub> dissolved to afford a

homogenous solution. In another vial, the ligand, R-QuinoxP\* (50 mg, 0.145 mmol, 1.0 equiv.) was dissolved in dry distilled THF (2 mL) and added slowly to a stirring solution of the CoBr<sub>2</sub>.

After the addition, the resultant green mixture was stirred for 3 h followed by the addition of 1,4-*bis*(trimethylsilyl)-1,4-dihydropyrazine (33 mg, 0.145 mmol, 1 equiv.). Upon which the color changed from green to deep green. The resulting green solution stirred overnight. Stirring was stopped and solvent was stripped and the solid dried under high vacuum (~0.1 mm Hg) for 2 to 3 h to afford desired crude complex (65 mg, crude yield 95%). The crude complex thus obtained was then dissolved in minimum amount of hexanes and filtered inside the glovebox. The filtrate was kept at -25 °C overnight to afford the green crystals (55 mg, 80% yield). The green crystal was then characterized by X-ray Crystallography (CCDC # 1966498). Solution state effective magnetic moment  $\mu_{\text{eff}}$  (301 K) = 4.70 B.M.

**$^1\text{H}$  NMR (600 MHz,  $\text{C}_6\text{D}_6$ ):**  $\delta$  26.25 ( $\Delta_{1/2}$  = 73 Hz), 9.71 ( $\Delta_{1/2}$  = 13 Hz), 8.84 ( $\Delta_{1/2}$  = 11 Hz), 3.04 ( $\Delta_{1/2}$  = 67 Hz), 0.29 ( $\Delta_{1/2}$  = 3 Hz), 0.12 ( $\Delta_{1/2}$  = 33 Hz), 0.04 ( $\Delta_{1/2}$  = 4 Hz).

### Synthesis of $\{[(S,S)\text{-Ph-BPE}]\text{cobalt}(\mu\text{-Br})\}_2$ (**19**)

**Method A, in situ generation of the precursor Co(II) complex:** In the glovebox, a 20 mL

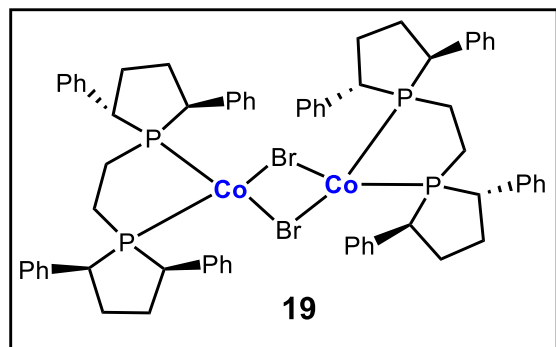

scintillation vial was charged with a magnetic stir bar, anhydrous  $\text{CoBr}_2$  (44 mg, 0.2 mmol, 1 equiv.) and dry freshly distilled THF (2 mL). The resulting mixture was stirred until all the  $\text{CoBr}_2$  dissolved to afford a homogenous solution. In another vial, the ligand, (*S,S*)-Ph-BPE (106 mg, 0.21 mmol, 1.05 equiv.) was dissolved in dry distilled THF (3 mL) and added slowly to a stirring solution of the

$\text{CoBr}_2$ . After the addition, the resultant purple mixture was stirred for 2 h followed by the addition of 1,4-*bis*(trimethylsilyl)-1,4-dihydropyrazine (45.3 mg, 0.2 mmol, 1 equiv.). Upon which the color changed from purple to green. The resulting bluish green solution stirred overnight.

Stirring was stopped and solvent was stripped, washed with hexanes (3-4 mL), and the solid dried under high vacuum (~0.1 mm Hg) for 2 to 3 h to afford desired crude complex (132 mg, yield 94%). The crude complex thus obtained was then dissolved in minimum amount of THF and filtered inside the glovebox. To the filtrate was then diffused hexanes (by slow evaporation of hexane into a THF solution placed in an atmosphere of hexane) to afford the green crystals. The green crystal was then characterized by X-ray Crystallography (CCDC # 1966499).

**Method B, Use of isolated Co(II) precursor:** In the glovebox, a 20 mL scintillation vial was charged with a magnetic stir bar, isolated (Ph-BPE)CoBr<sub>2</sub> (15 mg, 0.021 mmol, 1 equiv.) and dry freshly distilled THF (1 mL). To the resultant solution, 1,4-bis(trimethylsilyl)-1,4-dihydropyrazine (13 mg, 0.058 mmol, 2 equiv.) was added, upon which the color changed from purple to green. The resulting bluish green solution stirred overnight. Stirring was stopped and solvent was stripped, washed with hexanes (1 mL), and the solid dried under high vacuum (~0.1 mm Hg) for 2 to 3 h to afford desired crude complex (crude yield 91%). The crude complex thus obtained was then dissolved in minimum amount of THF and filtered inside the glovebox. To the filtrate was then diffused hexanes (by slow evaporation of hexane into a THF solution placed in an atmosphere of hexane) to afford the green crystals (7.9 mg, 52% yield). Solution state effective magnetic moment  $\mu_{\text{eff}}$  (301 K) = 3.85 B.M.

**<sup>1</sup>H NMR (600 MHz, C<sub>6</sub>D<sub>6</sub>):**  $\delta$  67.86( $\Delta_{1/2}$  = 33 Hz), 51.61( $\Delta_{1/2}$  = 6 Hz), 10.83( $\Delta_{1/2}$  = 107 Hz), 8.99 ( $\Delta_{1/2}$  = 4 Hz), 7.35 ( $\Delta_{1/2}$  = 22 Hz), 7.25( $\Delta_{1/2}$  = 36 Hz), 7.10 ( $\Delta_{1/2}$  = 36 Hz), 7.00 ( $\Delta_{1/2}$  = 47 Hz), 6.91 ( $\Delta_{1/2}$  = 49Hz), 4.71 ( $\Delta_{1/2}$  = 113Hz), 4.45 ( $\Delta_{1/2}$  = 6 Hz), 3.67 ( $\Delta_{1/2}$  = 33Hz), 3.57 ( $\Delta_{1/2}$  = 24 Hz), 3.33 ( $\Delta_{1/2}$  = 24 Hz), 3.32 ( $\Delta_{1/2}$  = 7 Hz), 3.23 ( $\Delta_{1/2}$  = 58 Hz), 3.00 ( $\Delta_{1/2}$  = 13 Hz), 2.99 ( $\Delta_{1/2}$  = 9 Hz), 2.98 ( $\Delta_{1/2}$  = 22Hz), 2.69 ( $\Delta_{1/2}$  = 49 Hz), 2.10 ( $\Delta_{1/2}$  = 60Hz), 1.90 ( $\Delta_{1/2}$  = 67Hz), 1.76 ( $\Delta_{1/2}$  = 44 Hz), 1.66 ( $\Delta_{1/2}$  = 7 Hz), 1.65 ( $\Delta_{1/2}$  = 9 Hz), 1.64 ( $\Delta_{1/2}$  = 7 Hz), 1.54 ( $\Delta_{1/2}$  = 82 Hz), 1.42 ( $\Delta_{1/2}$  = 29 Hz), 1.26 ( $\Delta_{1/2}$  = 7 Hz).

## Synthesis of $\{[(R,R)\text{-}i\text{Pr-DuPhos}]\text{cobalt}(\mu\text{-Cl})\}_2$ (**20**)<sup>4</sup>

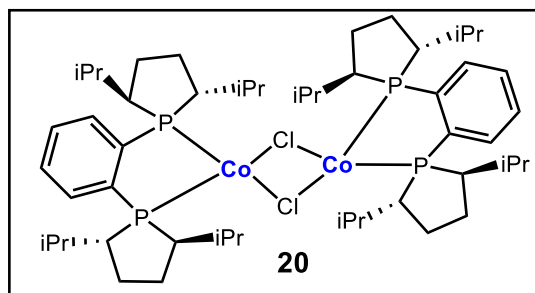

In the glovebox, a 20 mL scintillation vial was charged with a magnetic stir bar, anhydrous  $\text{CoCl}_2$  (75 mg, 0.58 mmol, 1 equiv.) and dry freshly distilled THF (5 mL). The resulting mixture was stirred until all the  $\text{CoCl}_2$  dissolved to afford a homogenous solution. In another vial, the ligand,  $i\text{Pr-DuPhos}$

(250 mg, 0.58 mmol, 1.0 equiv.) was dissolved in dry distilled THF (3 mL) and added slowly to a stirring solution of the  $\text{CoCl}_2$ . After the addition, the resultant green mixture was stirred for 2 h followed by the addition of 1,4-*bis*(trimethylsilyl)-1,4-dihydropyrazine (131 mg, 0.58 mmol, 1 equiv.), upon which the color changed from green to brownish orange. The resulting brown orange solution stirred overnight. Stirring was stopped, solvent was stripped, and the solid dried under high vacuum ( $\sim 0.1$  mm Hg) for 2 to 3 h to afford desired crude complex (280 mg, 94% yield). The crude complex thus obtained was then dissolved in minimum amount of diethyl ether and filtered inside the glovebox. The filtrate was kept at  $-25$  °C overnight to afford the brown crystals (256 mg, 86% yield). The brown crystal was then characterized by X-ray Crystallography. Solution state effective magnetic moment  $\mu_{\text{eff}}$  (301 K) = 3.93 B.M. This crystal structure has been reported in the literature by Chirik et al.<sup>4</sup>

**$^1\text{H}$  NMR (600 MHz,  $\text{C}_6\text{D}_6$ ):**  $\delta$  66.30 ( $\Delta_{1/2}$  = 38 Hz), 57.24 ( $\Delta_{1/2}$  = 51 Hz), 14.10 ( $\Delta_{1/2}$  = 18 Hz), 9.19 ( $\Delta_{1/2}$  = 24 Hz), 9.06 ( $\Delta_{1/2}$  = 9 Hz), 2.35 ( $\Delta_{1/2}$  = 31 Hz), 1.02 ( $\Delta_{1/2}$  = 25 Hz), 0.90 ( $\Delta_{1/2}$  = 11 Hz), 0.73 ( $\Delta_{1/2}$  = 18 Hz), 0.72 ( $\Delta_{1/2}$  = 35 Hz), 0.59 ( $\Delta_{1/2}$  = 53 Hz), -1.04 ( $\Delta_{1/2}$  = 44 Hz), -1.53 ( $\Delta_{1/2}$  = 25 Hz), -2.69 ( $\Delta_{1/2}$  = 45 Hz), -3.96 ( $\Delta_{1/2}$  = 45 Hz)

NMR matches with the complex reported by Chirik et al.<sup>4</sup>

## Synthesis of [bis(N-aryliminoethyl-κN,N')pyridine-κN]CoCl (22)

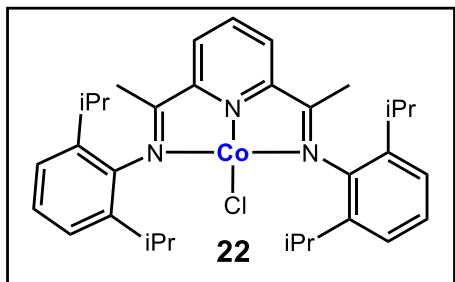

In the glovebox, a 20 mL scintillation vial was charged with a magnetic stir bar, isolated *Bis(imino)pyridyl*CoCl<sub>2</sub> (150 mg, 0.24 mmol, 1 equiv.) and dry freshly distilled THF (3 mL). To the resultant yellow solution, 1,4-*bis*(trimethylsilyl)-1,4-dihydropyrazine (30 mg, 0.132 mmol, 0.55 equiv) was added. Upon which the color changed

from yellow to purple. The resulting purple solution stirred for 3 hr. Stirring was stopped and solvent was stripped, washed with hexanes (1-2 mL), and the solid dried under high vacuum (~0.1 mm Hg) for 2 to 3 h to afford desired crude complex (133 mg, 94% yield). The crude complex thus obtained was then dissolved in minimum amount of THF and filtered inside the glovebox. To the filtrate was then diffused hexanes (by slow evaporation of hexane into a THF solution placed in an atmosphere of hexane) and kept at -25 °C overnight to afford the purple crystals (115 mg, 81% yield). The purple crystal was then characterized by X-ray Crystallography (CCDC # 1966500).

**<sup>1</sup>H NMR (600 MHz, C<sub>6</sub>D<sub>6</sub>):** δ 9.56 (Δ<sub>1/2</sub> = 27 Hz), 8.49 (Δ<sub>1/2</sub> = 33 Hz), 8.43 (Δ<sub>1/2</sub> = 49 Hz), 7.44(Δ<sub>1/2</sub> = 25 Hz), 7.30 (Δ<sub>1/2</sub> = 22 Hz), 7.15(Δ<sub>1/2</sub> = 13 Hz), 6.93(Δ<sub>1/2</sub> = 20 Hz), 3.56(Δ<sub>1/2</sub> = 25Hz), 3.35(Δ<sub>1/2</sub> = 29 Hz), 2.91(Δ<sub>1/2</sub> = 34Hz), 2.27 (Δ<sub>1/2</sub> = 49 Hz), 1.41 (Δ<sub>1/2</sub> = 24 Hz), 1.19 (Δ<sub>1/2</sub> = 20 Hz), 1.08 (Δ<sub>1/2</sub> = 20 Hz), 0.88 (Δ<sub>1/2</sub> = 29 Hz), 0.84 (Δ<sub>1/2</sub> = 20 Hz), 0.07 (Δ<sub>1/2</sub> = 11 Hz), -1.18 (Δ<sub>1/2</sub> = 44 Hz), -8.93 (Δ<sub>1/2</sub> = 36 Hz), -17.83 (Δ<sub>1/2</sub> = 7 Hz), -18.37 (Δ<sub>1/2</sub> = 34 Hz).

**<sup>13</sup>C NMR (150 MHz, CD<sub>2</sub>Cl<sub>2</sub>):** δ 167.86, 152.56, 150.63, 140.82, 126.39, 125.82, 123.32, 115.69, 28.65, 23.54, 23.09, 21.36.

NMR matches with the complex reported by Gal et al.<sup>5</sup>

## Attempts towards the synthesis of Co(0)-Complexes

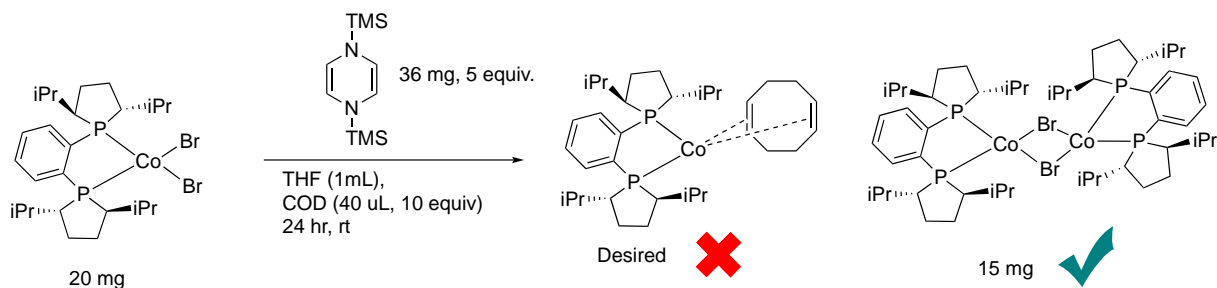

In the N<sub>2</sub>-filled glovebox, a 20 mL scintillation vial was charged with a magnetic stir bar, isolated  $(R)$ -iPr-DuPhosCoBr<sub>2</sub> (20 mg, 0.031 mmol, 1 equiv.) and 1,4-bis(trimethylsilyl)-1,4-dihydropyrazine, **11a** (36 mg, 0.16 mmol, 5 equiv.) and dry freshly distilled THF (1 mL). Upon letting it stir for ca. 2 min, 1,5-cyclooctadiene (COD) (40  $\mu$ L, 0.31 mmol, 10 equiv.) was added to the resulting solution via micro-syringe. The resulting brown solution stirred for 24 hr. Stirring was stopped, solvent was stripped, and the solid dried under high vacuum (~0.1 mm Hg) for 5 to 6 h to afford desired crude complex (15 mg, 86% yield). The <sup>1</sup>H-NMR recorded for crude solid in C<sub>6</sub>D<sub>6</sub> and it did not show any peaks corresponding to <sup>1</sup>H-NMR spectrum of previously reported  $[(R)\text{-iPr-DuPhosCo}^0(\text{COD})]$  complex by Chirik et al.<sup>4</sup> It showed the peaks analogues to  $[(R)\text{-iPr-DuPhosCo}^0(\mu\text{Cl})]_2$  which suggests that there is only formation of  $[(R)\text{-iPr-DuPhosCo}^0(\text{Br})]_2$ .

**<sup>1</sup>H NMR (600 MHz, C<sub>6</sub>D<sub>6</sub>):**  $\delta$  63.41 ( $\Delta_{1/2}$  = 107 Hz), 52.74 ( $\Delta_{1/2}$  = 164 Hz), 14.04 ( $\Delta_{1/2}$  = 27 Hz), 9.13 ( $\Delta_{1/2}$  = 7 Hz), 8.74 ( $\Delta_{1/2}$  = 27 Hz), 2.51 ( $\Delta_{1/2}$  = 38 Hz), 1.40 ( $\Delta_{1/2}$  = 23 Hz), 1.04 ( $\Delta_{1/2}$  = 11 Hz), 0.88 ( $\Delta_{1/2}$  = 0 Hz), -0.99 ( $\Delta_{1/2}$  = 61 Hz), -1.38 ( $\Delta_{1/2}$  = 38 Hz), -2.18 ( $\Delta_{1/2}$  = 65 Hz), -4.24 ( $\Delta_{1/2}$  = 137 Hz).



Using THF/MeOH solvent:

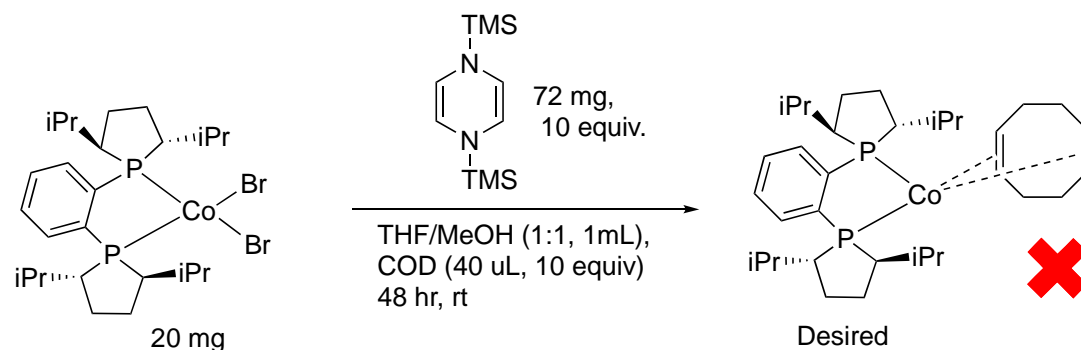

In the glovebox, a 20 mL scintillation vial was charged with a magnetic stir bar, isolated (R)-iPr-DuPhosCoBr<sub>2</sub> (20 mg, 0.031 mmol, 1 equiv.) and 1,4-bis(trimethylsilyl)-1,4-dihydropyrazine, **11a** (72 mg, 0.31 mmol, 10 equiv.), dry freshly distilled THF (0.5 mL) and anhydrous MeOH (0.5 mL). Upon letting it stir for ca. 2 min, 1,5-cyclooctadiene (40 μL, 0.31 mmol, 10 equiv.) was added to the resulting solution via micro-syringe. The resulting brown solution stirred for 48 hr. Stirring was stopped, solvent was stripped, and the solid dried under high vacuum (~0.1 mm Hg) for 5 to 6 h to afford desired crude complex (32 mg). The crude solid remains insoluble in C<sub>6</sub>D<sub>6</sub> as well as THF-D<sub>8</sub>. <sup>1</sup>H-NMR recorded for crude solid in C<sub>6</sub>D<sub>6</sub> and THF-D<sub>8</sub> only showed peak correspond to free ligand [(R)-iPr-DuPhos]. <sup>31</sup>P also showed peak corresponding to free ligand.

## Preparation of Cationic Cobalt(I) Complexes

### {[(R,R)-QuinoxP]cobalt(η<sup>6</sup>-C<sub>6</sub>D<sub>6</sub>)}<sup>+</sup> [BARF]<sup>-</sup> (**23**)

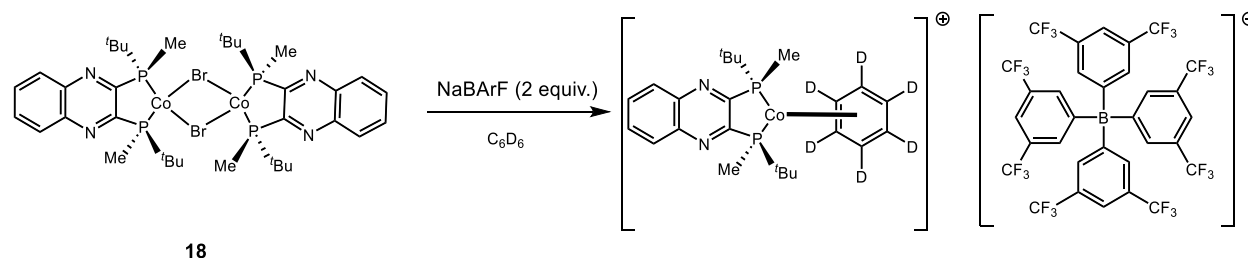

In N<sub>2</sub>-filled glovebox, 20 mL scintillation vial was charged with a magnetic stir bar, {[(*R,R*)-QuinoxP\*]cobalt( $\mu$ -Br)}<sub>2</sub> **18** (25 mg, 0.026 mmol, 1 equiv.), NaBARF(49 mg, 0.055 mmol, 2.1 equiv.), and 2 mL of C<sub>6</sub>D<sub>6</sub>. The color changed from green to purple. The resulting purple solution was stirred for 3 h at room temperature inside the glovebox. Upon letting it sit for 5 minutes, C<sub>6</sub>D<sub>6</sub> was decanted. The crude complex then washed with 3 mL of hexanes and residual solvents were stripped down to obtain purple solid **23** (55 mg, 78% yield). The saturated solution of **23** in C<sub>6</sub>D<sub>6</sub> leads to solid purple crystal at room temperature which was then characterized by X-ray crystallography (CCDC # 2016105).

**<sup>1</sup>H NMR (600 MHz, C<sub>6</sub>D<sub>6</sub>):**  $\delta$  11.45 (4H), 8.82 (2H), 8.34 (8H), 8.04 (2H), 7.84 (1H), 7.64 (4H), 7.58 (1H), 7.29 (1H), 7.03 (1H), 6.41 (1H), 5.63 (1H), 5.51 (3H), 3.57 (2H), 3.46(1H), 3.27 (2H), 3.07 (6H), 1.35 (12H), 1.21(4H), 0.89 (6H), 0.77 (1H), 0.56 (1H), 0.41 (9H), 0.29 (5H), 0.12 (7H), 0.03 (7H) ; **<sup>13</sup>C NMR (150 MHz, C<sub>6</sub>D<sub>6</sub>):**  $\delta$  162.56 (q, <sup>1</sup>J<sub>B-C</sub> = 49.6 Hz), 135.42, 133.04, 129.84, 129.78, 126.14, 124.33, 118.08, 34.98, 26.94, 26.39, 25.64; **<sup>31</sup>P NMR (243 MHz, C<sub>6</sub>D<sub>6</sub>):**  $\delta$  58.19; **<sup>19</sup>F NMR (565 MHz, C<sub>6</sub>D<sub>6</sub>):**  $\delta$  -62.05.

**<sup>1</sup>H NMR (600 MHz, CD<sub>2</sub>Cl<sub>2</sub>):**  $\delta$  14.87 (bs, 2H), 8.21 (q, *J* = 3.3 Hz, 1H), 7.95 (q, *J* = 3.3 Hz, 1H), 7.69 (bs, 8H), 7.54 (bs, 4H), 4.20-3.40 (m, 9H), 1.95 (virtual coupling, t, *J* = 5.1 Hz, 6H), 1.00 (t, *J* = 7.4 Hz, 9H) ; **<sup>13</sup>C NMR (150 MHz, CD<sub>2</sub>Cl<sub>2</sub>):**  $\delta$  162.12 (q, <sup>1</sup>J<sub>B-C</sub> = 49.8 Hz), 155.28, 135.20, 133.26, 130.40, 129.25, (q, <sup>2</sup>J<sub>C-F</sub> = 29.5 Hz), 124.99 (q, <sup>1</sup>J<sub>C-F</sub> = 272.4 Hz), 117.87, 37.55, 27.89, 27.24, 12.47; **<sup>31</sup>P NMR (243 MHz, C<sub>6</sub>D<sub>6</sub>):**  $\delta$  58.24.

Synthesis, isolation, and spectral properties of {[(*R,R*)-*i*-Pr-DuPhos]cobalt- $\eta^4$ -(2,3-dimethylbutadiene) }<sup>+</sup> [BARF]<sup>-</sup> (**25**) has been recently reported by our group.<sup>6</sup>

## UV-Vis Spectroscopy of the Co(II) and Co(I) complexes

A background of THF was taken. All the samples were made inside the N<sub>2</sub>-filled glovebox with appropriate concentration in THF and transferred to modified cuvette that allowed the preservation of air sensitive materials. The cuvette was placed in the in-situ UV- VIS and a wavelength scan was performed from 1100 nm to 190 nm.

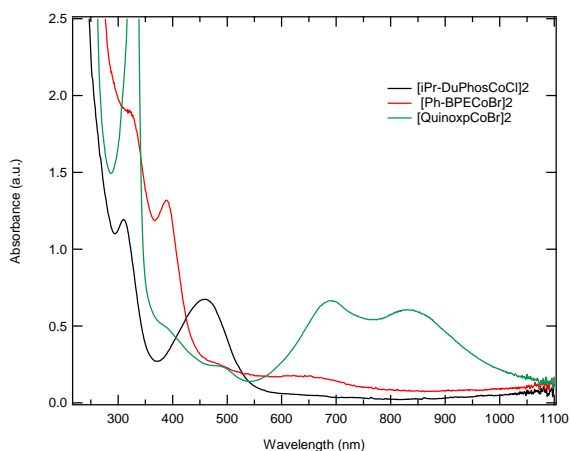

**Figure S1. UV-Vis Spectra of 18, 19, and 20;** Each of them showing two characteristic peaks in visible region (which are the characteristic for d<sup>8</sup> system).

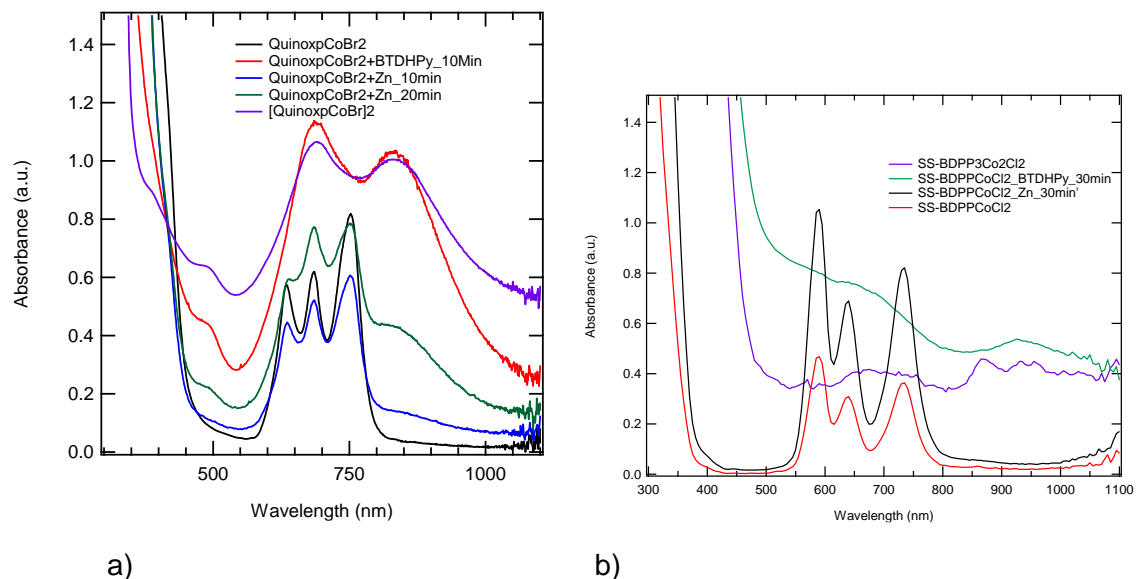

**Figure S2. UV-Vis Spectra for relative rate of reduction;** This study clearly shows that 11a is much better reductant as compared to Zn.

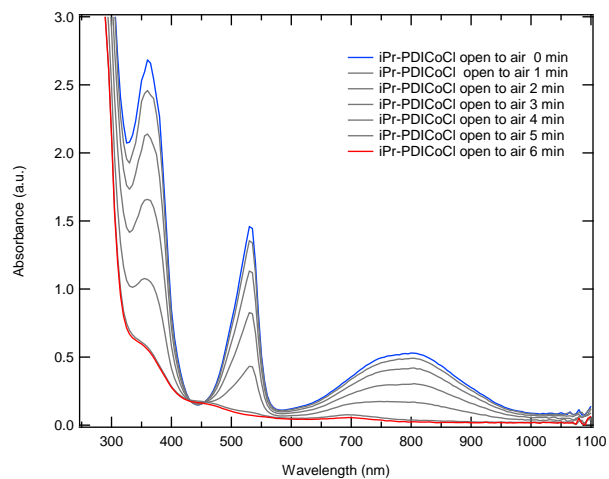

**Figure S3. Sensitivity of the Co(I) complexes to oxidation.** UV-Vis spectra of 22 while expose to air

**Table S1.** Effect of counter ion on the rate of heterodimerization: ZnBr<sub>2</sub> vs NaBArF

|                                | 0 min<br>(% conversion) | 5 min<br>(% conversion) | 15 min<br>(% conversion) | 25 min<br>(% conversion) |
|--------------------------------|-------------------------|-------------------------|--------------------------|--------------------------|
| ZnBr <sub>2</sub><br>(average) | 0.0 ± 0.0               | 0.0 ± 0.0               | 0.0 ± 0.0                | 5.3 ± 3.1                |
| NaBArF (average)               | 0.0 ± 0.0               | 38.0 ± 7.3              | 70.0 ± 4.3               | 89.3 ± 3.3               |
| ZnBr <sub>2</sub> (trial 1)    | 0.0                     | 0.0                     | 0.0                      | 1.0                      |
| ZnBr <sub>2</sub> (trial 2)    | 0.0                     | 0.0                     | 0.0                      | 7.0                      |
| ZnBr <sub>2</sub> (trial 3)    | 0.0                     | 0.0                     | 0.0                      | 8.0                      |
| NaBArF (trial 1)               | 0.0                     | 48.0                    | 68.0                     | 90.0                     |
| NaBArF (trial 2)               | 0.0                     | 31.0                    | 66.0                     | 85.0                     |
| NaBArF (trial 3)               | 0.0                     | 35.0                    | 76.0                     | 93.0                     |

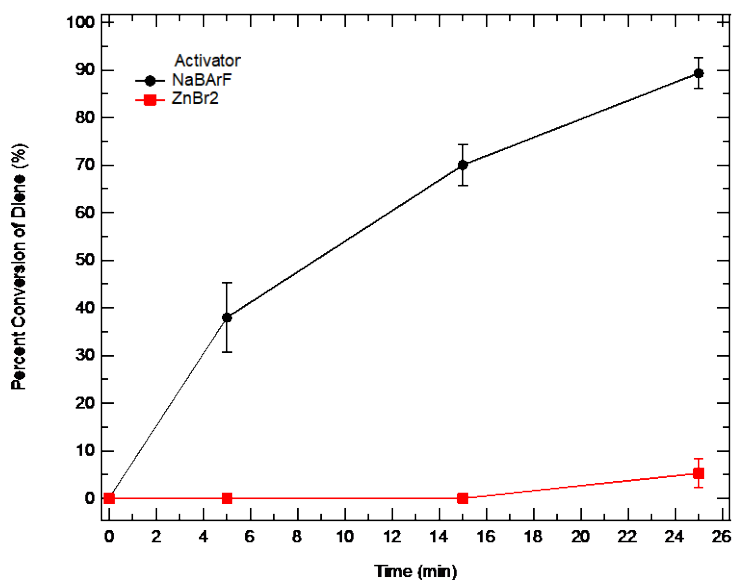**Figure S4.** Graph showing effect of counter ion on heterodimerization

Adapted from Gray, M. et al. Mechanism of Cobalt-Catalyzed Heterodimerization of Acrylates and 1,3-Dienes. A Potential Role of Cationic Cobalt(I) Intermediates. ACS Catal. 10, 4337-4348 (2020).

## General procedures for catalytic reactions

**Procedure A1. Typical procedure for checking the viability of reducing agents via hydrovinylation of linear diene [(E)-1,3-nonadiene].<sup>7,8</sup>** (For Table 2 in the paper and Table S2)

In N<sub>2</sub> filled glovebox, a 25-mL Schenk flask was charged with a magnetic stir bar, [Co(dppp)Cl<sub>2</sub>] (5.5 mg, 0.01 mmol, 0.05 equiv.), reductant (X equiv., as mentioned the in table S1) and NaBARF (18 mg, 0.02 mmol, 0.1equiv.). The flask was capped with rubber septum and taken outside of the box. It was then connected to a Schlenk line with argon and subjected to vacuum then refill (3 cycles). Freshly distilled methylene chloride (0.2M) was added via septum and the mixture stirred for 10 minutes. The flow control stopcock was closed, and an ethylene balloon inserted using a needle via the septum. A 50-mL syringe was used to evacuate the flask (3 x 25 mL) to remove residual argon. At the room temperature, (E)-1,3-nonadiene (25 mg, 0.2 mmol, 1 equiv.) was added neat via a microliter syringe. Progress of the reaction was monitored via GC-FID by taking an aliquot using a syringe and long needle, diluted with pentanes or hexanes and filtered through a shot pad of silica in a glass pipette. Upon completion of reaction, it was further concentrated on a rotary evaporator to afford crude product. The crude hydrovinylation product was subjected to column chromatography using pentane to obtain the product as a clear oil.

GC (methyl silicone, 80 °C, 3 min, 20 °C/min → 250 °C): Rt major [4,1-adduct, branch], 3.1 min (80%); minor [1,4-adduct, linear], 3.8 min (20%)

**Table S2: Optimization of unconventional reducing agents via Co(I)-catalyzed hydrovinylation of diene<sup>a</sup>**

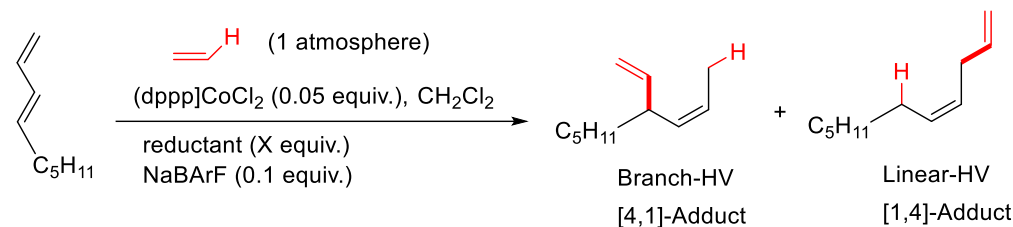

| Entry | Reductant (equiv)        | Time (min) | Conversion (%) <sup>b</sup> | [4,1]:[1,4] |
|-------|--------------------------|------------|-----------------------------|-------------|
| 1     | Zn (0.5)                 | 30         | 100                         | 78:22       |
| 2     | <b>11a</b> (0.05)        | 75         | 100                         | 79:20       |
| 3     | <b>11b</b> (0.05)        | 45         | 100                         | 80:20       |
| 4     | <b>11c</b> (0.5)         | 24x60      | 4                           | -           |
| 5     | Li <sub>3</sub> N (0.10) | 90         | 100                         | 80:20       |

<sup>a</sup> **Procedure A1** was followed with some modification in reducing agent as mentioned.

<sup>b</sup> Conversion is based on GC analysis.

**Procedure A2. Typical procedure for using lithium nitride as a reductant for Co(II) in heterodimerization of 1,3-diene and methyl acrylate.**

In the N<sub>2</sub>-filled glovebox, an 8-mL oven dried vial with a septum cap was charged with magnetic stir bar, isolated metal complex (0.05 equiv.), reducing agent (0.10 - 0.25 equiv.), activator (0.10 – 0.30 equiv.) and DCM (0.35 M). The vial was capped and while stirring the mixture, neat (E)-1,3-undecadiene (1.00 equiv.) followed by distilled methyl acrylate (1.10 equiv.) was added via micro-liter syringe. The resulting green solution was allowed to stir at room temperature and monitored via GC-FID by taking an aliquot with a glass pipette, removing from dry box atmosphere, adding 1:1 diethyl ether/hexanes, filtering through a short pad of silica in a glass pipette, and eluting with diethyl ether. Upon completion of the reaction, the mixture is diluted with 1:1 diethyl ether/hexane, filtered over a short pad of silica using a fritted glass funnel (I.D = 1 inch, height of silica pad ~1.5 inch), and concentrated.

## For Table S2, entry 2

In the N<sub>2</sub>-filled glovebox, an 8-mL oven dried vial with a septum cap was charged with magnetic stir bar, dpppCoCl<sub>2</sub> (0.05 eq.), Li<sub>3</sub>N (1.14 mg, 0.03 mmol), InBr<sub>3</sub> (13 mg, 0.03 mmol) DCM (0.94 mL), (E)-1,3-undecadiene (50 mg, 0.3 mmol), and distilled methyl acrylate (31 mg, 0.36 mmol). Upon completion of the reaction (2 h), the mixture is exposed to air and diluted with 1:1 diethyl ether/hexane, filtered over a short pad of silica using a fritted glass funnel, and concentrated to afford the title compound (61 mg, 79% yield) as a colorless oil.

**Table S3: Optimization of reaction conditions for heterodimerization of diene and methyl acrylate: Li<sub>3</sub>N as a reducing agent**<sup>a</sup>

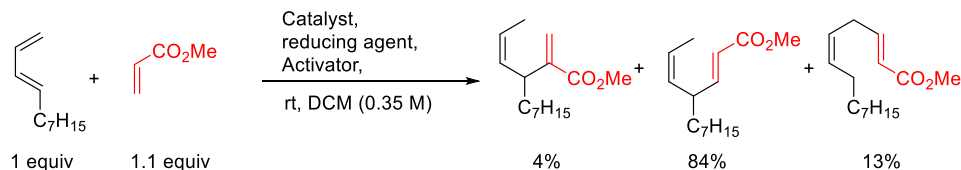

| Entry          | Catalyst                           | Reductant<br>(0.10 equiv.)   | Activator<br>(0.10 equiv.)   | Conv. <sup>b</sup><br>(%),<br>time (h) | Isolated Yield<br>(%) |
|----------------|------------------------------------|------------------------------|------------------------------|----------------------------------------|-----------------------|
| 1              | dpppCoBr <sub>2</sub>              | Li <sub>3</sub> N (0.25 eq.) | InBr <sub>3</sub>            | 100, 7                                 | 65                    |
| 2              | <b>dpppCoBr<sub>2</sub></b>        | <b>Li<sub>3</sub>N</b>       | <b>InBr<sub>3</sub></b>      | <b>100, 2</b>                          | <b>79</b>             |
| 3              | dpppCoBr <sub>2</sub>              | Li <sub>3</sub> N            | NaBARF                       | 100, 2                                 | 52                    |
| 4              | dpppCoBr <sub>2</sub>              | Li <sub>3</sub> N (0.25 eq.) | InCl <sub>3</sub> (0.30 eq.) | 100, 2                                 | 83                    |
| 5              | <b>dpppCoCl<sub>2</sub></b>        | <b>Li<sub>3</sub>N</b>       | <b>InBr<sub>3</sub></b>      | <b>98, 0.25</b>                        | <b>91</b>             |
| 6              | dpppCoCl <sub>2</sub>              | Li <sub>3</sub> N            | NaBARF                       | 100, 24                                | 70                    |
| 7 <sup>c</sup> | dpppCoCl <sub>2</sub>              | Li <sub>3</sub> N            | InCl <sub>3</sub>            | 14, 12                                 | -                     |
| 8 <sup>d</sup> | <b>(S,S)-BDPP)CoBr<sub>2</sub></b> | <b>Li<sub>3</sub>N</b>       | <b>InBr<sub>3</sub></b>      | <b>100, 3</b>                          | <b>84 (99% ee)</b>    |

<sup>a</sup> **Procedure A2** followed with some modification in activators and reducing agent as mentioned.

<sup>b</sup> Conversion is based on GC analysis. <sup>c</sup> 0.5M DCM is used. <sup>d</sup> (S,S)-BDPPCoBr<sub>2</sub> was synthesized in-situ as mentioned in the **procedure A3**.

### **Procedure A3. Typical procedure for in situ generation of metal complex for heterodimerization.** (Table S3, Entry 8)

In N<sub>2</sub>-filled glovebox, an 8 mL oven dried vial equipped with a septum cap was charged with a magnetic stir bar, (S,S)-BDPP (0.05 eq.), CoBr<sub>2</sub> (0.05 eq.) and DCM (0.35 M) and



allowed to stir for 15 min. Reducing agent (0.10 eq.) was then added and the solution was allowed to stir for another 15 minutes.  $\text{InBr}_3$  (0.10 eq.), 1,3-(*E*)-undecadiene (50 mg, 0.3 mmol, 1.00 eq.), and distilled methyl acrylate (31 mg, 0.36 mmol, 1.10 eq.) were then added via micro-liter syringe. The mixture was stirred at room temperature and monitored by taking an aliquot using a glass pipette, diluting with mixture of diethyl ether/hexane (1:1) and filtered through a short pad of silica in a glass pipette eluting with diethyl ether and analyzed via GC. Upon completion of the reaction (0.25 h), the mixture is exposed to air and diluted with 1:1 diethyl ether/hexane, filtered over a short pad of silica using a fritted glass funnel (I.D = 1 inch, height of silica pad ~1.5 inch), and concentrated to afford the title compound as a colorless oil.

The product derived from in-situ generated catalyst [(*S,S*)-BDPP/ $\text{CoBr}_2/\text{Li}_3\text{N}/\text{InBr}_3$ ] showed 99% ee. (See attached CSP-GC chromatogram below)

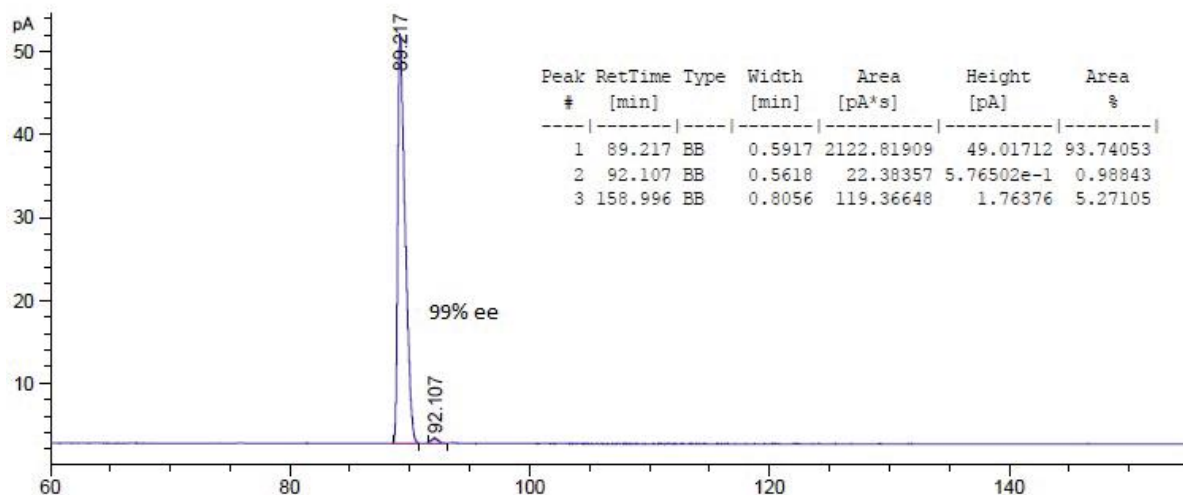

**Procedure A4. Typical procedure for heterodimerization of linear diene with methyl acrylate.** (For Table 3, entry 3 in paper).

In  $\text{N}_2$  filled glovebox, an 8-mL vial equipped with a septum screw cap was charged with a magnetic stir bar, (QuinoxP\*) $\text{CoBr}_2$  (5 mol%), Zn (100 mol%), NaBARF (10 mol%) and DCM (0.8 mL). The vial was capped and while stirring the mixture, (*E*)-1,3-nonadiene (25 mg, 0.2 mmol, 1 equiv.) was added neat using microliter syringe via the septum, followed by methyl

acrylate (19 mg, 0.22 mmol, 1.1 equiv.). The mixture was stirred at rt and monitored by taking an aliquot using a glass pipette, diluting with a mixture of *n*-pentane/Et<sub>2</sub>O (1: 1) and filtered through a pad of silica in a glass pipette eluting with diethyl ether and analyzed via GC-FID. Upon completion of the reaction, the vial was taken out of the box and the reaction mixture worked-up and crude product was isolated via column chromatography.

For Table 3, entry 4 in paper, **Procedure C1** followed with some modification in reductant; **11a** (5 mol%) was used instead of Zn (100 mol%).

### B1. Typical procedure for hydrovinylation of linear diene using isolated Co(I) complex **12**.<sup>7,8</sup>

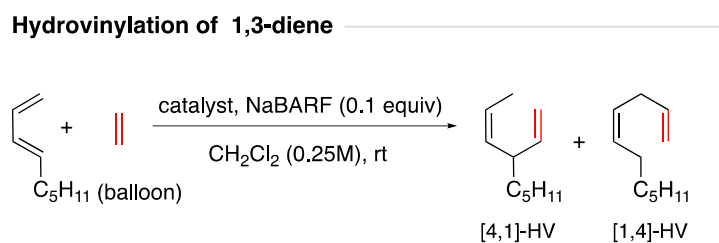

| entry | catalyst                                                                                      | time (min) | conver. (%) | % yield (% <i>rr</i> <sup>†</sup> ) |
|-------|-----------------------------------------------------------------------------------------------|------------|-------------|-------------------------------------|
| 1.    | (dppp)CoCl <sub>2</sub> (0.05 equiv)<br>Zn (1 equiv.) (in situ)                               | 30         | 100         | 95 (78:22)                          |
| 2.    | (dppp) <sub>3</sub> Co <sub>2</sub> Cl <sub>2</sub> <sup>*</sup><br>( <b>12</b> , 0.02 equiv) | 15         | 100         | 97 (77:23)                          |

<sup>\*</sup>isolated Co(I) complex. <sup>†</sup>*rr* regioisomeric ratio.

### Figure S4: Hydrovinylation of linear diene using isolated Co(I) complex **12**

In N<sub>2</sub> filled glovebox, a 25-mL Schlenk flask was charged with a magnetic stir bar, [Co<sub>2</sub>(dppp)<sub>3</sub>Cl<sub>2</sub>] (**12**) (0.004 mmol, 0.02 equiv.), and NaBARF (0.008 mmol, 0.04equiv.). The flask was capped with rubber septum and taken outside of the box. It was then connected to a Schlenk line with argon and subjected to vacuum then refill (3 cycles). Freshly distilled methylene chloride (DCM) (0.25 M) was added via septum and the mixture stirred for a few minutes. The flow control stopcock was closed, and an ethylene balloon inserted using a

needle via the septum. A 50-mL syringe was used to evacuate the flask (3 x 25 mL) to remove residual argon. At the room temperature, (*E*)-1,3-nonadiene (25 mg, 0.2 mmol) was added neat via a microliter syringe. Progress of the reaction was monitored via GC-FID by taking an aliquot using a syringe and long needle, diluted with pentanes or hexanes, and filtered through a shot pad of silica in a glass pipette. Upon completion of reaction, it was further concentrated on a rotary evaporator to afford crude product. The crude hydrovinylation product was subjected to column chromatography using pentane to obtain the product as a clear oil.

GC (methyl silicone, 80 °C, 3 min, 20 °C/min → 250 °C): Rt major [4,1-adduct/branch], 3.1 min (80%); minor [1,4-adduct, linear], 3.8 min (20%)

For entry 1, i.e., in situ generation of the Co(I) complex, [Co<sub>2</sub>(dppp)<sub>3</sub>Cl<sub>2</sub>] (**12**) was replaced by Co(dppp)Cl<sub>2</sub> (0.01 mmol, 0.05 equiv.), Zn (0.2 mmol, 1 equiv.).

**Procedure B2. Use of isolated Co(I) complex (18) for heterodimerization of linear diene with methyl acrylate.** (For Table 3, entry 2 in paper)

In N<sub>2</sub> filled glovebox, an 8-mL vial equipped with a septum screw cap was charged with a magnetic stir bar, Isolated {[*R,R*]-QuinoxP\*]cobalt(μ-Br)}<sub>2</sub> (**18**) (3.8 mg, 0.02 equiv.) , NaBARF (0.05 equiv., 8.9 mg) and DCM (0.8 mL). The vial was capped and while stirring the mixture, (*E*)-1,3-nonadiene (25 mg, 0.2 mmol, 1 equiv.) was added neat using microliter syringe via the septum, followed by methyl acrylate (19 mg, 0.22 mmol, 1.1 equiv.). The mixture was stirred at rt and monitored by taking an aliquot using a glass pipette, diluting with a mixture of *n*-pentane/Et<sub>2</sub>O (1: 1) and filtered through a pad of silica in a glass pipette eluting with diethyl ether and analyzed via GC-FID. Upon completion of the reaction, the vial was taken out of the box and the reaction mixture worked-up and crude product was isolated via column chromatography.

**Procedure B3. Use of isolated  $\{[(R,R)\text{-QuinoxP}]\text{Co(I)}(\eta^6\text{-C}_6\text{D}_6)\}^+[\text{BARF}]^-$  (**23**) for heterodimerization of linear diene with methyl acrylate.** (For Table 3, entry 1 in paper)

In N<sub>2</sub> filled glovebox, an 8-mL vial equipped with a septum screw cap was charged with a magnetic stir bar, Isolated  $\{[(R,R)\text{-QuinoxP}^*]\text{cobalt}(\eta^6\text{-C}_6\text{D}_6)\}^+[\text{BARF}]^-$  (**23**) (0.01 equiv.), and DCM (0.8 mL). The vial was capped and while stirring the mixture, (*E*)-1,3-nonadiene (25 mg, 0.2 mmol, 1 equiv.) was added neat using microliter syringe via the septum, followed by methyl acrylate (19 mg, 0.22 mmol, 1.1 equiv.). The mixture was stirred at rt and monitored by taking an aliquot using a glass pipette, diluting with a mixture of *n*-pentane/Et<sub>2</sub>O (1: 1) and filtered through a pad of silica in a glass pipette eluting with diethyl ether and analyzed via GC-FID. Upon completion of the reaction, the vial was taken out of the box and the reaction mixture worked-up and crude product was isolated via column chromatography.

NMR data of compound 25 matched with the previously reported compound.<sup>8</sup>

**GC** (methyl silicone, 80 °C, 3 min, 20 °C/min → 250 °C): Rt major [4,1-adduct/branch], 7.24 min (>95%)

**CSP-GC** (cyclosil B, 125 °C, 60 min, 5°C → 175 °C): Rt from dpppCoBr<sub>2</sub>/Zn/NaBARF; [1,4 - adduct] 28.8 min (49.7%), 29.8 min (50.3%).

The product derived from (QuinoxP\*)CoBr<sub>2</sub> / Zn/NaBARF; 28.8 min (96.8%), 29.8 min (3.2%); **93% ee.**

The product derived from (QuinoxP\*)CoBr<sub>2</sub>/**11a**/NaBARF; 28.7 min (96.6%), 29.7 min (3.4%); **93% ee.**

The product derived from Isolated  $\{[(R,R)\text{-QuinoxP}^*]\text{cobalt}(\mu\text{-Br})_2\}$  (**18**) / NaBARF; 28.7 min (96.2%), 29.7 min (3.8%); **92% ee.**

The product derived from Isolated  $\{[(R,R)\text{-QuinoxP}^*]\text{cobalt}(\eta^6\text{-C}_6\text{D}_6)\}^+[\text{BARF}]^-$  (**23**) in DCM; 28.7 min (97%), 29.7 min (3%); **94% ee.**

The product derived from Isolated  $\{[(R,R)\text{-QuinoxP}^*]\text{cobalt}(\eta^6\text{-C}_6\text{D}_6)\}^+ [\text{BARF}]^-$  (**23**) in Benzene- $\text{D}_6$ ; 28.7 min (98%), 29.7 min (2%); **96% ee**.

**Procedure C. Use of isolated  $\{[(R,R)\text{-iPr-DuPhos}]\text{Co(I)-}\eta^4\text{-}(2,3\text{-dimethylbutadiene})\}^+ [\text{BARF}]^-$  (**25**) for hydroacylation of isoprene/2-siloxy 1,3-diene** (for Table 4, entry 1).

In  $\text{N}_2$  filled glovebox, an 8-mL vial equipped with a septum screw cap was charged with a magnetic stir bar, Isolated  $\{[(R,R)\text{-iPr-DuPhos}]\text{cobalt-}\eta^4\text{-}(2,3\text{-dimethylbutadiene})\}^+ [\text{BARF}]^-$  (**30**) (0.01 equiv.) and diethyl diethyl ether (0.8 mL). The vial was capped and while stirring the mixture, Benzaldehyde (0.2 mmol, 1.0 equiv.) was added neat using microliter syringe via the septum, followed by isoprene (0.6 mmol, 3 equiv.). The mixture was stirred at rt and monitored by taking an aliquot using a glass pipette, diluting with diethyl ether, and filtering through a pad of silica in a glass pipette eluting with diethyl ether. The mixture was analyzed via GC-FID. Upon completion of the reaction the vial was taken out of the box, exposed to air, and quenched with diethyl ether (5 mL) and the resulting mixture was filtered over a short pad of silica (using a fritted glass funnel, I.D = 1 inch, height of silica pad ~1.5 inch) eluting diethyl ether. It was further concentrated on a rotary evaporator to afford crude product. The crude hydroacylation product was subjected to column chromatography using 5% ethyl acetate-hexanes to obtain the desired products as a clear oil. NMR and CSP-GC data matched with previously reported compounds by our group.<sup>6</sup>

**Table S4 . Activator-free, single-component (entries 1 and 5) and in situ generated [Co<sup>I</sup>]<sup>+</sup>-catalysts for hydroacylation of isoprene and 2-trimethylsilyloxy-1,3-butadiene<sup>a</sup>**

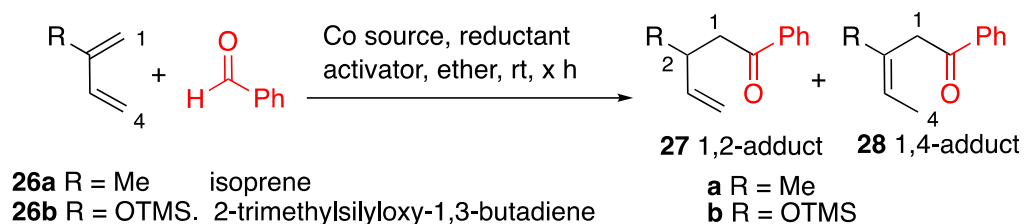

| no.            | Co <sup>I</sup> -source (equiv.)                                                                                        | reductant (equiv.) | activator (equiv.) | 1,2:1,4 adduct                      | time (h) | Conversion, (% ee) <sup>c</sup> |
|----------------|-------------------------------------------------------------------------------------------------------------------------|--------------------|--------------------|-------------------------------------|----------|---------------------------------|
|                |                                                                                                                         |                    |                    | (isoprene)                          |          |                                 |
| 1.<br>b        | {[( <i>R,R</i> )- <i>i</i> -Pr-DUPHOS] Co <sup>I</sup> [2,3-DMBD]} <sup>+</sup> [BARF] <sup>-</sup> ( <b>25</b> , 0.01) | 0                  | 0                  | 60:40                               | 40       | 60 (96, <i>R</i> )              |
| 2.             | {[( <i>R,R</i> )- <i>i</i> -Pr-DUPHOS] Co <sup>I</sup> Cl] <sub>2</sub> ( <b>20</b> , 0.025)                            | 0                  | NaBARF (0.075)     | 60:40                               | 24       | 100 (96, <i>R</i> )             |
| 3.             | {[( <i>R,R</i> )- <i>i</i> -Pr-DUPHOS] Co <sup>I</sup> Cl] <sub>2</sub> ( <b>20</b> , 0.025)                            | 0                  | 0                  | N/A                                 | 24       | 0 (N/A)                         |
| 4.             | [( <i>R,R</i> )- <i>i</i> -Pr-DUPHOS] Co <sup>II</sup> Br <sub>2</sub> (0.05)                                           | Zn (0.5)           | NaBARF (0.075)     | 60:40                               | 24       | 93 (96, <i>R</i> )              |
| 5.             | [( <i>R,R</i> )- <i>i</i> -Pr-DUPHOS] Co <sup>II</sup> Br <sub>2</sub> (0.05)                                           | Zn (0.5)           | 0                  | N/A                                 | 24       | 0 (N/A)                         |
|                |                                                                                                                         |                    |                    | (2-trimethylsilyloxy-1,3-butadiene) |          |                                 |
| 6 <sup>b</sup> | {[( <i>R,R</i> )- <i>i</i> -Pr-DUPHOS] Co <sup>I</sup> [2,3-DMBD]} <sup>+</sup> [BARF] <sup>-</sup> ( <b>25</b> , 0.05) | 0                  | 0                  | 35:65                               | 30       | 90 (98, <i>R</i> )              |
| 7.             | [( <i>R,R</i> )- <i>i</i> -Pr-DUPHOS] Co <sup>II</sup> Br <sub>2</sub> <b>20</b> (0.05)                                 | Zn (0.5)           | NaBARF (0.075)     | 35:65                               | 30       | 87 (98, <i>R</i> )              |
| 8.             | [( <i>R,R</i> )- <i>i</i> -Pr-DUPHOS] Co <sup>II</sup> Br <sub>2</sub> <b>20</b> (0.05)                                 | Zn (0.5)           | 0                  | N/A                                 | 30       | 0 (N/A)                         |

<sup>a</sup> Single-component catalyst (shaded entries). DMBD: 2,3-dimethyl-1,3-butadiene

<sup>b</sup> Conversion is based on the consumption of benzaldehyde. <sup>c</sup> Regioselectivities and enantioselectivities were determined by GC and CSP-GC respectively.

**Procedure D1. Use of isolated  $\{[(R,R)\text{-}i\text{Pr-DuPhos}]\text{Co(I)}\text{-}\eta^4\text{-}(2,3\text{-dimethylbutadiene})\}^+ [\text{BARF}]^-$  (25) for hydroboration of 2,3-dimethylbuta-1,3-diene** (for Table 5, entry 1 in the paper).

In  $\text{N}_2$  filled glovebox, an 8-mL vial equipped with a septum screw cap was charged with a magnetic stir bar, Isolated  $\{[(R,R)\text{-}i\text{Pr-DuPhos}]\text{cobalt-}\eta^4\text{-}(2,3\text{-dimethylbutadiene})\}^+ [\text{BARF}]^-$  (25) (0.02 equiv.) and DCM (0.8 mL). The vial was capped and while stirring the mixture, HBPIn (0.22 mmol, 1.05 equiv.) was added neat using microliter syringe via the septum, followed by 2,3-dimethylbuta-1,3-diene (0.2 mmol, 1 equiv.). The mixture was stirred at rt and monitored by taking an aliquot using a glass pipette, diluting with diethyl ether, and filtering through a pad of silica in a glass pipette eluting with diethyl ether. The mixture was analyzed via GC-FID. Upon completion of the reaction the vial was taken out of the box, exposed to air and quenched with diethyl ether (5 mL) and the resulting mixture was filtered over a short pad of silica (using a fritted glass funnel, I.D = 1 inch, height of silica pad ~1.5 inch) eluting diethyl ether. It was further concentrated on a rotary evaporator to afford crude product. The crude hydroboration product was subjected to column chromatography using 5% diethyl ether-pentane to obtain the hydroboration products as a clear oil.

**Procedure D2. Use of in-situ generated Co(I) complex for hydroboration of 2,3-dimethylbuta-1,3-diene** ( for Table 5, entry 2 in the paper)

In  $\text{N}_2$  filled glovebox, an 8-mL vial equipped with a septum screw cap was charged with a magnetic stir bar,  $[(R,R)\text{-}i\text{Pr-DuPhosCoBr}_2]$  (0.05 equiv.), Zn (0.5 equiv.), and NaBARF (0.1 equiv.) and DCM (0.8 mL). The vial was capped and while stirring the mixture, HBPIn (0.22 mmol, 1.05 equiv.) was added neat using microliter syringe via the septum, followed by 2,3-dimethylbuta-1,3-diene (0.2 mmol, 1 equiv.). The mixture was stirred at rt and monitored by taking an aliquot using a glass pipette, diluting with diethyl ether, and filtering through a pad of

silica in a glass pipette eluting with diethyl ether. The mixture was analyzed via GC-FID. Upon completion of the reaction the vial was taken out of the box, exposed to air and quenched with diethyl ether (5 mL) and the resulting mixture was filtered over a short pad of silica (using a fritted glass funnel, I.D = 1 inch, height of silica pad ~1.5 inch) eluting diethyl ether. It was further concentrated on a rotary evaporator to afford crude product. The crude hydroboration product was subjected to column chromatography using 5% diethyl ether-pentane to obtain the hydroboration product as a clear oil.

**GC** (methyl silicone, 50 °C, 5 min, 20 °C/min → 250 °C): Rt from dppp, major [1,2-adduct **29**], 8.9 min (66%); minor [1,4-adduct **30**], 9.1 min (34%); from  $\{[(R,R)\text{-}^i\text{Pr-DuPhos}]_{\text{cobalt-}\eta^4\text{-}(2,3\text{-dimethylbutadiene})\}^+ [\text{BARF}]^-$  (**25**); major [1,2-adduct **29**], 8.9 min (53%); [1,4-adduct **30**], 9.1 min (33%); [Vinyl boronate **31**], 9.2 min (14%).

NMR of **29-31** matched with the previously reported data by our group.<sup>3</sup>

**<sup>1</sup>H NMR (600 MHz, C6D6)** δ 4.9 (m, 1H), 4.75 (pent, J = 1.8 Hz, 1H), 2.68 – 2.61 (m, 1H), 1.70 (s, 3H), 1.16 (d, J = 6.8 Hz, 3H), 1.06 (s, 12H), 1.03 – 1.02 (m, 2H); **<sup>13</sup>C NMR (150 MHz, C6D6)** δ 152.16, 108.40, 82.81, 37.43, 25.02, 24.94, 22.28, 20.04. Expected 9 C; observed 8 C (missing C-B).

**CSP-GC** (cyclosil B, 90 °C, 60 min , 5 °C → 175 °C): Rt from dppp; [1,2 - adduct] 24.0 min (49.7%), 24.4 min (50.3%).

Using catalyst  $\{[(R,R)\text{-}^i\text{Pr-DuPhos}]_{\text{cobalt-}\eta^4\text{-}(2,3\text{-dimethylbutadiene})\}^+ [\text{BARF}]^-$  (**25**): major [1,2 -adduct] 24.0 min (10.7%), 24.4 min (89.3%); **79% ee**

Using catalyst  $[(R,R)\text{-}^i\text{Pr-DuPhosCoBr}_2]$  (0.05 equiv.), Zn (0.5 equiv.), and NaBARF (0.1 equiv.): major [1,2 -adduct] 24.1 min (14.7%), 24.4 min (85.3%); **70% ee**

**HRMS (ESI-MS):** m/z 233.1697 ([M+Na<sup>+</sup>]); exact mass calculated for [C<sub>12</sub>H<sub>23</sub>BO<sub>2</sub>Na<sup>+</sup>] 233.1686.



**Table S5: Catalytic activity of single-component catalyst  $\{[(R,R)\text{-}i\text{-Pr-DuPhos}]\text{cobalt-}\eta^4\text{-}(2,3\text{-dimethylbutadiene})\}^+ [\text{BARF}]^-$  (**25**) in an asymmetric hydroboration reaction<sup>a</sup>**

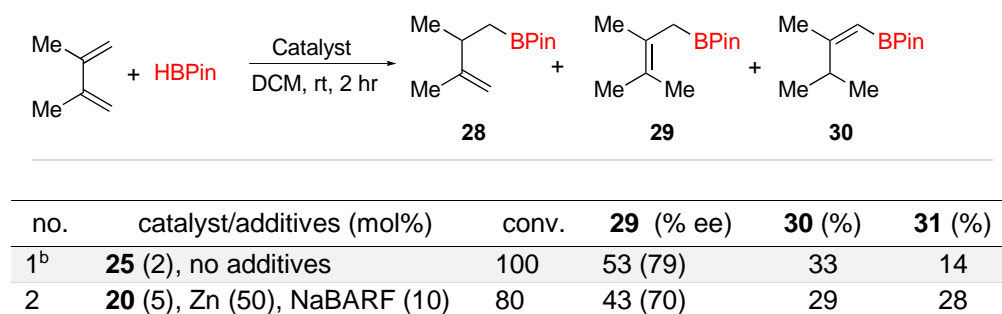

a. See procedure D1-D2 for experimental details. Conversion and relative ratios of **29**, **30** and **31** determined by GC. b. Single-component catalyst.

## References

- Smith, C. R.; Zhang, A.; Mans, D. J. and RajanBabu, T. V. (*R*)-3-Methyl-3-Phenyl-1-Pentene Via Catalytic Asymmetric Hydrovinylation. *Org. Synth.* 2008, **85**, 248-266.
- Sulzbach, R. A.; Iqbal, A. F. M., 1,4-Bis(trimethylsilyl)-1,4-dihydropyrazine by Reductive Silylation of Pyrazine. *Angew. Chem. Int. Ed. Engl.* 1971, **10**, 127.
- Duvvuri, K.; Dewese, K. R.; Parsutkar, M. M.; Jing, S. M.; Mehta, M. M.; Gallucci, J. C.; RajanBabu, T. V. Cationic Co(I)-Intermediates for Hydrofunctionalization Reactions: Regio- and Enantioselective Cobalt-Catalyzed 1,2-Hydroboration of 1,3-Dienes. *J. Am. Chem. Soc.* 2019, **141**, 7365-7375.
- Friedfeld, M. R.; Zhong, H.; Ruck, R. T.; Shevlin, M.; Chirik, P. J. Cobalt-catalyzed asymmetric hydrogenation of enamides enabled by single-electron reduction. *Science* 2018, **360**, 888-893.
- Kooistra, T. M.; Knijnenburg, Q.; Smits, J. M. M.; Horton, A. D.; Budzelaar, P. H. M.; Gal, A. W. Olefin polymerization with  $\{bis(imino)pyridyl\}(CoCl_2)\text{-Cl}$ : Generation of the active species involves Co(I). *Angew. Chem. Int. Ed.* 2001, **40**, 4719-4722.
- Parsutkar, M. M.; RajanBabu, T. V.  $\alpha$ - and  $\beta$ -Functionalized Ketones from 1,3-Dienes and Aldehydes: Control of Regio- and Enantioselectivity in Hydroacylation of 1,3-Dienes. *J. Am. Chem. Soc.* 2021, **143**, 12825–12835.
- Timsina, Y. N.; Sharma, R. K.; RajanBabu, T. V. Cobalt-catalysed asymmetric hydrovinylation of 1,3-dienes, *Chem. Sci.* 2015, **6**, 3994.
- Jing, S. M.; Balasanthiran, V.; Pagar, V.; Gallucci, J. C.; RajanBabu, T. V. Catalytic Enantioselective Hetero-dimerization of Acrylates and 1,3-Dienes. *J. Am. Chem. Soc.* 2017, **139**, 18034-18043.

X-Ray Crystallographic Analysis of  
[(dppp)(Cl)Co[ $\mu$ -(dppp)]Co(Cl)(dppp)] (**12**)

**Table S6.** Crystallographic details for RajanBabu 2160 (12)

|                                   |                                                                                |                  |
|-----------------------------------|--------------------------------------------------------------------------------|------------------|
| Formula                           | C <sub>81</sub> H <sub>78</sub> Cl <sub>2</sub> Co <sub>2</sub> P <sub>6</sub> |                  |
| Formula weight                    | 1426.01                                                                        |                  |
| Temperature                       | 210(2) K                                                                       |                  |
| Wavelength                        | 0.71073 Å                                                                      |                  |
| Crystal system                    | Triclinic                                                                      |                  |
| Space group                       | P -1                                                                           |                  |
| Unit cell dimensions              | a = 21.4598(9) Å                                                               | α = 66.4390(10)° |
|                                   | b = 21.5413(9) Å                                                               | β = 66.4010(10)° |
|                                   | c = 23.7245(10) Å                                                              | γ = 71.7220(10)° |
| Volume                            | 9056.8(7) Å <sup>3</sup>                                                       |                  |
| Z                                 | 4                                                                              |                  |
| Density (calculated)              | 1.046 Mg/m <sup>3</sup>                                                        |                  |
| Absorption coefficient            | 0.566 mm <sup>-1</sup>                                                         |                  |
| F(000)                            | 2968                                                                           |                  |
| Crystal size                      | 0.04 x 0.15 x 0.35 mm <sup>3</sup>                                             |                  |
| Theta range for data collection   | 2.755 to 25.057°                                                               |                  |
| Index ranges                      | -25 ≤ h ≤ 25, -25 ≤ k ≤ 25, -28 ≤ l ≤ 28                                       |                  |
| Reflections collected             | 242477                                                                         |                  |
| Independent reflections           | 32006 [R(int) = 0.0625]                                                        |                  |
| Completeness to theta = 25.057°   | 99.7 %                                                                         |                  |
| Refinement method                 | Full-matrix least-squares on F <sup>2</sup>                                    |                  |
| Data / restraints / parameters    | 32006 / 0 / 1640                                                               |                  |
| Goodness-of-fit on F <sup>2</sup> | 1.025                                                                          |                  |
| Final R indices [I > 2σ(I)]       | R1 = 0.0422, wR2 = 0.1056                                                      |                  |
| R indices (all data)              | R1 = 0.0644, wR2 = 0.1171                                                      |                  |
| Largest diff. peak and hole       | 0.343 and -0.523 e/Å <sup>3</sup>                                              |                  |

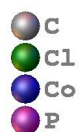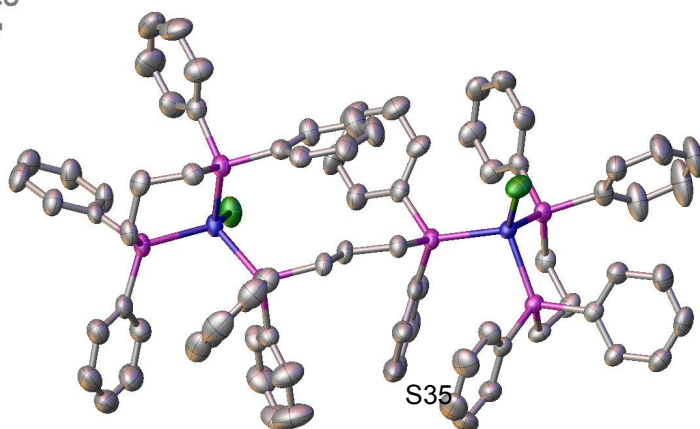

X-Ray Crystallographic Analysis of  
[(dppe)(Cl)Co[ $\mu$ -(dppe)]Co(Cl)(dppe)] (**13**)

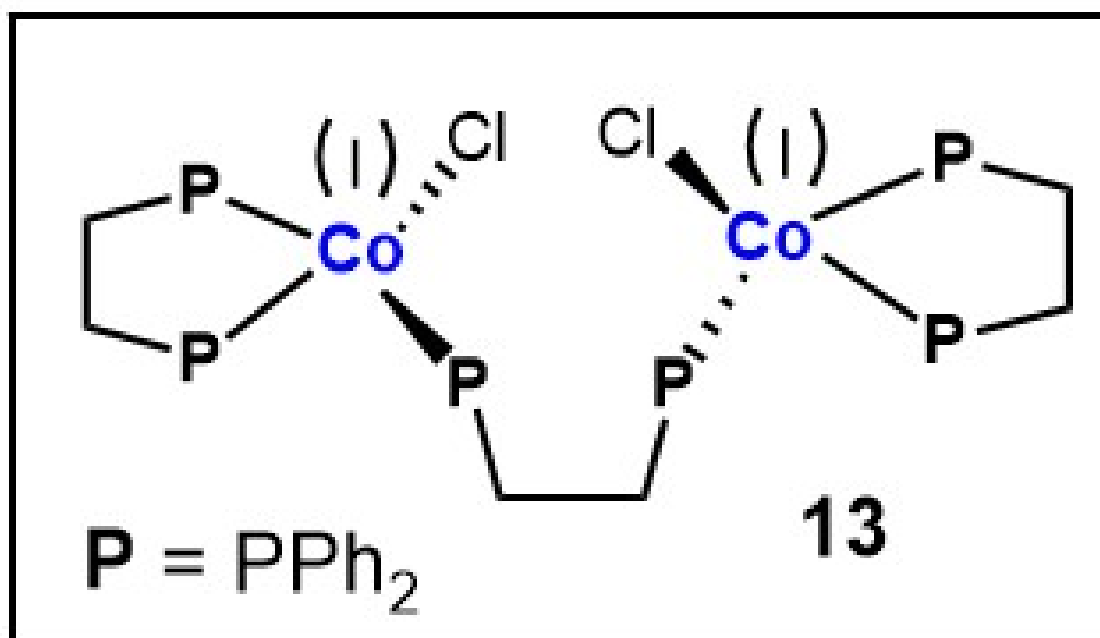

### **Experimental Summary for 13**

The single crystal X-ray diffraction studies were carried out on a Nonius Kappa diffractometer equipped with a Bruker APEX-II CCD and Mo K $_{\alpha}$  radiation ( $\lambda = 0.71073 \text{ \AA}$ ). A 0.113 x 0.089 x 0.074 mm piece of a green block was mounted on a MiTeGen Micromount with CHRISTO-LUBE MCG 1024 oil. Data were collected in a nitrogen gas stream at 100(2) K using  $\phi$  and  $\omega$  scans. Crystal-to-detector distance was 40 mm and exposure time was 60 seconds per frame using a scan width of 1.0°. Data collection was 100% complete to 25.00° in  $\theta$ . A total of 56953 reflections were collected covering the indices,  $-17 \leq h \leq 17$ ,  $-15 \leq k \leq 15$ ,  $-23 \leq l \leq 23$ . 6870 reflections were found to be symmetry independent, with a  $R_{\text{int}}$  of 0.0910. Indexing and unit cell refinement indicated a primitive, monoclinic lattice. The space group was found to be  $P2_1/c$ . The data were integrated using the Bruker SAINT software program and scaled using the SADABS software program. Solution by direct methods (SHELXT) produced a complete phasing model consistent with the proposed structure.

All nonhydrogen atoms were refined anisotropically by full-matrix least-squares (SHELXL-2014). All hydrogen atoms were placed using a riding model. Their positions were constrained relative to their parent atom using the appropriate HFIX command in SHELXL-2014. Crystallographic data are summarized in **Table S7**.

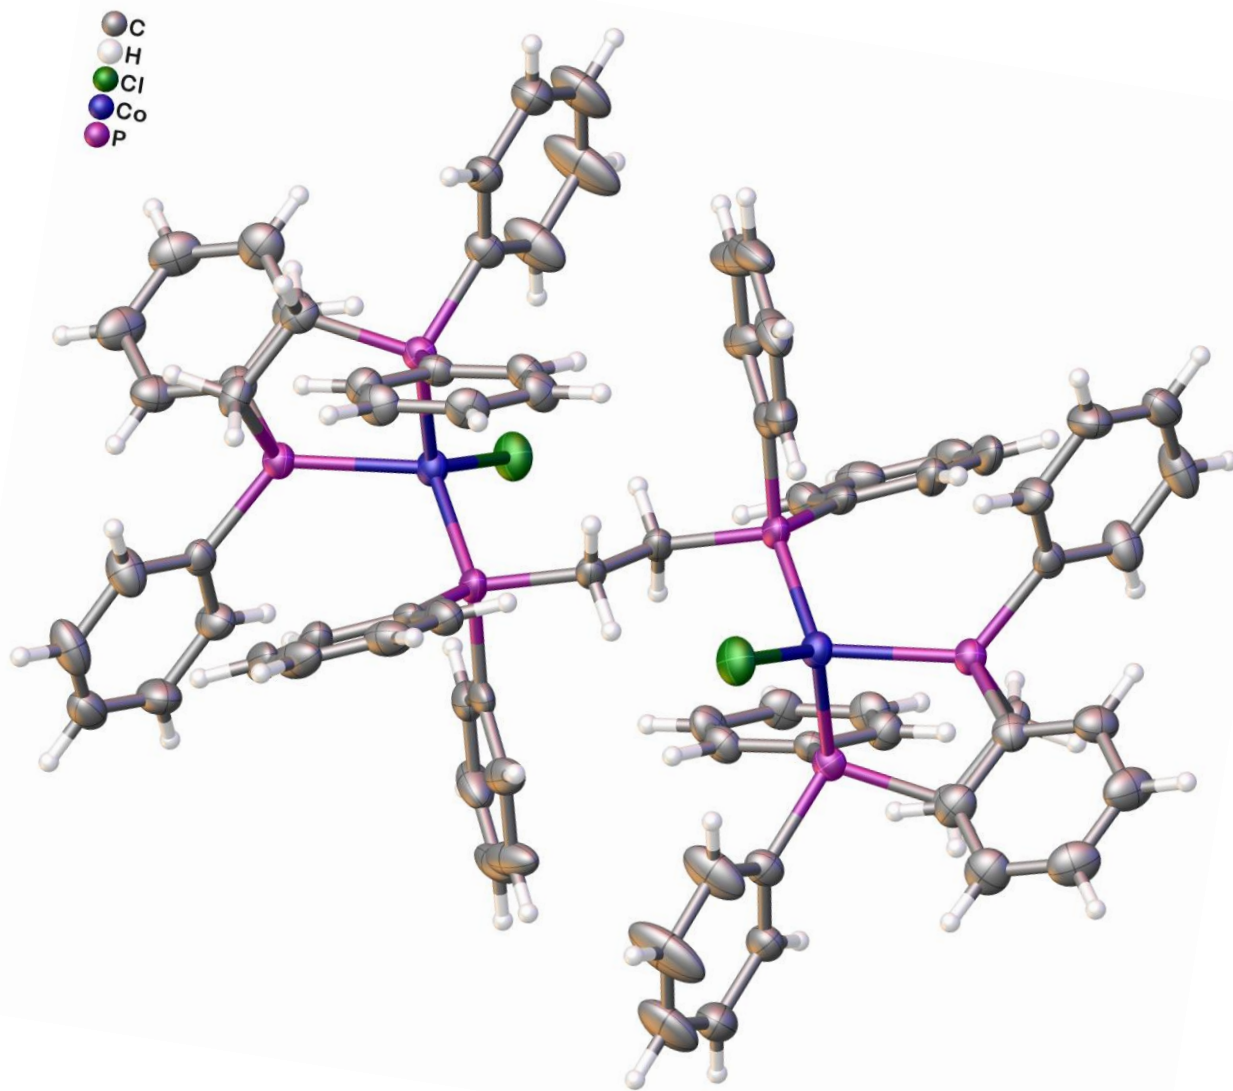

**Table S7.** Crystal data and structure refinement for RBabu\_MP-05-076.

|                                   |                                                                                                                     |
|-----------------------------------|---------------------------------------------------------------------------------------------------------------------|
| Report date                       | 2019-08-08                                                                                                          |
| Identification code               | MP-05-076                                                                                                           |
| Empirical formula                 | C <sub>86</sub> H <sub>88</sub> Cl <sub>2</sub> Co <sub>2</sub> O <sub>2</sub> P <sub>6</sub>                       |
| Molecular formula                 | C <sub>78</sub> H <sub>72</sub> Cl <sub>2</sub> Co <sub>2</sub> P <sub>6</sub> , 2(C <sub>4</sub> H <sub>8</sub> O) |
| Formula weight                    | 1528.14                                                                                                             |
| Temperature                       | 100 K                                                                                                               |
| Wavelength                        | 0.71073 Å                                                                                                           |
| Crystal system                    | Monoclinic                                                                                                          |
| Space group                       | P 1 21/c 1                                                                                                          |
| Unit cell dimensions              | a = 14.7933(14) Å      α = 90°.<br>b = 13.2529(11) Å      β = 102.074(3)°.<br>c = 19.5680(19) Å      γ = 90°.       |
| Volume                            | 3751.5(6) Å <sup>3</sup>                                                                                            |
| Z                                 | 2                                                                                                                   |
| Density (calculated)              | 1.353 Mg/m <sup>3</sup>                                                                                             |
| Absorption coefficient            | 0.690 mm <sup>-1</sup>                                                                                              |
| F(000)                            | 1596                                                                                                                |
| Crystal size                      | 0.113 x 0.089 x 0.074 mm <sup>3</sup>                                                                               |
| Crystal color, habit              | Green Block                                                                                                         |
| Theta range for data collection   | 1.408 to 25.374°.                                                                                                   |
| Index ranges                      | -17<=h<=17, -15<=k<=15, -23<=l<=23                                                                                  |
| Reflections collected             | 56953                                                                                                               |
| Independent reflections           | 6870 [R(int) = 0.0910, R(sigma) = 0.0726]                                                                           |
| Completeness to theta = 25.000°   | 100.0 %                                                                                                             |
| Absorption correction             | Semi-empirical from equivalents                                                                                     |
| Max. and min. transmission        | 0.2590 and 0.2226                                                                                                   |
| Refinement method                 | Full-matrix least-squares on F <sup>2</sup>                                                                         |
| Data / restraints / parameters    | 6870 / 54 / 449                                                                                                     |
| Goodness-of-fit on F <sup>2</sup> | 1.023                                                                                                               |
| Final R indices [I>2sigma(I)]     | R1 = 0.0509, wR2 = 0.1155                                                                                           |
| R indices (all data)              | R1 = 0.0974, wR2 = 0.1334                                                                                           |
| Extinction coefficient            | n/a                                                                                                                 |
| Largest diff. peak and hole       | 0.542 and -0.528 e.Å <sup>-3</sup>                                                                                  |

X-Ray Crystallographic Analysis of  
 $\{[(R,R)\text{-QuinoxP}]\text{cobalt(I)}(\mu\text{-Br})\}_2$  (**18**)

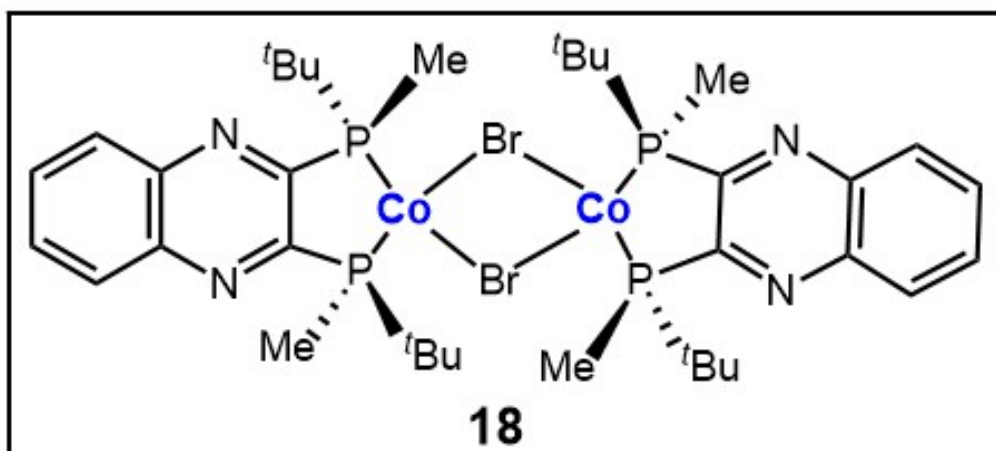



## **Experimental Summary for 18**

The single crystal X-ray diffraction studies were carried out on a Nonius Kappa diffractometer equipped with a Bruker APEX-II CCD and Mo K $_{\alpha}$  radiation ( $\lambda = 0.71073 \text{ \AA}$ ). A 0.273 x 0.254 x 0.216 mm piece of a green block was mounted on a MiTeGen Micromount with CHRISTO-LUBE MCG 1024 oil. Data were collected in a nitrogen gas stream at 100(2) K using  $\phi$  and  $\omega$  scans. Crystal-to-detector distance was 80 mm and exposure time was 10 seconds per frame using a scan width of  $0.75^{\circ}$ . Data collection was 100% complete to  $25.00^{\circ}$  in  $\theta$ . A total of 126335 reflections were collected covering the indices,  $-11 \leq h \leq 11$ ,  $-11 \leq k \leq 11$ ,  $-53 \leq l \leq 58$ . 4353 reflections were found to be symmetry independent, with a  $R_{\text{int}}$  of 0.0507. Indexing and unit cell refinement indicated a primitive, tetragonal lattice. The space group was found to be  $P4_12_12$ . The data were integrated using the Bruker SAINT software program and scaled using the SADABS software program. Solution by direct methods (SHELXT) produced a complete phasing model consistent with the proposed structure.

All nonhydrogen atoms were refined anisotropically by full-matrix least-squares (SHELXL-2014). All hydrogen atoms were placed using a riding model. Their positions were constrained relative to their parent atom using the appropriate HFIX command in SHELXL-2014. The absolute stereochemistry of the molecule was established by anomalous dispersion using the Parson's method with a Flack parameter of 0.009(2). Crystallographic data are summarized in **Table S8**.

● C  
● H  
● Br  
● Co  
● N  
● P

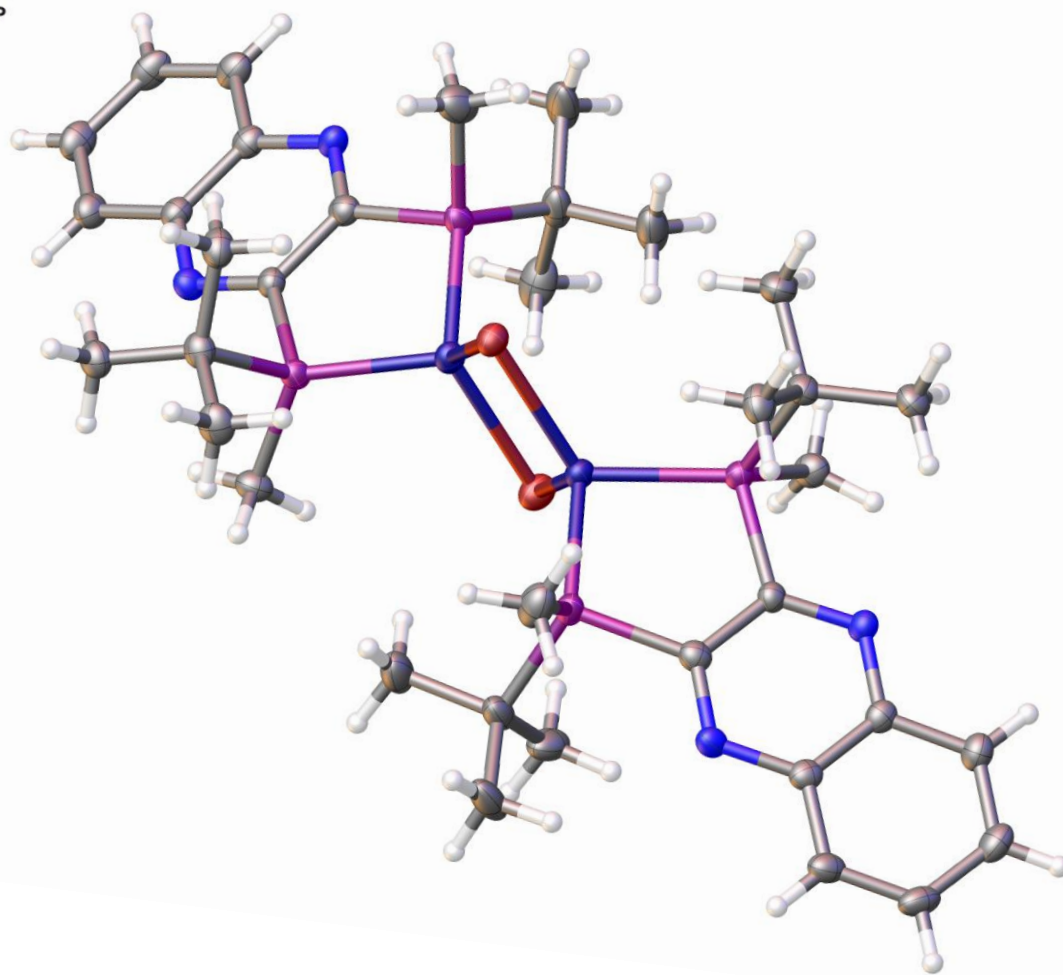

**Table S8.** Crystal data and structure refinement for RBabu\_MP-05-065 (**18**).

|                                   |                                                                                                   |
|-----------------------------------|---------------------------------------------------------------------------------------------------|
| Report date                       | 2019-08-13                                                                                        |
| Identification code               | MP-05-065                                                                                         |
| Empirical formula                 | C <sub>36</sub> H <sub>56</sub> Br <sub>2</sub> Co <sub>2</sub> N <sub>4</sub> P <sub>4</sub>     |
| Molecular formula                 | C <sub>36</sub> H <sub>56</sub> Br <sub>2</sub> Co <sub>2</sub> N <sub>4</sub> P <sub>4</sub>     |
| Formula weight                    | 946.40                                                                                            |
| Temperature                       | 100 K                                                                                             |
| Wavelength                        | 0.71073 Å                                                                                         |
| Crystal system                    | Tetragonal                                                                                        |
| Space group                       | P4 <sub>1</sub> 2 <sub>1</sub> 2                                                                  |
| Unit cell dimensions              | a = 9.5542(2) Å      α = 90°.<br>b = 9.5542(2) Å      β = 90°.<br>c = 46.3014(12) Å      γ = 90°. |
| Volume                            | 4226.5(2) Å <sup>3</sup>                                                                          |
| Z                                 | 4                                                                                                 |
| Density (calculated)              | 1.487 Mg/m <sup>3</sup>                                                                           |
| Absorption coefficient            | 2.857 mm <sup>-1</sup>                                                                            |
| F(000)                            | 1936                                                                                              |
| Crystal size                      | 0.273 x 0.254 x 0.216 mm <sup>3</sup>                                                             |
| Crystal color, habit              | Green Block                                                                                       |
| Theta range for data collection   | 1.759 to 26.470°.                                                                                 |
| Index ranges                      | -11 ≤ h ≤ 11, -11 ≤ k ≤ 11, -53 ≤ l ≤ 58                                                          |
| Reflections collected             | 126335                                                                                            |
| Independent reflections           | 4353 [R(int) = 0.0507, R(sigma) = 0.0213]                                                         |
| Completeness to theta = 25.000°   | 100.0 %                                                                                           |
| Absorption correction             | Semi-empirical from equivalents                                                                   |
| Max. and min. transmission        | 0.2602 and 0.2138                                                                                 |
| Refinement method                 | Full-matrix least-squares on F <sup>2</sup>                                                       |
| Data / restraints / parameters    | 4353 / 0 / 226                                                                                    |
| Goodness-of-fit on F <sup>2</sup> | 1.073                                                                                             |
| Final R indices [I > 2σ(I)]       | R1 = 0.0236, wR2 = 0.0557                                                                         |
| R indices (all data)              | R1 = 0.0267, wR2 = 0.0563                                                                         |
| Absolute structure parameter      | 0.009(2)                                                                                          |
| Extinction coefficient            | n/a                                                                                               |
| Largest diff. peak and hole       | 0.467 and -0.199 e.Å <sup>-3</sup>                                                                |

X-Ray Crystallographic Analysis of  
 $\{[(S,S)\text{-Ph-BPE}]\text{cobalt(I)}(\mu\text{-Br})\}_2$  (**19**)

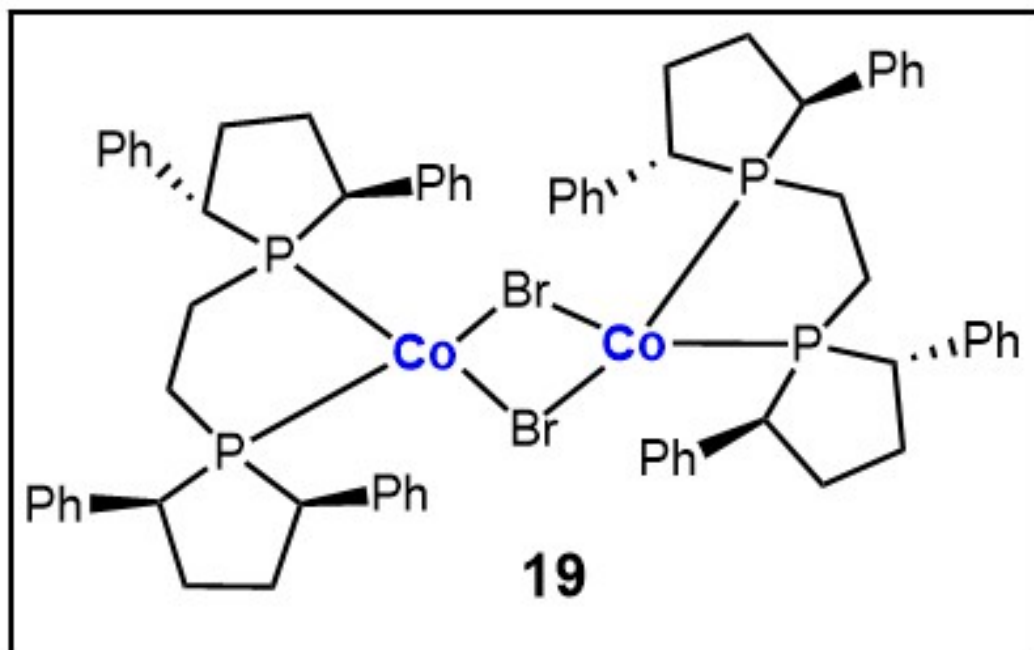

## **Experimental Summary for 19**

The single crystal X-ray diffraction studies were carried out on a Nonius Kappa diffractometer equipped with a Bruker APEX-II CCD and Mo K $_{\alpha}$  radiation ( $\lambda = 0.71073 \text{ \AA}$ ). A 0.157 x 0.146 x 0.092 mm piece of a dark green block was mounted on a MiTeGen Micromount with CHRISTO-LUBE MCG 1024 oil. Data were collected in a nitrogen gas stream at 100(2) K using  $\phi$  and  $\omega$  scans. Crystal-to-detector distance was 80 mm and exposure time was 30 seconds per frame using a scan width of 0.75°. Data collection was 99.8% complete to 23.291° in  $\theta$ , 0.90Å. A total of 319126 reflections were collected covering the indices,  $-16 \leq h \leq 22$ ,  $-23 \leq k \leq 23$ ,  $-58 \leq l \leq 58$ . 17222 reflections were found to be symmetry independent, with a  $R_{\text{int}}$  of 0.1535. Indexing and unit cell refinement indicated a primitive, tetragonal lattice. The space group was found to be  $P4_32_12$ . The data were integrated using the Bruker SAINT software program and scaled using the SADABS software program. Solution by direct methods (SHELXT) produced a complete phasing model consistent with the proposed structure.

All nonhydrogen atoms were refined anisotropically by full-matrix least-squares (SHELXL-2014). All hydrogen atoms were placed using a riding model. Their positions were constrained relative to their parent atom using the appropriate HFIX command in SHELXL-2014. The absolute stereochemistry of the molecule was established by anomalous dispersion using the Parson's method with a Flack parameter of 0.006(5). Crystallographic data are summarized in **Table S9**.

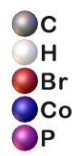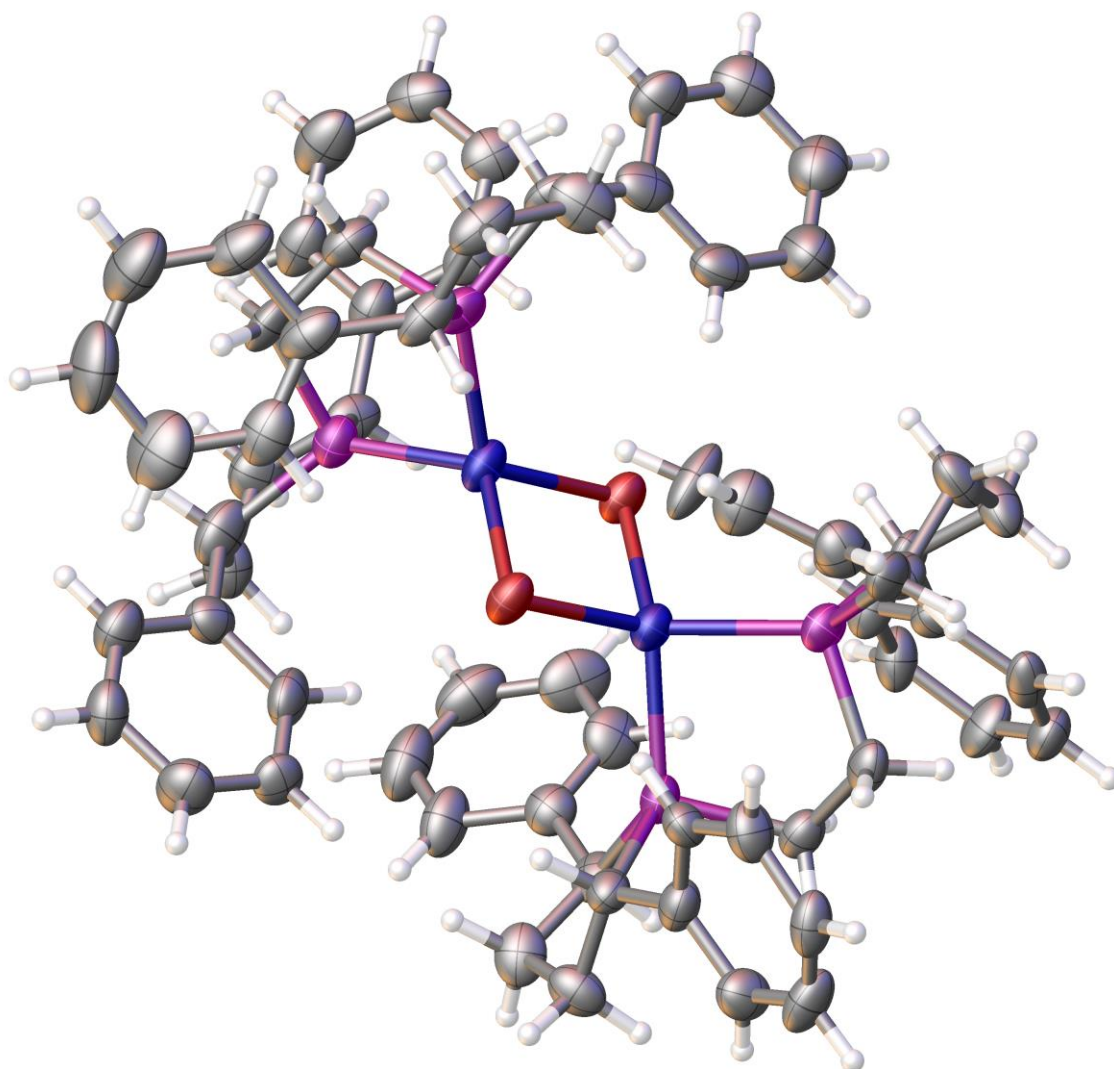

**Table S9.** Crystal data and structure refinement for RBabu\_MP-05-066 (19).

|                                   |                                                                                                   |
|-----------------------------------|---------------------------------------------------------------------------------------------------|
| Report date                       | 2019-08-16                                                                                        |
| Identification code               | MP-05-066                                                                                         |
| Empirical formula                 | C <sub>68</sub> H <sub>72</sub> Br <sub>2</sub> Co <sub>2</sub> P <sub>4</sub>                    |
| Molecular formula                 | C <sub>68</sub> H <sub>72</sub> Br <sub>2</sub> Co <sub>2</sub> P <sub>4</sub>                    |
| Formula weight                    | 1290.81                                                                                           |
| Temperature                       | 100.0 K                                                                                           |
| Wavelength                        | 0.71073 Å                                                                                         |
| Crystal system                    | Tetragonal                                                                                        |
| Space group                       | P4 <sub>3</sub> 2 <sub>1</sub> 2                                                                  |
| Unit cell dimensions              | a = 21.2718(9) Å      α = 90°.<br>b = 21.2718(9) Å      β = 90°.<br>c = 52.873(2) Å      γ = 90°. |
| Volume                            | 23925(2) Å <sup>3</sup>                                                                           |
| Z                                 | 16                                                                                                |
| Density (calculated)              | 1.433 Mg/m <sup>3</sup>                                                                           |
| Absorption coefficient            | 2.039 mm <sup>-1</sup>                                                                            |
| F(000)                            | 10624                                                                                             |
| Crystal size                      | 0.157 x 0.146 x 0.092 mm <sup>3</sup>                                                             |
| Crystal color, habit              | Dark Green Block                                                                                  |
| Theta range for data collection   | 1.032 to 23.291°.                                                                                 |
| Index ranges                      | -16<=h<=22, -23<=k<=23, -58<=l<=58                                                                |
| Reflections collected             | 319126                                                                                            |
| Independent reflections           | 17222 [R(int) = 0.1535, R(sigma) = 0.0650]                                                        |
| Completeness to theta = 23.291°   | 99.8 %                                                                                            |
| Absorption correction             | Semi-empirical from equivalents                                                                   |
| Max. and min. transmission        | 0.0243 and 0.0078                                                                                 |
| Refinement method                 | Full-matrix least-squares on F <sup>2</sup>                                                       |
| Data / restraints / parameters    | 17222 / 0 / 1369                                                                                  |
| Goodness-of-fit on F <sup>2</sup> | 1.078                                                                                             |
| Final R indices [I>2sigma(I)]     | R1 = 0.0693, wR2 = 0.1500                                                                         |
| R indices (all data)              | R1 = 0.0982, wR2 = 0.1638                                                                         |
| Absolute structure parameter      | 0.006(5)                                                                                          |
| Extinction coefficient            | n/a                                                                                               |
| Largest diff. peak and hole       | 1.797 and -0.525 e.Å <sup>-3</sup>                                                                |

X-Ray Crystallographic Analysis of  
[bis(N-aryliminoethyl- $\kappa$ N,N')pyridine-  
N]CoCl (**22**)

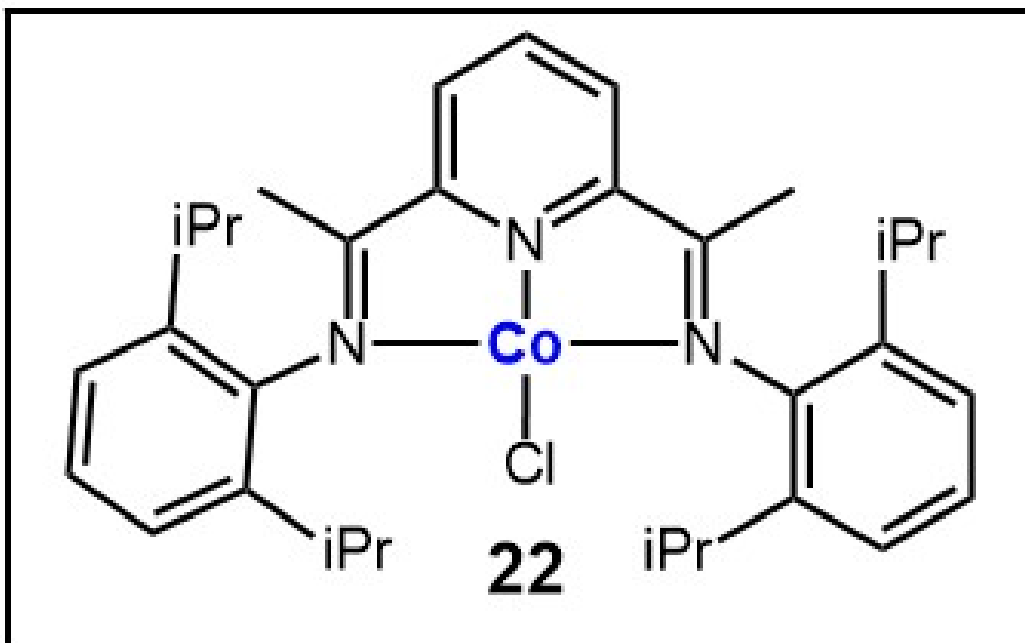



## **Experimental Summary for 22**

The single crystal X-ray diffraction studies were carried out on a Nonius Kappa diffractometer equipped with a Bruker APEX-II CCD and Mo K $_{\alpha}$  radiation ( $\lambda = 0.71073 \text{ \AA}$ ). A 0.286 x 0.274 x 0.209 mm piece of a purple block was mounted on a MiTeGen Micromount with CHRISTO-LUBE MCG 1024 oil. Data were collected in a nitrogen gas stream at 100(2) K using  $\phi$  and  $\omega$  scans. Crystal-to-detector distance was 40 mm and exposure time was 5 seconds per frame using a scan width of  $0.75^{\circ}$ . Data collection was 100% complete to  $25.00^{\circ}$  in  $\theta$ . A total of 21780 reflections were collected covering the indices,  $-10 \leq h \leq 10$ ,  $-28 \leq k \leq 28$ ,  $-11 \leq l \leq 19$ . 6221 reflections were found to be symmetry independent, with a  $R_{\text{int}}$  of 0.0475. Indexing and unit cell refinement indicated a primitive, monoclinic lattice. The space group was found to be  $P2_1/n$ . The data were integrated using the Bruker SAINT software program and scaled using the SADABS software program. Solution by direct methods (SHELXT) produced a complete phasing model consistent with the proposed structure.

All nonhydrogen atoms were refined anisotropically by full-matrix least-squares (SHELXL-2014). All hydrogen atoms were placed using a riding model. Their positions were constrained relative to their parent atom using the appropriate HFIX command in SHELXL-2014. Crystallographic data are summarized in **Table S10**.

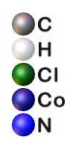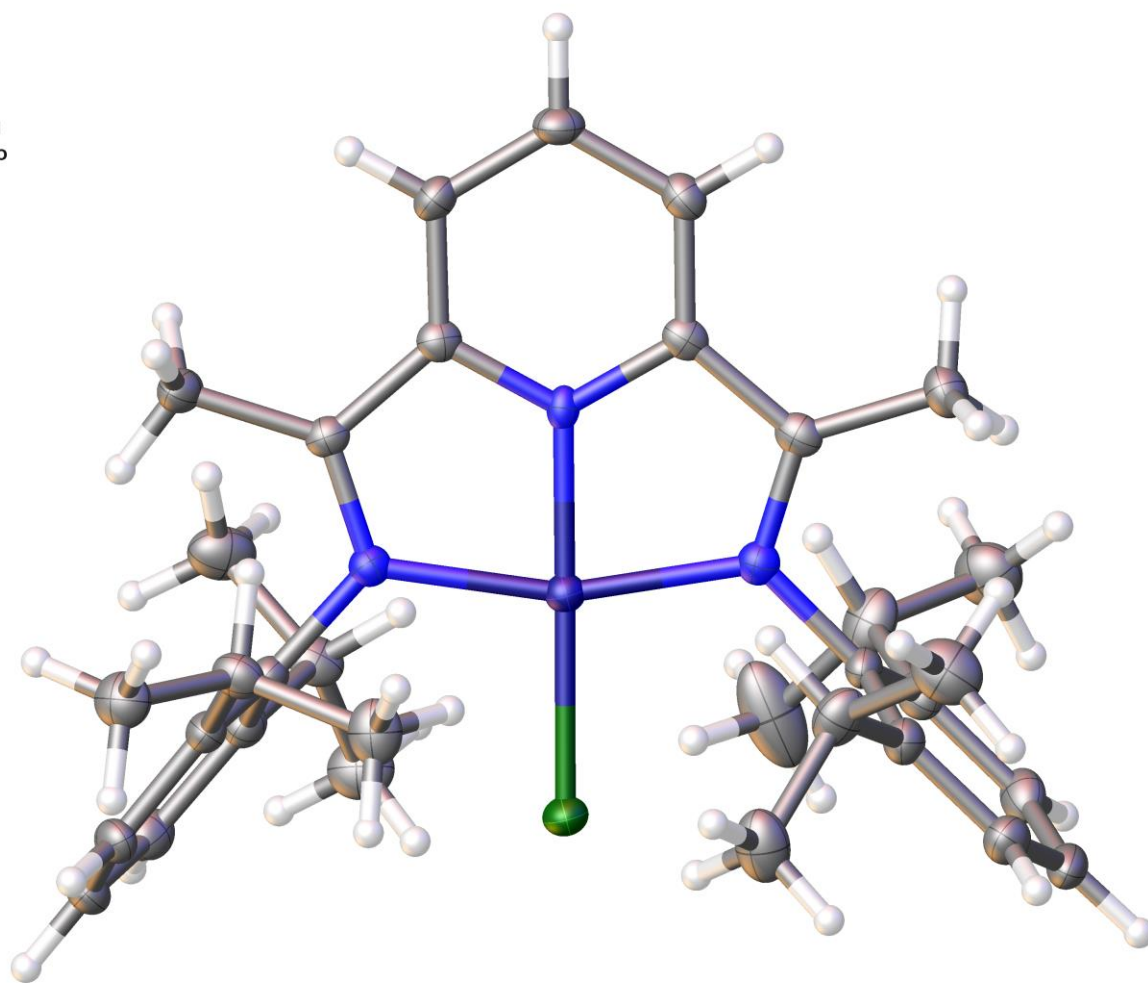

**Table S10.** Crystal data and structure refinement for RBabu\_MP-05-075.

|                                   |                                             |                              |
|-----------------------------------|---------------------------------------------|------------------------------|
| Report date                       | 2019-08-16                                  |                              |
| Identification code               | MP-05-075                                   |                              |
| Empirical formula                 | C33 H43 Cl Co N3                            |                              |
| Molecular formula                 | C33 H43 Cl Co N3                            |                              |
| Formula weight                    | 576.08                                      |                              |
| Temperature                       | 100 K                                       |                              |
| Wavelength                        | 0.71073 Å                                   |                              |
| Crystal system                    | Monoclinic                                  |                              |
| Space group                       | P 1 21/n 1                                  |                              |
| Unit cell dimensions              | a = 8.7386(6) Å                             | $\alpha = 90^\circ$ .        |
|                                   | b = 22.8891(16) Å                           | $\beta = 101.295(2)^\circ$ . |
|                                   | c = 15.5231(11) Å                           | $\gamma = 90^\circ$ .        |
| Volume                            | 3044.8(4) Å <sup>3</sup>                    |                              |
| Z                                 | 4                                           |                              |
| Density (calculated)              | 1.257 Mg/m <sup>3</sup>                     |                              |
| Absorption coefficient            | 0.677 mm <sup>-1</sup>                      |                              |
| F(000)                            | 1224                                        |                              |
| Crystal size                      | 0.286 x 0.274 x 0.209 mm <sup>3</sup>       |                              |
| Crystal color, habit              | Purple Block                                |                              |
| Theta range for data collection   | 1.607 to 26.396°.                           |                              |
| Index ranges                      | -10<=h<=10, -28<=k<=28, -11<=l<=19          |                              |
| Reflections collected             | 21780                                       |                              |
| Independent reflections           | 6221 [R(int) = 0.0475, R(sigma) = 0.0655]   |                              |
| Completeness to theta = 25.242°   | 100.0 %                                     |                              |
| Absorption correction             | Semi-empirical from equivalents             |                              |
| Max. and min. transmission        | 0.2602 and 0.2116                           |                              |
| Refinement method                 | Full-matrix least-squares on F <sup>2</sup> |                              |
| Data / restraints / parameters    | 6221 / 0 / 353                              |                              |
| Goodness-of-fit on F <sup>2</sup> | 1.028                                       |                              |
| Final R indices [I>2sigma(I)]     | R1 = 0.0432, wR2 = 0.1027                   |                              |
| R indices (all data)              | R1 = 0.0683, wR2 = 0.1108                   |                              |
| Extinction coefficient            | n/a                                         |                              |
| Largest diff. peak and hole       | 0.938 and -0.298 e.Å <sup>-3</sup>          |                              |

X-Ray Crystallographic Analysis of  
{[(R,R)-QuinoxP]cobalt(I)(eta-6 -C6D6)}  
+[BArF]<sup>-</sup> (**23**)

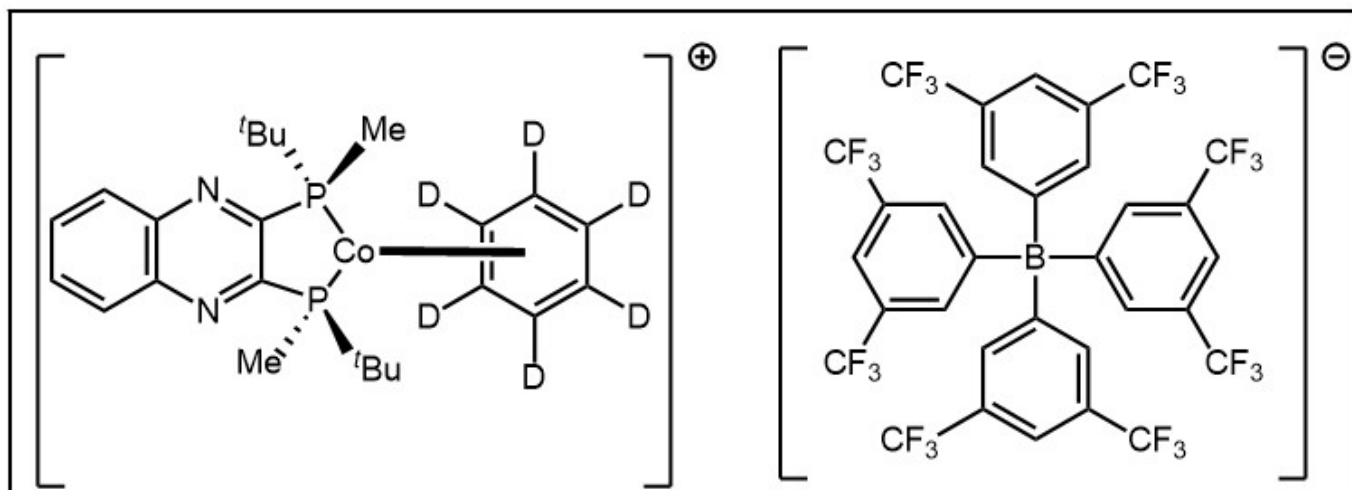

### **Experimental Summary for 23**

The single crystal X-ray diffraction studies were carried out on a Bruker Kappa Photon II CPAD diffractometer equipped with Mo K $_{\alpha}$  radiation ( $\lambda = 0.71073 \text{ \AA}$ ). A 0.315 x 0.228 x 0.154 mm piece of a purple block was mounted on a MiTeGen Micromount with Paratone 24EX oil. Data were collected in a nitrogen gas stream at 100(2) K using  $\phi$  and  $\omega$  scans. Crystal-to-detector distance was 60 mm and exposure time was 10 seconds per frame using a scan width of 1.0°. Data collection was 99.8% complete to 25.00° in  $\theta$ . A total of 124192 reflections were collected covering the indices,  $-17 \leq h \leq 17$ ,  $-18 \leq k \leq 18$ ,  $-21 \leq l \leq 21$ . 23621 reflections were found to be symmetry independent, with a  $R_{\text{int}}$  of 0.0381. Indexing and unit cell refinement indicated a primitive, triclinic lattice. The space group was found to be  $P1$ . The data were integrated using the Bruker SAINT software program and scaled using the SADABS software program. Solution by direct methods (SHELXT) produced a complete phasing model for refinement.

All nonhydrogen atoms were refined anisotropically by full-matrix least-squares (SHELXL-2014). All hydrogen atoms were placed using a riding model. Their positions were constrained relative to their parent atom using the appropriate HFIX command in SHELXL-2014. The absolute stereochemistry of the molecule was established by anomalous dispersion using the Parson's method with a Flack parameter of 0.005(3). Crystallographic data are summarized in **Table S11**.

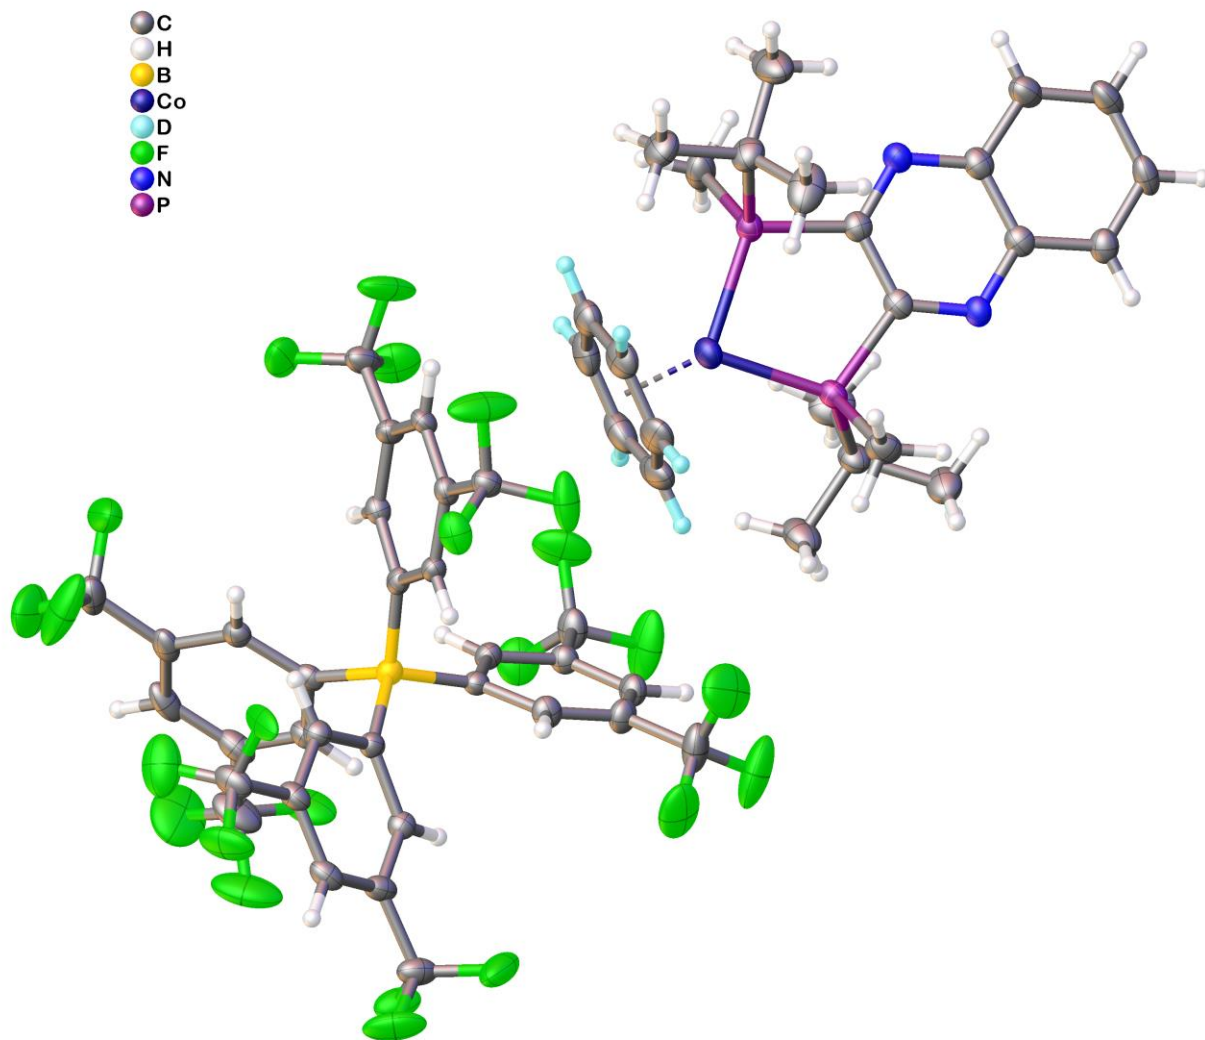

**Table S11.** Crystal data and structure refinement for RBabu\_MP-05-156 (23).

|                                   |                                             |                                 |
|-----------------------------------|---------------------------------------------|---------------------------------|
| Report date                       | 2020-07-13                                  |                                 |
| Identification code               | MP-05-156                                   |                                 |
| Empirical formula                 | C56 H40 B Co D6 F24 N2 P2                   |                                 |
| Molecular formula                 | C24 H28 Co D6 N2 P2, C32 H12 B F24          |                                 |
| Formula weight                    | 1340.66                                     |                                 |
| Temperature                       | 100.0 K                                     |                                 |
| Wavelength                        | 0.71073 Å                                   |                                 |
| Crystal system                    | Triclinic                                   |                                 |
| Space group                       | P1                                          |                                 |
| Unit cell dimensions              | a = 13.7516(7) Å                            | $\alpha = 106.052(2)^\circ$ .   |
|                                   | b = 14.4882(7) Å                            | $\beta = 102.166(2)^\circ$ .    |
|                                   | c = 17.3962(9) Å                            | $\gamma = 111.9630(10)^\circ$ . |
| Volume                            | 2890.8(3) Å <sup>3</sup>                    |                                 |
| Z                                 | 2                                           |                                 |
| Density (calculated)              | 1.540 Mg/m <sup>3</sup>                     |                                 |
| Absorption coefficient            | 0.469 mm <sup>-1</sup>                      |                                 |
| F(000)                            | 1348                                        |                                 |
| Crystal size                      | 0.315 x 0.228 x 0.154 mm <sup>3</sup>       |                                 |
| Crystal color, habit              | Purple Block                                |                                 |
| Theta range for data collection   | 2.915 to 26.433°.                           |                                 |
| Index ranges                      | -17<=h<=17, -18<=k<=18, -21<=l<=21          |                                 |
| Reflections collected             | 124192                                      |                                 |
| Independent reflections           | 23621 [R(int) = 0.0381, R(sigma) = 0.0363]  |                                 |
| Completeness to theta = 25.000°   | 99.8 %                                      |                                 |
| Absorption correction             | Semi-empirical from equivalents             |                                 |
| Max. and min. transmission        | 0.0932 and 0.0678                           |                                 |
| Refinement method                 | Full-matrix least-squares on F <sup>2</sup> |                                 |
| Data / restraints / parameters    | 23621 / 156 / 1662                          |                                 |
| Goodness-of-fit on F <sup>2</sup> | 1.016                                       |                                 |
| Final R indices [I>2sigma(I)]     | R1 = 0.0333, wR2 = 0.0722                   |                                 |
| R indices (all data)              | R1 = 0.0419, wR2 = 0.0763                   |                                 |
| Absolute structure parameter      | 0.005(3)                                    |                                 |
| Extinction coefficient            | n/a                                         |                                 |
| Largest diff. peak and hole       | 0.469 and -0.291 e.Å <sup>-3</sup>          |                                 |

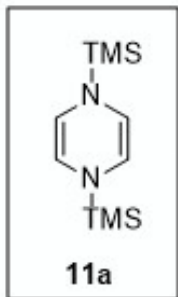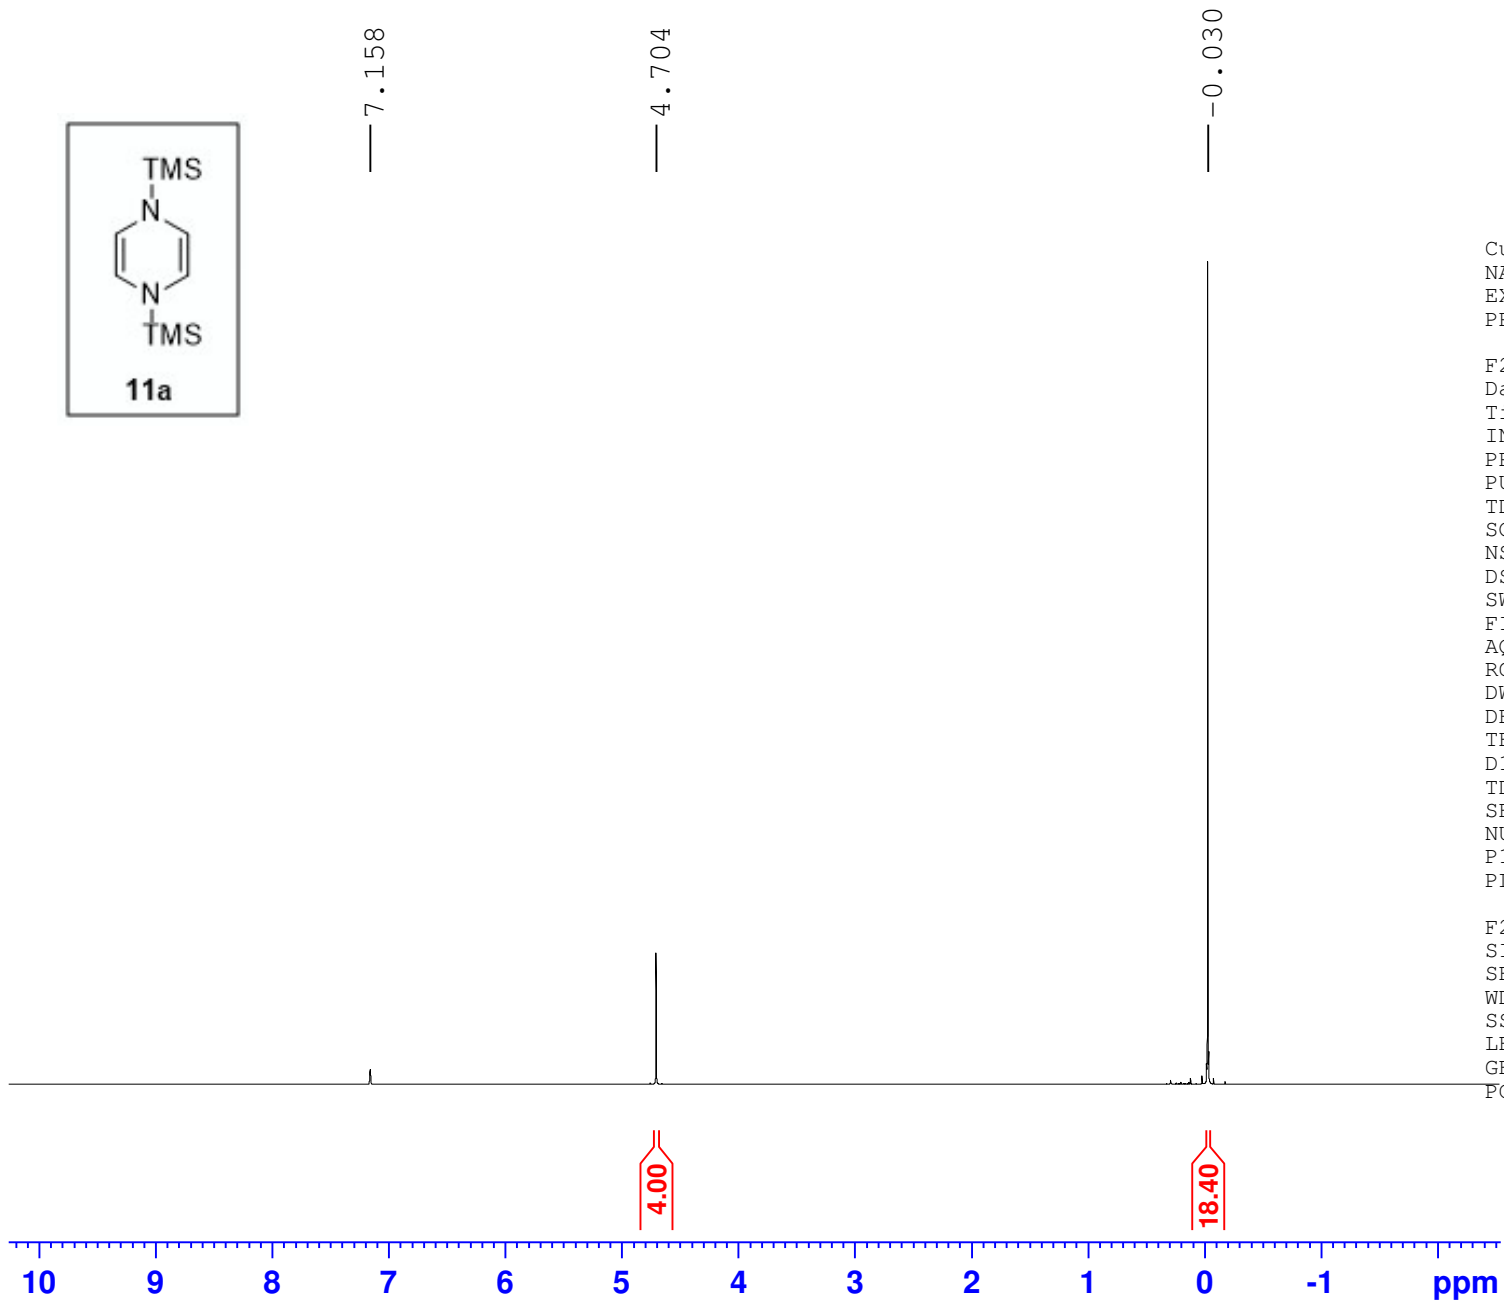

Current Data Parameters  
 NAME MP-01-BTDHPY-PURE  
 EXPNO 1  
 PROCNO 1

F2 - Acquisition Parameters  
 Date\_ 20191125  
 Time 18.15 h  
 INSTRUM spect  
 PROBHD Z108618\_0433 (  
 PULPROG zg30  
 TD 65536  
 SOLVENT C6D6  
 NS 16  
 DS 2  
 SWH 8223.685 Hz  
 FIDRES 0.250967 Hz  
 AQ 3.9845889 sec  
 RG 177.74  
 DW 60.800 usec  
 DE 6.50 usec  
 TE 300.0 K  
 D1 1.00000000 sec  
 TD0 1  
 SFO1 400.1724712 MHz  
 NUC1 1H  
 P1 15.00 usec  
 PLW1 13.19999981 W

F2 - Processing parameters  
 SI 65536  
 SF 400.1699979 MHz  
 WDW EM  
 SSB 0  
 LB 0.30 Hz  
 GB 0  
 PC 1.00



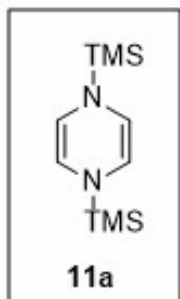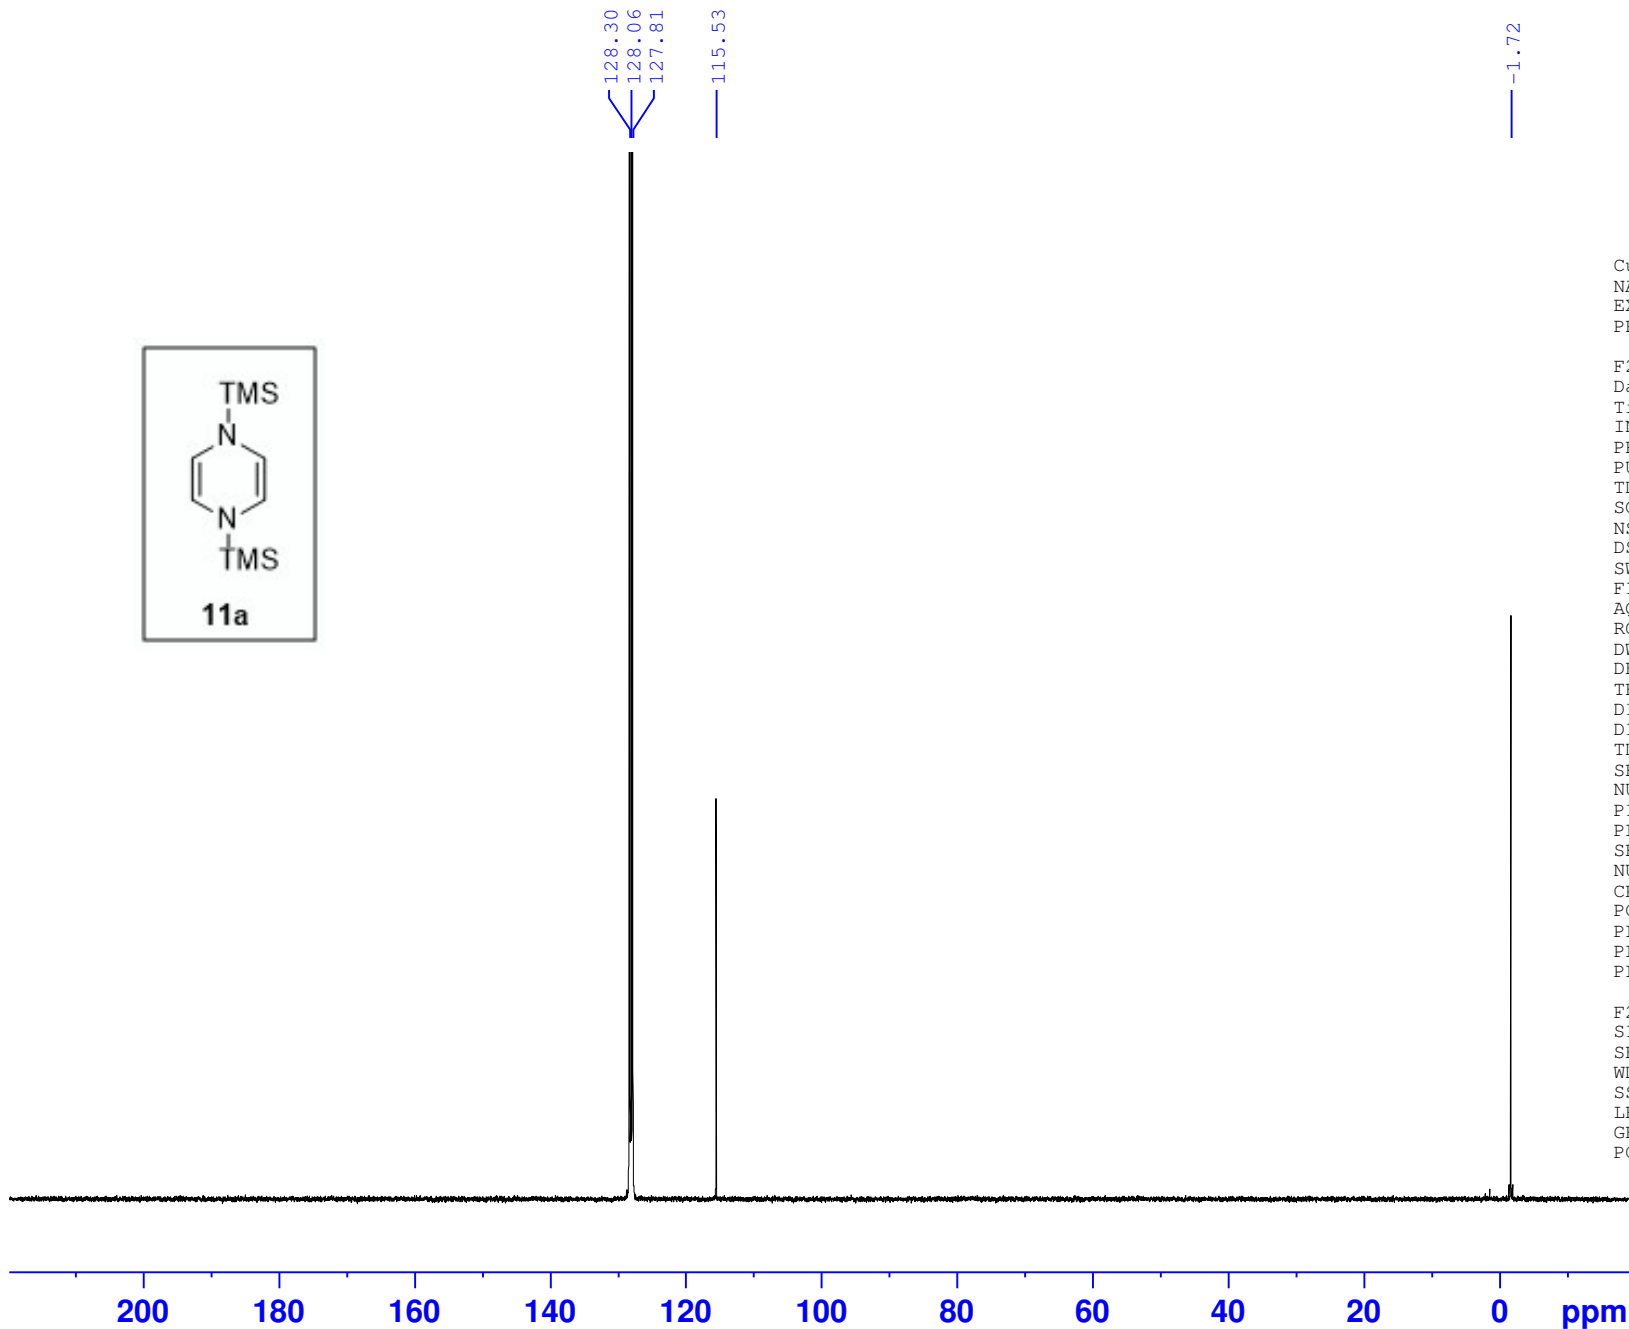

Current Data Parameters  
 NAME MP-01-BTDHPY-PURE  
 EXPNO 3  
 PROCNO 1

F2 - Acquisition Parameters  
 Date\_ 20191126  
 Time 3.41 h  
 INSTRUM spect  
 PROBHD Z108618\_0433 ( )  
 PULPROG zgpg30  
 TD 65536  
 SOLVENT C6D6  
 NS 1024  
 DS 4  
 SWH 24038.461 Hz  
 FIDRES 0.733596 Hz  
 AQ 1.3631488 sec  
 RG 2050  
 DW 20.800 usec  
 DE 6.50 usec  
 TE 300.4 K  
 D1 2.00000000 sec  
 D11 0.03000000 sec  
 TD0 1  
 SFO1 100.6328888 MHz  
 NUC1 13C  
 P1 9.50 usec  
 PLW1 53.29999924 W  
 SFO2 400.1716007 MHz  
 NUC2 1H  
 CPDPRG[2] waltz16  
 PCPD2 90.00 usec  
 PLW2 14.60000038 W  
 PLW12 0.40555999 W  
 PLW13 0.20399000 W

F2 - Processing parameters  
 SI 32768  
 SF 100.6227885 MHz  
 WDW EM  
 SSB 0  
 LB 1.00 Hz  
 GB 0  
 PC 1.40

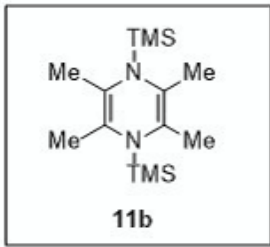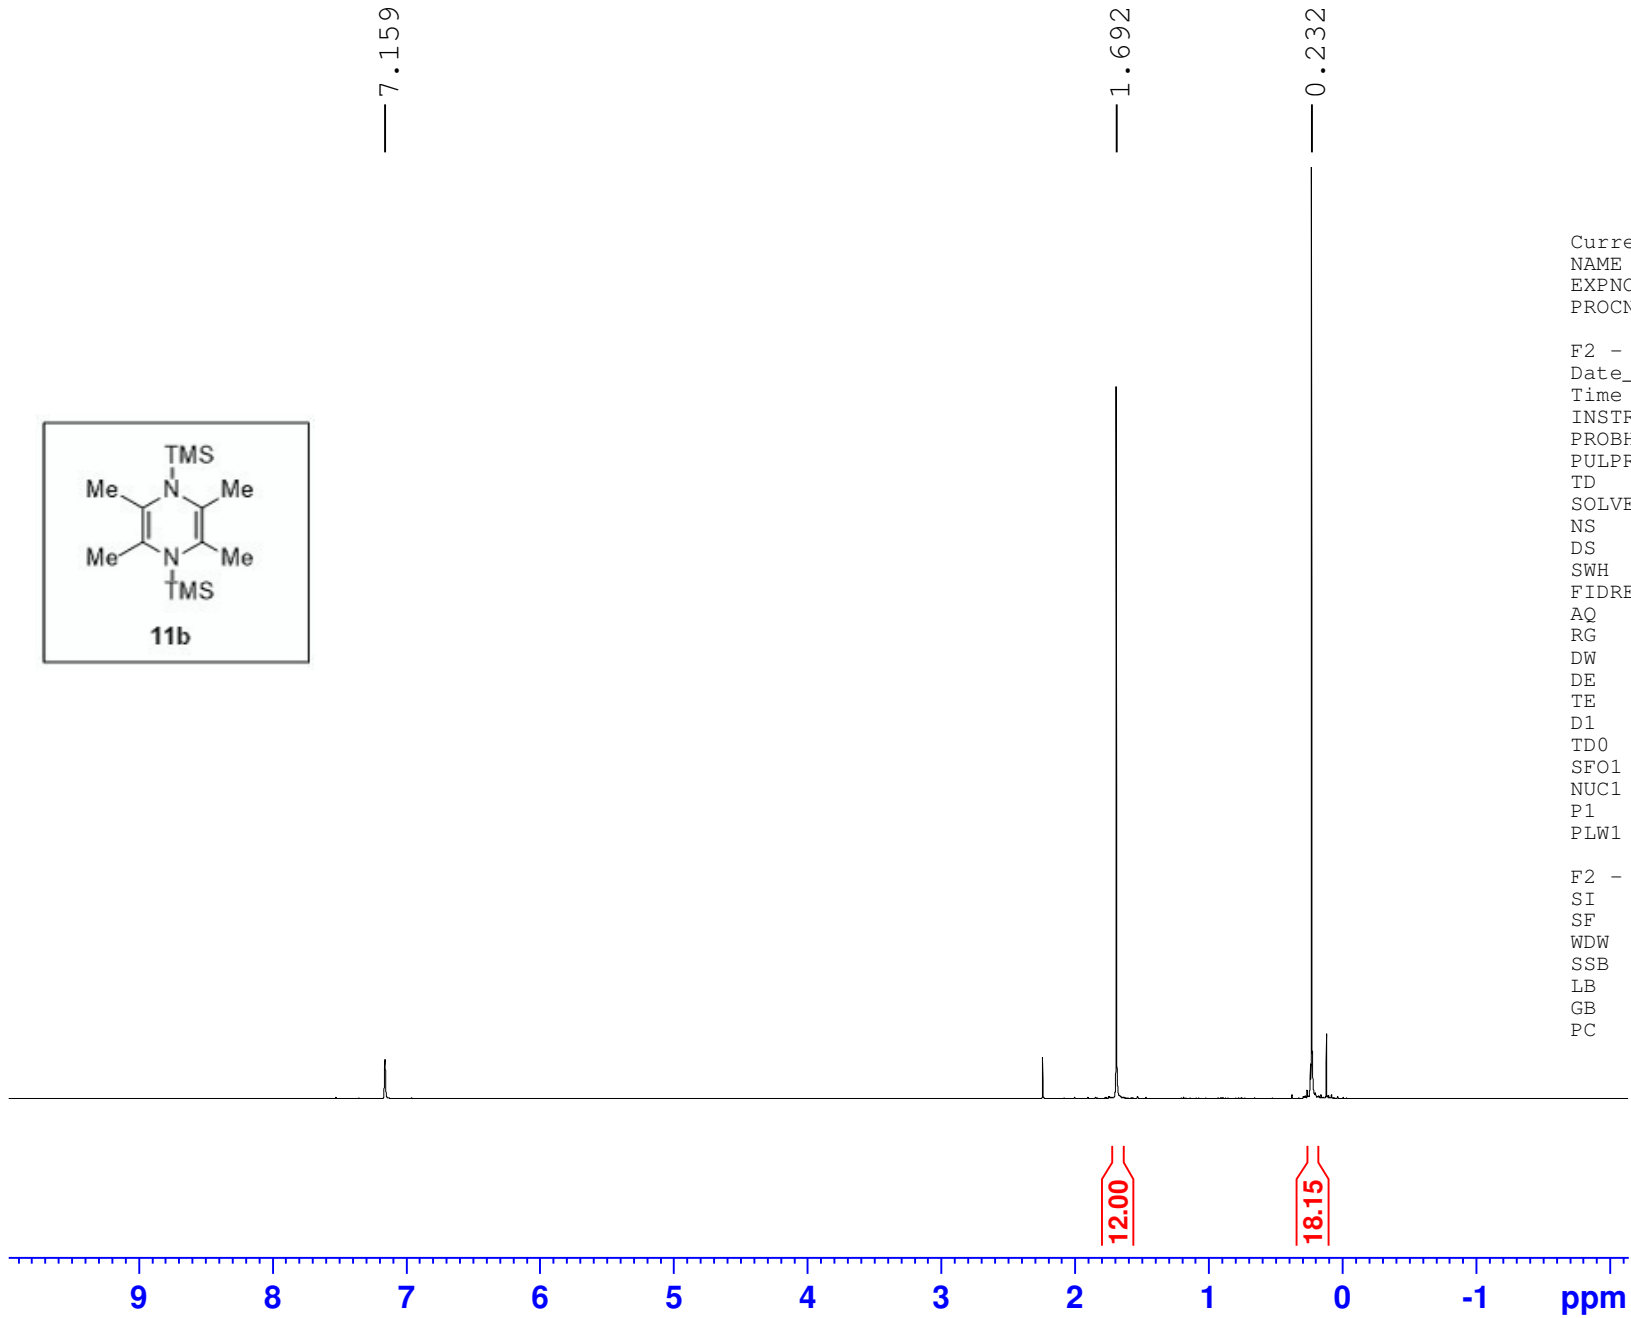

Current Data Parameters  
 NAME MP-01-TMBTMSPY-PURE  
 EXPNO 1  
 PROCNO 1

F2 - Acquisition Parameters  
 Date\_ 20191125  
 Time 18.20 h  
 INSTRUM spect  
 PROBHD Z108618\_0433 (  
 PULPROG zg30  
 TD 65536  
 SOLVENT C6D6  
 NS 16  
 DS 2  
 SWH 8223.685 Hz  
 FIDRES 0.250967 Hz  
 AQ 3.9845889 sec  
 RG 188.13  
 DW 60.800 usec  
 DE 6.50 usec  
 TE 300.0 K  
 D1 1.00000000 sec  
 TD0 1  
 SFO1 400.1724712 MHz  
 NUC1 1H  
 P1 15.00 usec  
 PLW1 13.19999981 W

F2 - Processing parameters  
 SI 65536  
 SF 400.1699976 MHz  
 WDW EM  
 SSB 0  
 LB 0.30 Hz  
 GB 0  
 PC 1.00

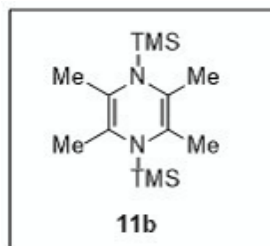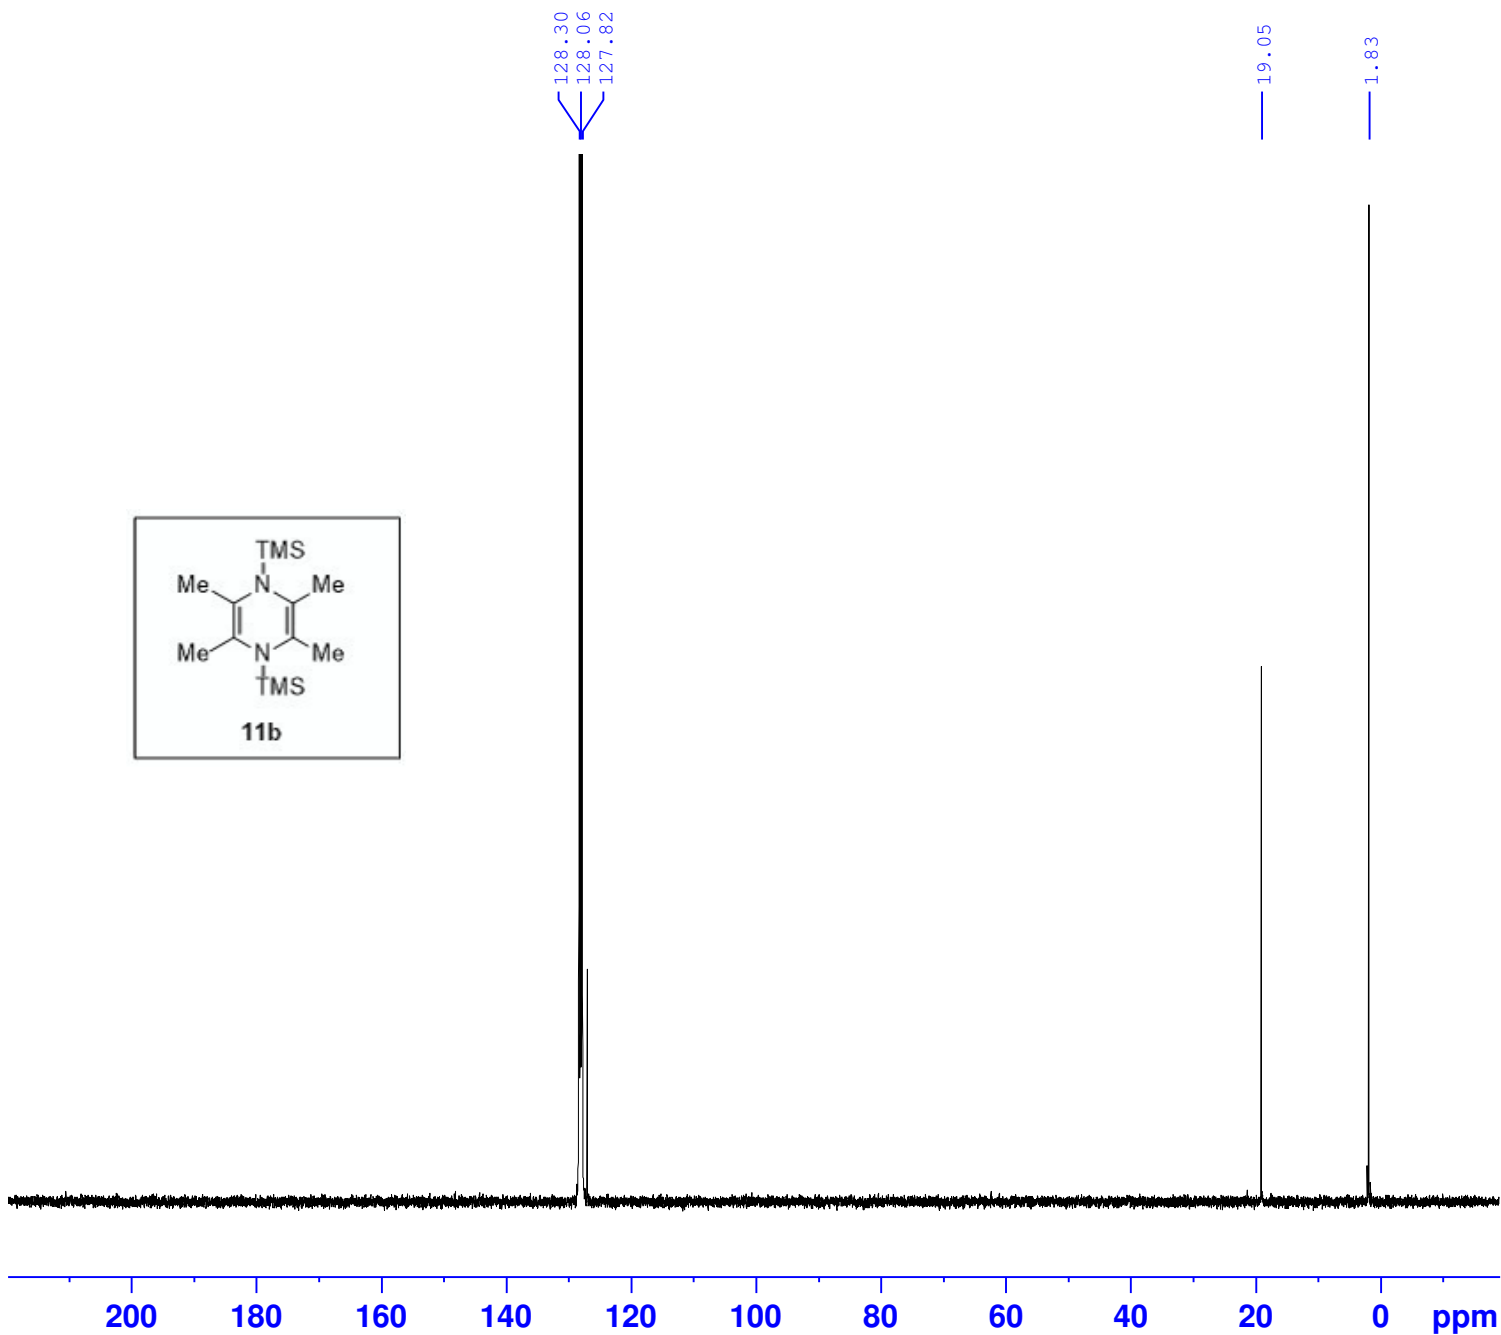

Current Data Parameters  
 NAME MP-01-TMBTMSPY-PURE  
 EXPNO 3  
 PROCNO 1

F2 - Acquisition Parameters  
 Date\_ 20191126  
 Time 5.15 h  
 INSTRUM spect  
 PROBHD Z108618\_0433 (  
 PULPROG zgpg30  
 TD 65536  
 SOLVENT C6D6  
 NS 1024  
 DS 4  
 SWH 24038.461 Hz  
 FIDRES 0.733596 Hz  
 AQ 1.3631488 sec  
 RG 2050  
 DW 20.800 usec  
 DE 6.50 usec  
 TE 300.2 K  
 D1 2.00000000 sec  
 D11 0.03000000 sec  
 TD0 1  
 SFO1 100.6328888 MHz  
 NUC1 13C  
 P1 9.50 usec  
 PLW1 53.29999924 W  
 SFO2 400.1716007 MHz  
 NUC2 1H  
 CPDPRG[2] waltz16  
 PCPD2 90.00 usec  
 PLW2 14.60000038 W  
 PLW12 0.40555999 W  
 PLW13 0.20399000 W

F2 - Processing parameters  
 SI 32768  
 SF 100.6227882 MHz  
 WDW EM  
 SSB 0  
 LB 1.00 Hz  
 GB 0  
 PC 1.40

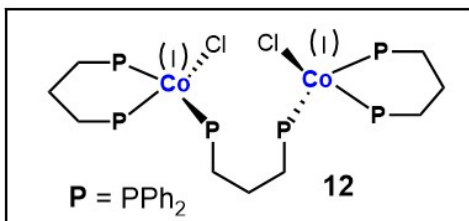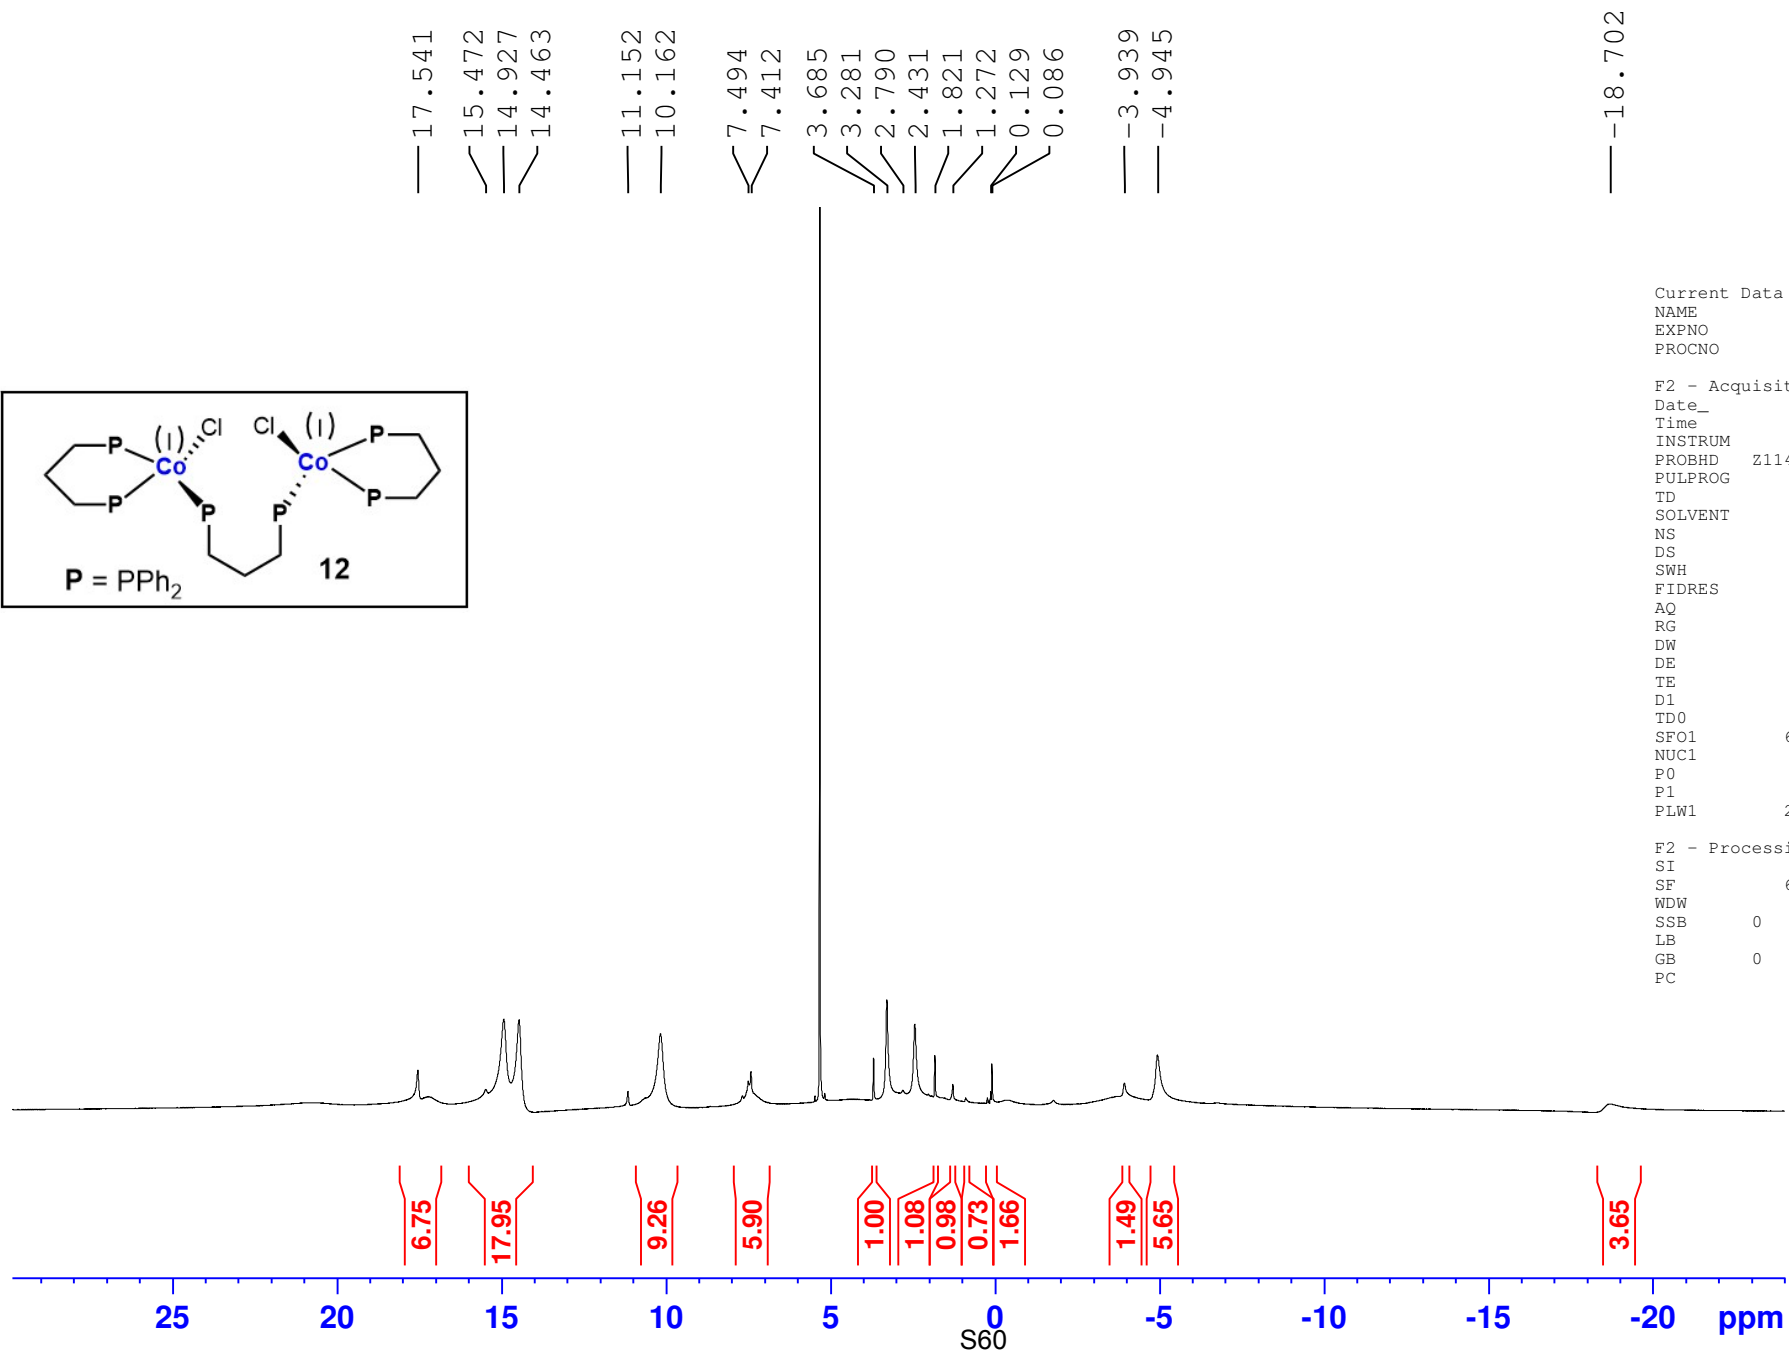

Current Data Parameters  
 NAME 01-11-2019  
 EXPNO 4  
 PROCNO 1

F2 - Acquisition Parameters  
 Date\_ 20190111  
 Time 11.27 h  
 INSTRUM spect  
 PROBHD Z114607\_0174 (  
 PULPROG zg30  
 TD 96152  
 SOLVENT CD2C12  
 NS 512  
 DS 2  
 SWH 119047.617 Hz  
 FIDRES 2.476238 Hz  
 AQ 0.4038384 sec  
 RG 104.7  
 DW 4.200 usec  
 DE 6.50 usec  
 TE 300.2 K  
 D1 1.00000000 sec  
 TD0 1  
 SFO1 600.2040072 MHz  
 NUC1 1H  
 P0 3.33 usec  
 P1 10.00 usec  
 PLW1 25.10000038 W

F2 - Processing parameters  
 SI 65536  
 SF 600.1800184 MHz  
 WDW EM  
 SSB 0  
 LB 0.30 Hz  
 GB 0  
 PC 1.00

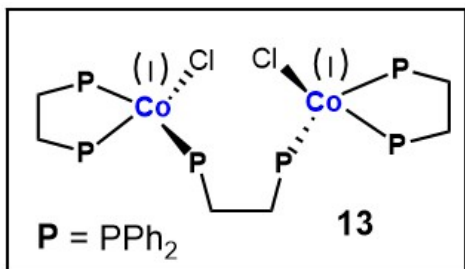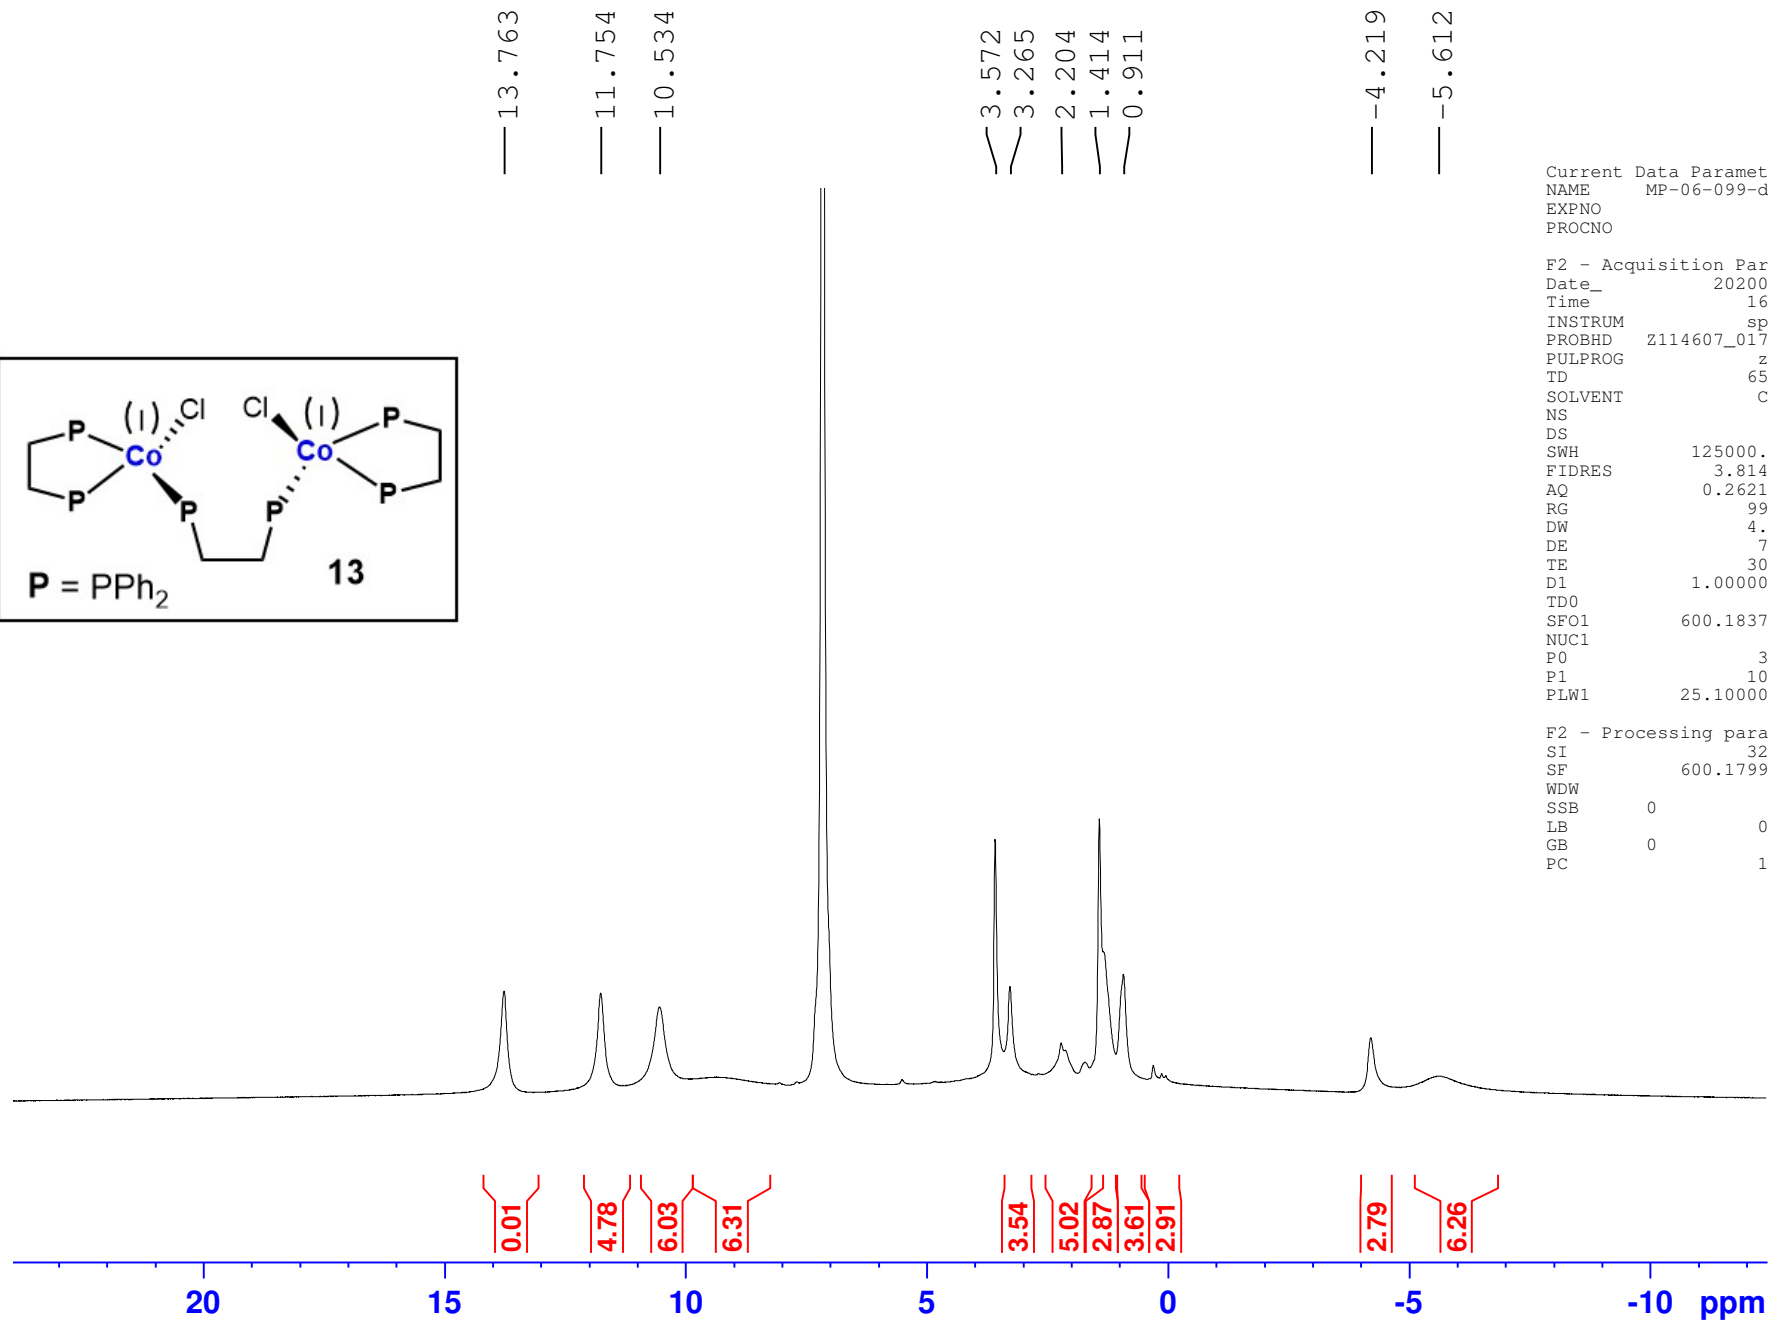

Current Data Parameters  
 NAME MP-06-099-dppe3Co2Cl2-C6D6  
 EXPNO 2  
 PROCNO 1

F2 - Acquisition Parameters  
 Date\_ 20200924  
 Time 16.51 h  
 INSTRUM spect  
 PROBHD Z114607\_0174 (  
 PULPROG zg30  
 TD 65536  
 SOLVENT C6D6  
 NS 512  
 DS 2  
 SWH 125000.000 Hz  
 FIDRES 3.814697 Hz  
 AQ 0.2621440 sec  
 RG 99.15  
 DW 4.000 usec  
 DE 7.02 usec  
 TE 300.0 K  
 D1 1.00000000 sec  
 TD0 1  
 SF01 600.1837061 MHz  
 NUC1 1H  
 P0 3.33 usec  
 P1 10.00 usec  
 PLW1 25.10000038 W

F2 - Processing parameters  
 SI 32768  
 SF 600.1799957 MHz  
 WDW EM  
 SSB 0  
 LB 0.30 Hz  
 GB 0  
 PC 1.00

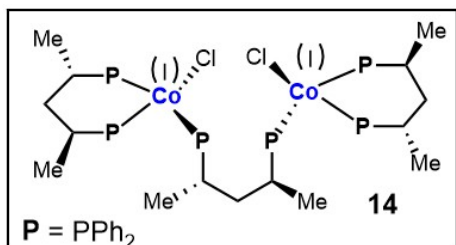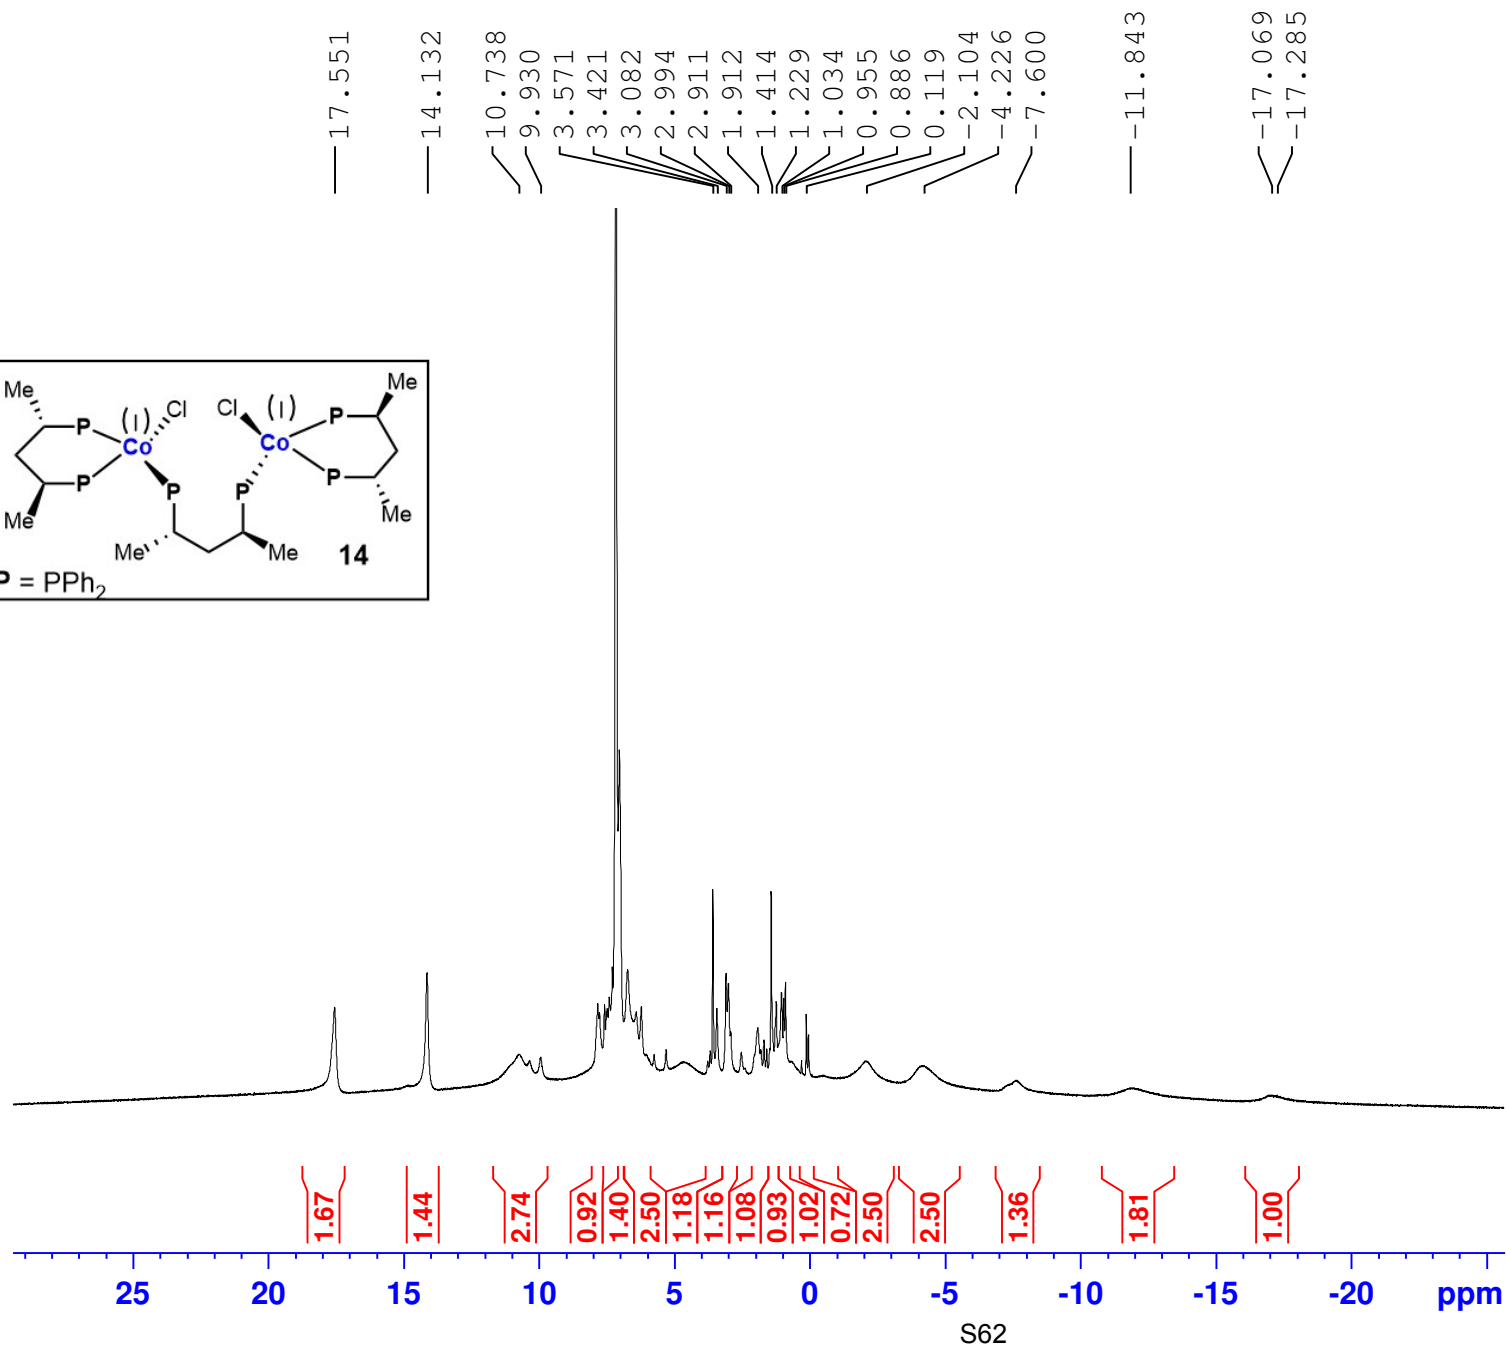

— 17.551  
— 14.132  
10.738  
9.930  
3.571  
3.421  
3.082  
2.994  
2.911  
1.912  
1.414  
1.229  
1.034  
0.955  
0.886  
0.119  
-2.104  
-4.226  
-7.600  
— -11.843  
-17.069  
-17.285

Current Data Parameters  
NAME MP-05-156-[ss-bdpp3Co2Cl2]  
EXPNO 2  
PROCNO 1

F2 - Acquisition Parameters

Date\_ 20191121  
Time 20.14 h  
INSTRUM spect  
PROBHD Z114607\_0174 (  
PULPROG zg30  
TD 84750  
SOLVENT C6D6  
NS 512  
DS 2  
SWH 119047.617 Hz  
FIDRES 2.809383 Hz  
AQ 0.3559500 sec  
RG 104.7  
DW 4.200 usec  
DE 6.50 usec  
TE 300.2 K  
D1 0.05900000 sec  
TD0 1  
SFO1 600.1800000 MHz  
NUC1 1H  
P0 3.33 usec  
P1 10.00 usec  
PLW1 25.10000038 W

F2 - Processing parameters

SI 65536  
SF 600.1799936 MHz  
WDW EM  
SSB 0  
LB 0.30 Hz  
GB 0  
PC 1.00

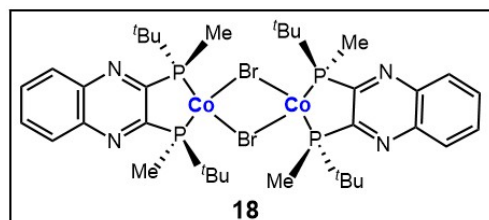

— 26.247

9.706  
8.844  
7.159  
3.040  
0.296  
0.121  
0.037

Current Data Parameters  
NAME MP-05-155  
EXPNO 1  
PROCNO 1

F2 - Acquisition Parameters  
Date\_ 20191121  
Time 17.42 h  
INSTRUM spect  
PROBHD Z114607\_0174 (  
PULPROG zg30  
TD 96152  
SOLVENT C6D6  
NS 256  
DS 2  
SWH 119047.617 Hz  
FIDRES 2.476238 Hz  
AQ 0.4038384 sec  
RG 104.7  
DW 4.200 usec  
DE 6.50 usec  
TE 300.2 K  
D1 1.00000000 sec  
TD0 1  
SFO1 600.1828251 MHz  
NUC1 1H  
P0 3.33 usec  
P1 10.00 usec  
PLW1 25.10000038 W

F2 - Processing parameters  
SI 65536  
SF 600.1799937 MHz  
WDW EM  
SSB 0  
LB 0.30 Hz  
GB 0  
PC 1.00

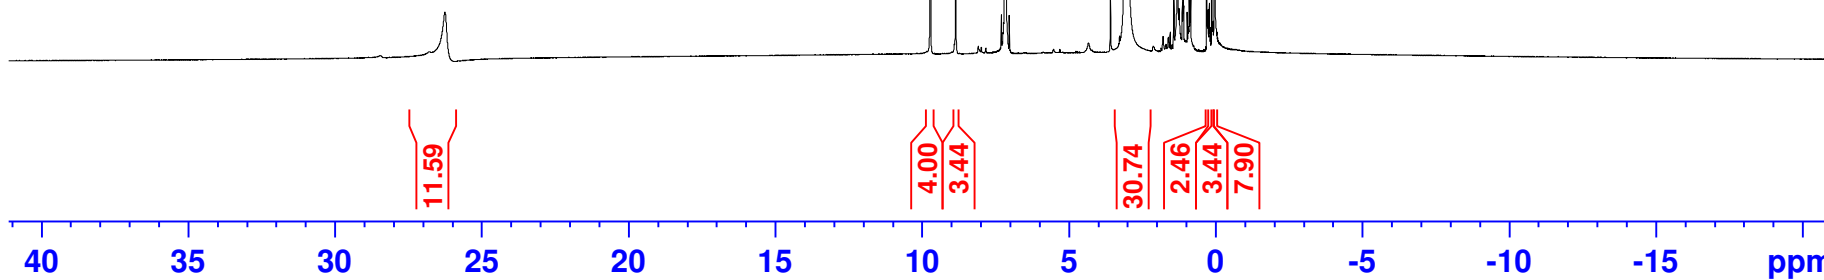

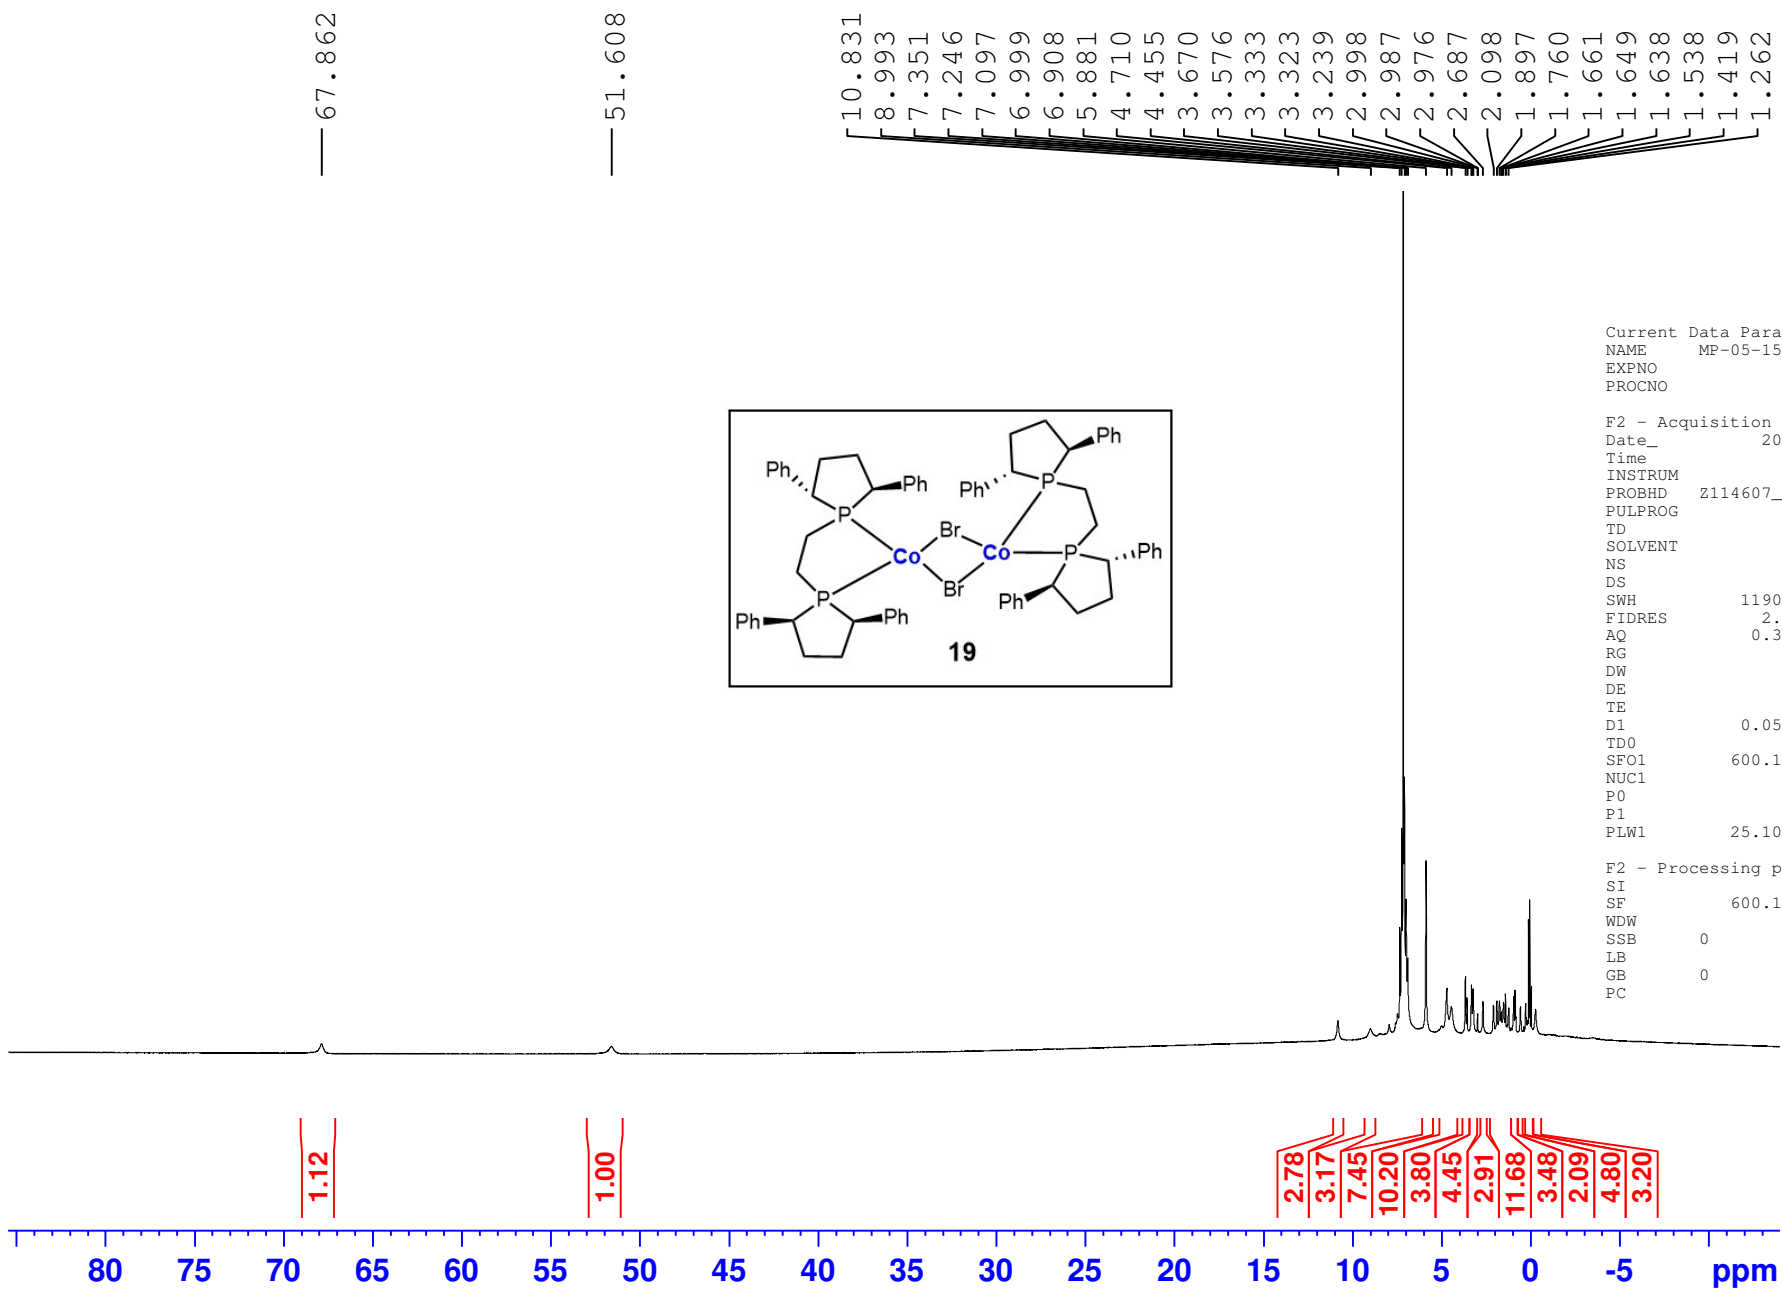

— 67.862

— 51.608

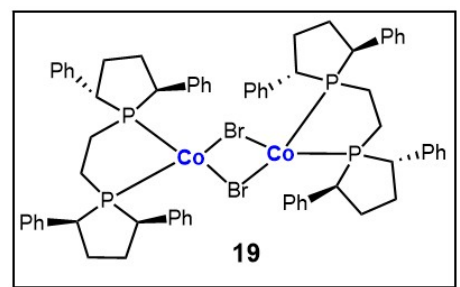

10.831  
8.993  
7.351  
7.246  
7.097  
6.999  
6.908  
5.881  
4.710  
4.455  
3.670  
3.576  
3.333  
3.323  
3.239  
2.998  
2.987  
2.976  
2.687  
2.098  
1.897  
1.760  
1.661  
1.649  
1.638  
1.538  
1.419  
1.262

Current Data Parameters  
 NAME MP-05-156-[ph-bpeCoBr]2  
 EXPNO 4  
 PROCNO 1

F2 - Acquisition Parameters  
 Date\_ 20191121  
 Time 19.49 h  
 INSTRUM spect  
 PROBHD Z114607\_0174 (  
 PULPROG zg30  
 TD 84750  
 SOLVENT C6D6  
 NS 512  
 DS 2  
 SWH 119047.617 Hz  
 FIDRES 2.809383 Hz  
 AQ 0.3559500 sec  
 RG 104.7  
 DW 4.200 usec  
 DE 6.50 usec  
 TE 300.1 K  
 D1 0.05900000 sec  
 TD0 1  
 SFO1 600.1800000 MHz  
 NUC1 1H  
 P0 3.33 usec  
 P1 10.00 usec  
 PLW1 25.10000038 W

F2 - Processing parameters  
 SI 65536  
 SF 600.1799908 MHz  
 WDW EM  
 SSB 0  
 LB 0.30 Hz  
 GB 0  
 PC 1.00



[ipr-duphosCoCl]2-1H-PARA

— 66.305

— 57.236

— 14.097  
9.186  
9.064  
7.158  
2.352  
1.026  
0.900  
0.732  
0.721  
0.591  
-1.039  
-1.535  
-2.687  
-3.962

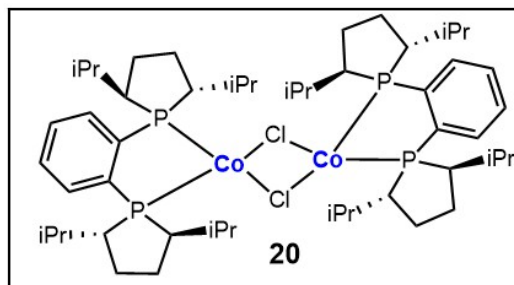

Current Data Parameters  
NAME MP-05-156  
EXPNO 2  
PROCNO 1

F2 - Acquisition Parameters  
Date\_ 20191121  
Time 18.33 h  
INSTRUM spect  
PROBHD Z114607\_0174 (zg30)  
PULPROG zg30  
TD 84750  
SOLVENT C6D6  
NS 512  
DS 2  
SWH 119047.617 Hz  
FIDRES 2.809383 Hz  
AQ 0.3559500 sec  
RG 84.63  
DW 4.200 usec  
DE 6.50 usec  
TE 300.1 K  
D1 0.05900000 sec  
TD0 1  
SFO1 600.1828251 MHz  
NUC1 1H  
P0 3.33 usec  
P1 10.00 usec  
PLW1 25.10000038 W

F2 - Processing parameters  
SI 65536  
SF 600.1799953 MHz  
WDW EM  
SSB 0  
LB 0.30 Hz  
GB 0  
PC 1.00

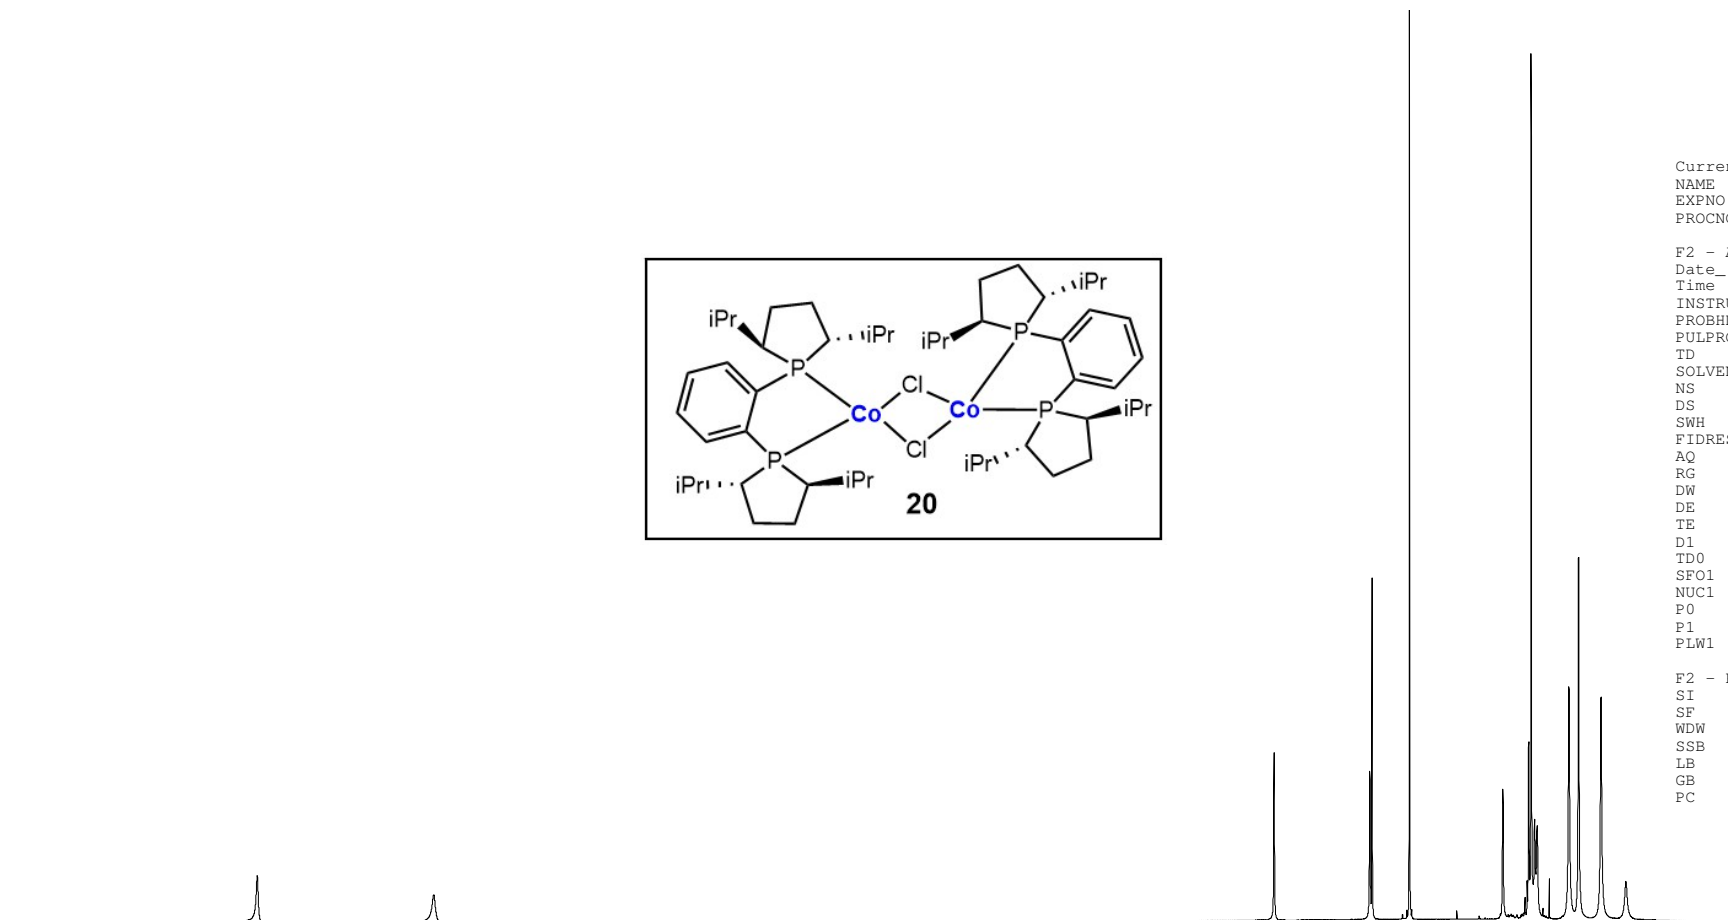

1.42

1.15

2.08

2.09

2.25

2.56

2.21

6.26

1.87

2.13

6.26

6.53

6.28

2.00

75

70

65

60

55

50

45

40

35

30

25

20

15

10

5

0

ppm

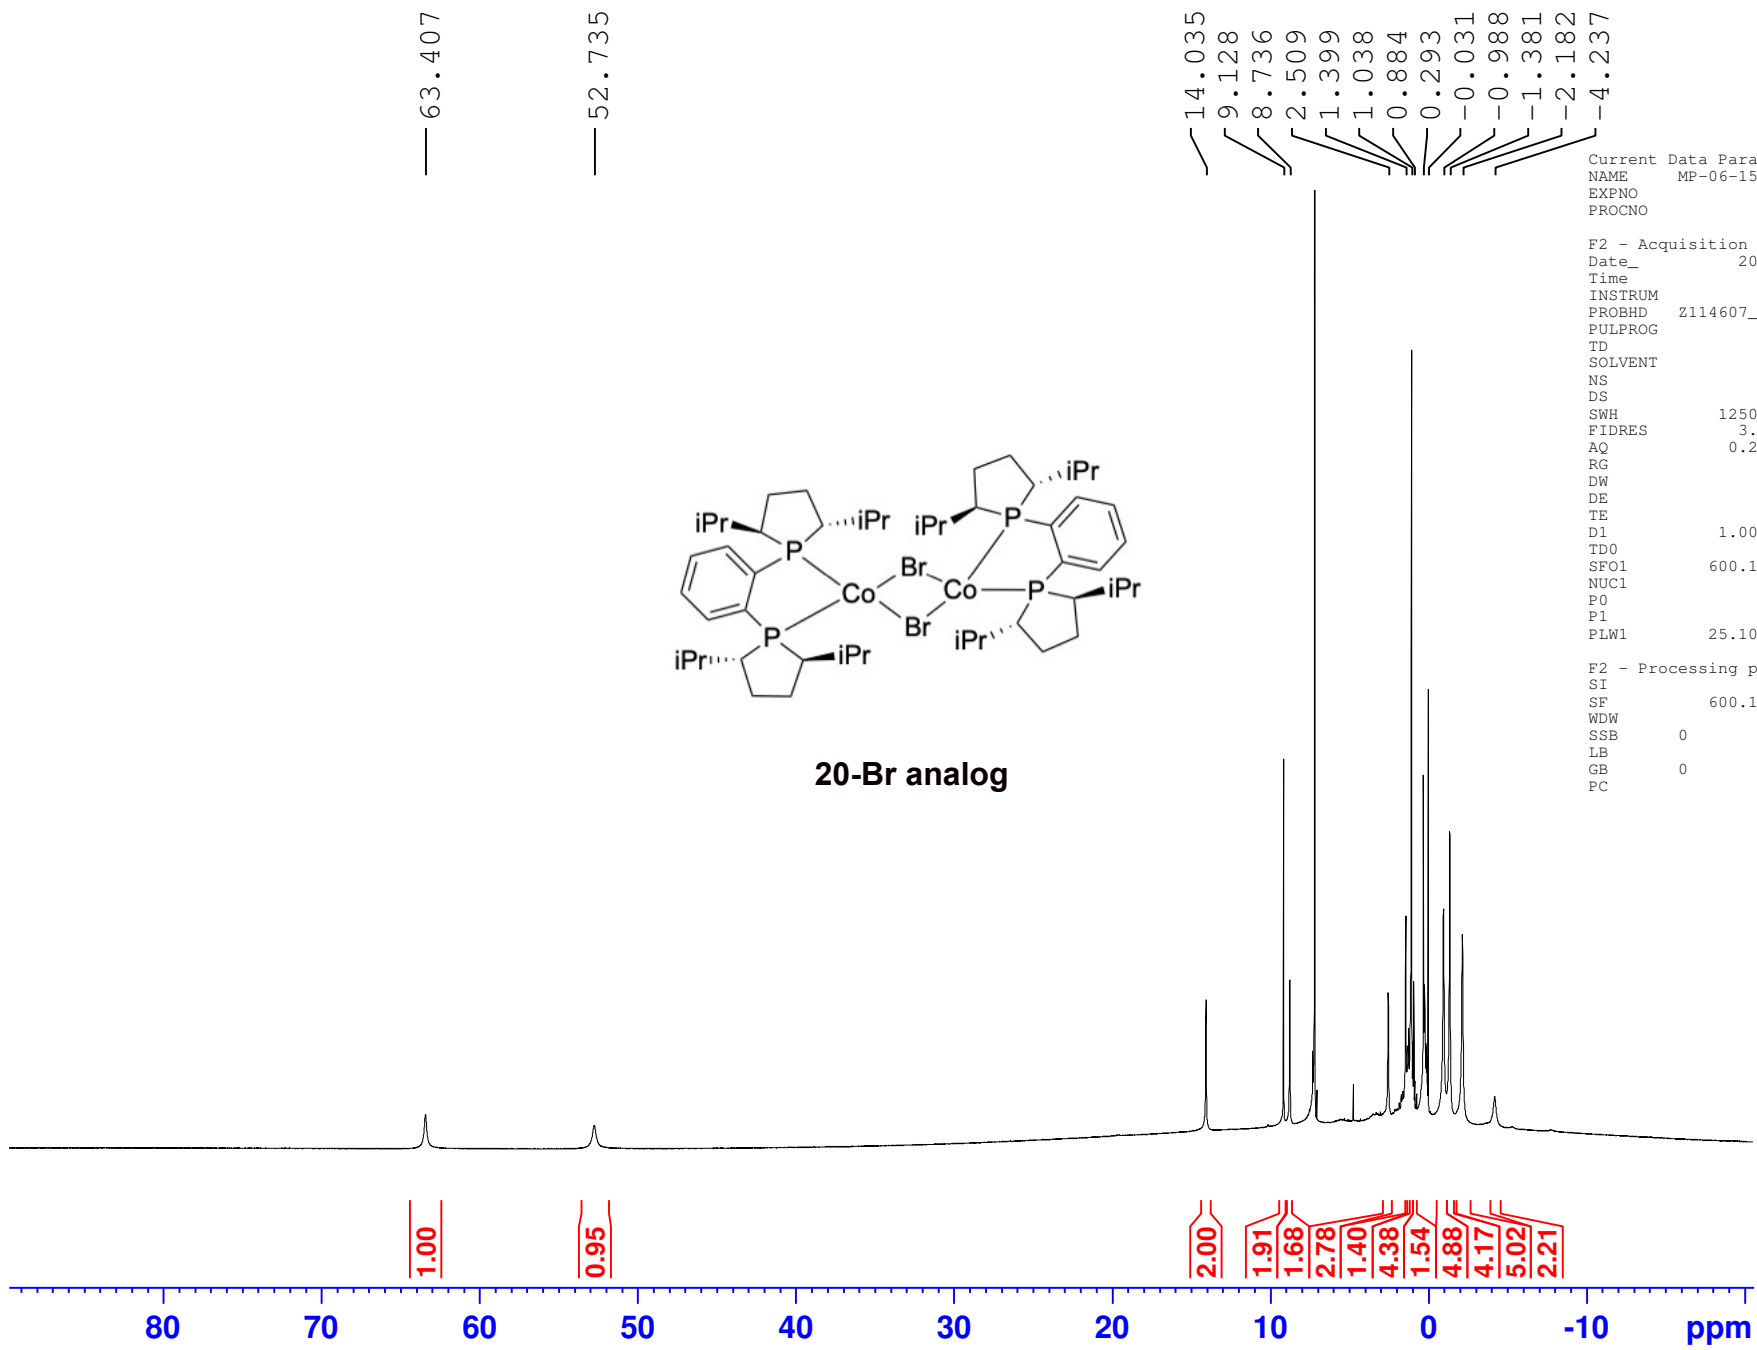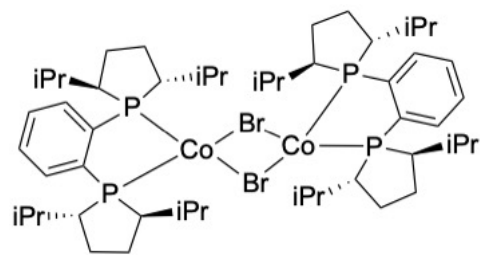

20-Br analog

```

Current Data Parameters
NAME      MP-06-150-IPR-DUPHOSCo (COD)
EXPNO     1
PROCNO    1

F2 - Acquisition Parameters
Date_     20201223
Time      15.23 h
INSTRUM   spect
PROBHD    Z114607_0174 (
PULPROG   zg30
TD         65536
SOLVENT   C6D6
NS         256
DS         2
SWH        125000.000 Hz
FIDRES     3.814697 Hz
AQ         0.2621440 sec
RG         99.15
DW         4.000 usec
DE         7.02 usec
TE         300.2 K
D1         1.00000000 sec
TD0        1
SFO1      600.1837061 MHz
NUC1       1H
P0         3.33 usec
P1         10.00 usec
PLW1       25.10000038 W

F2 - Processing parameters
SI         32768
SF         600.1799960 MHz
WDW        EM
SSB        0
LB         0.30 Hz
GB         0
PC         1.00
  
```

Ipr-PDI-CoCl-1H

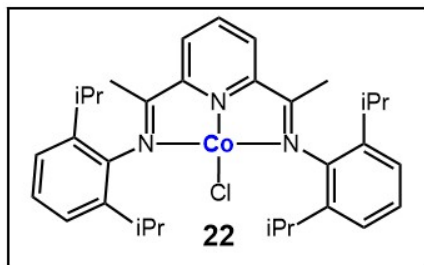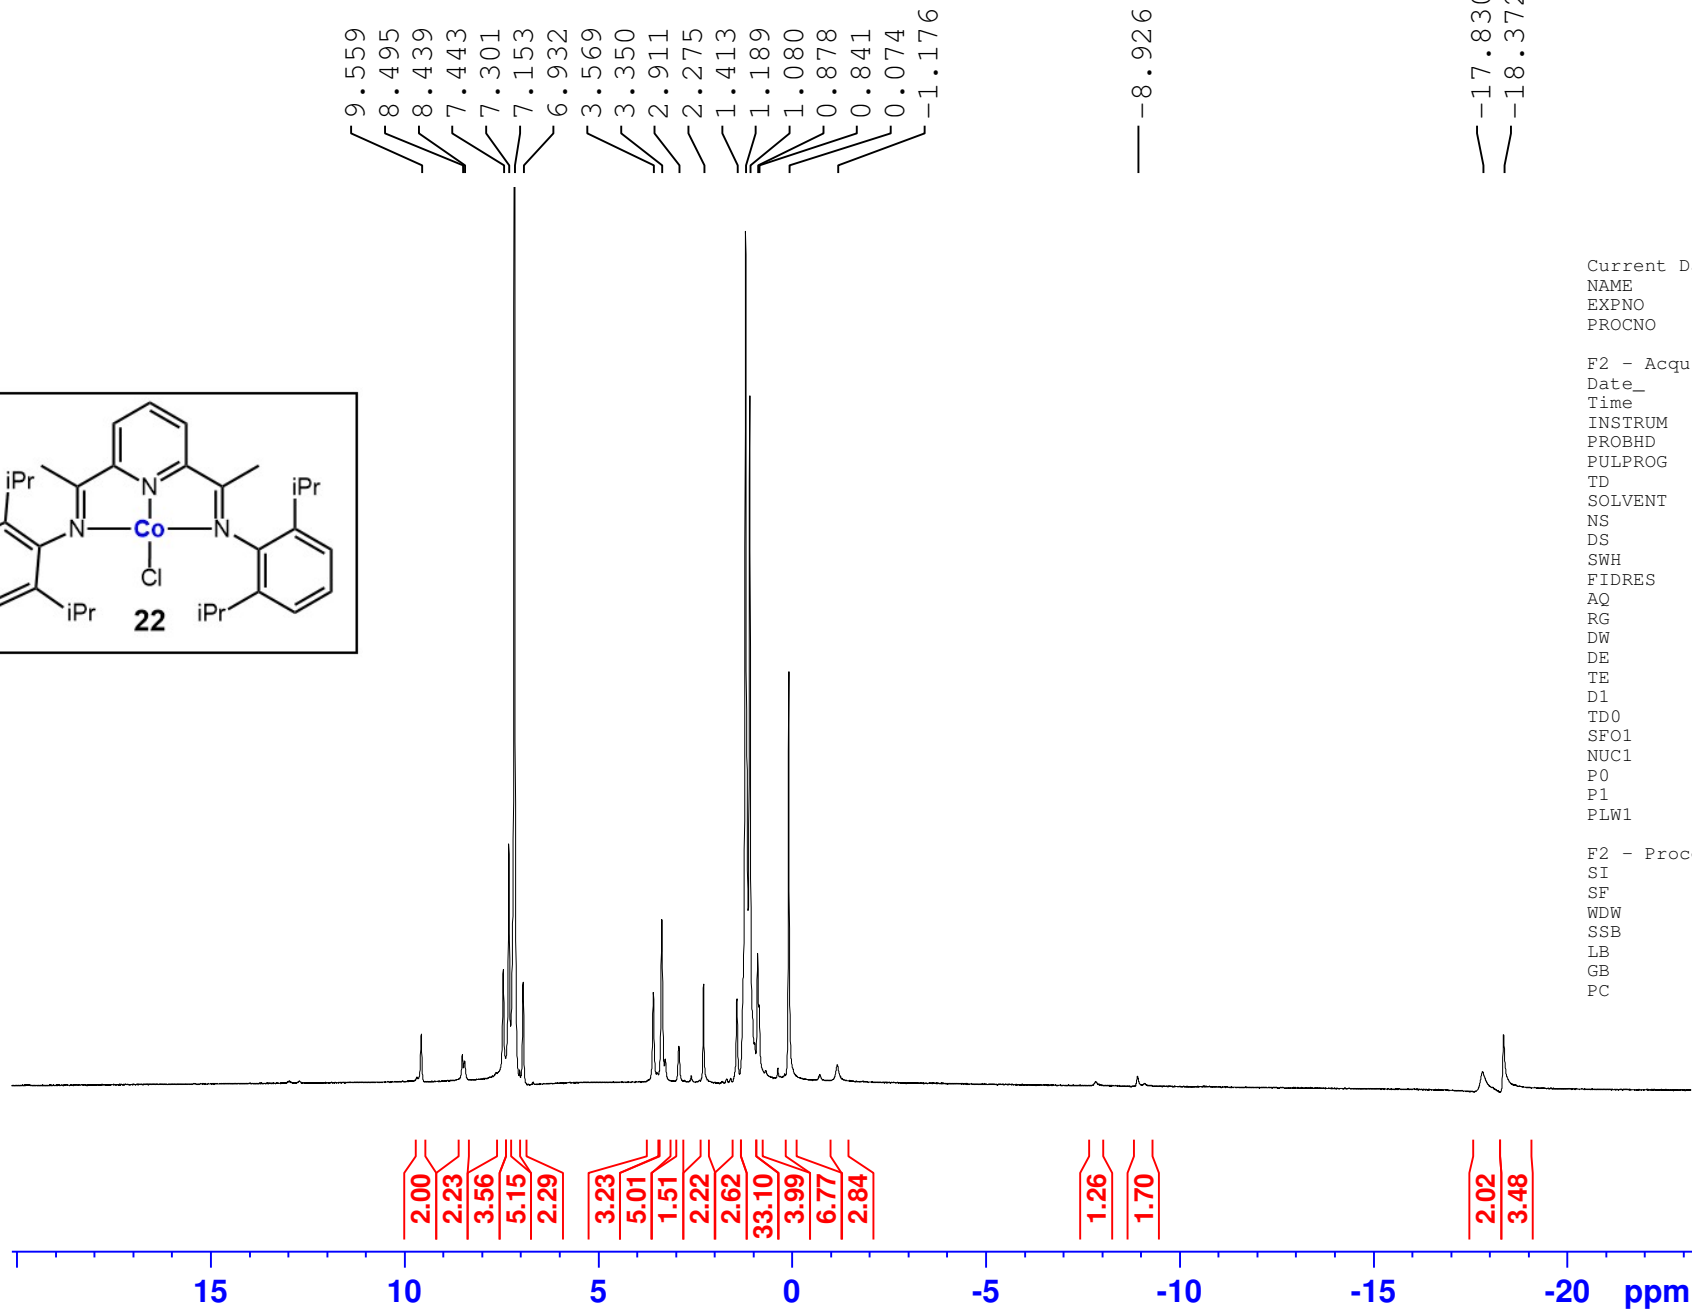

Current Data Parameters  
 NAME MP-05-154  
 EXPNO 5  
 PROCNO 1

F2 - Acquisition Parameters  
 Date\_ 20191120  
 Time 15.34 h  
 INSTRUM spect  
 PROBHD Z114607\_0174 (  
 PULPROG zg30  
 TD 96152  
 SOLVENT C6D6  
 NS 256  
 DS 2  
 SWH 119047.617 Hz  
 FIDRES 2.476238 Hz  
 AQ 0.4038384 sec  
 RG 99.15  
 DW 4.200 usec  
 DE 6.50 usec  
 TE 300.1 K  
 D1 1.00000000 sec  
 TD0 1  
 SFO1 600.1828251 MHz  
 NUC1 1H  
 P0 3.33 usec  
 P1 10.00 usec  
 PLW1 25.10000038 W

F2 - Processing parameters  
 SI 65536  
 SF 600.1799935 MHz  
 WDW EM  
 SSB 0  
 LB 0.30 Hz  
 GB 0  
 PC 1.00

13C

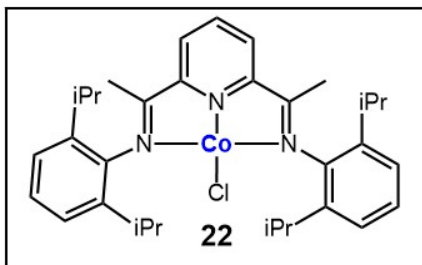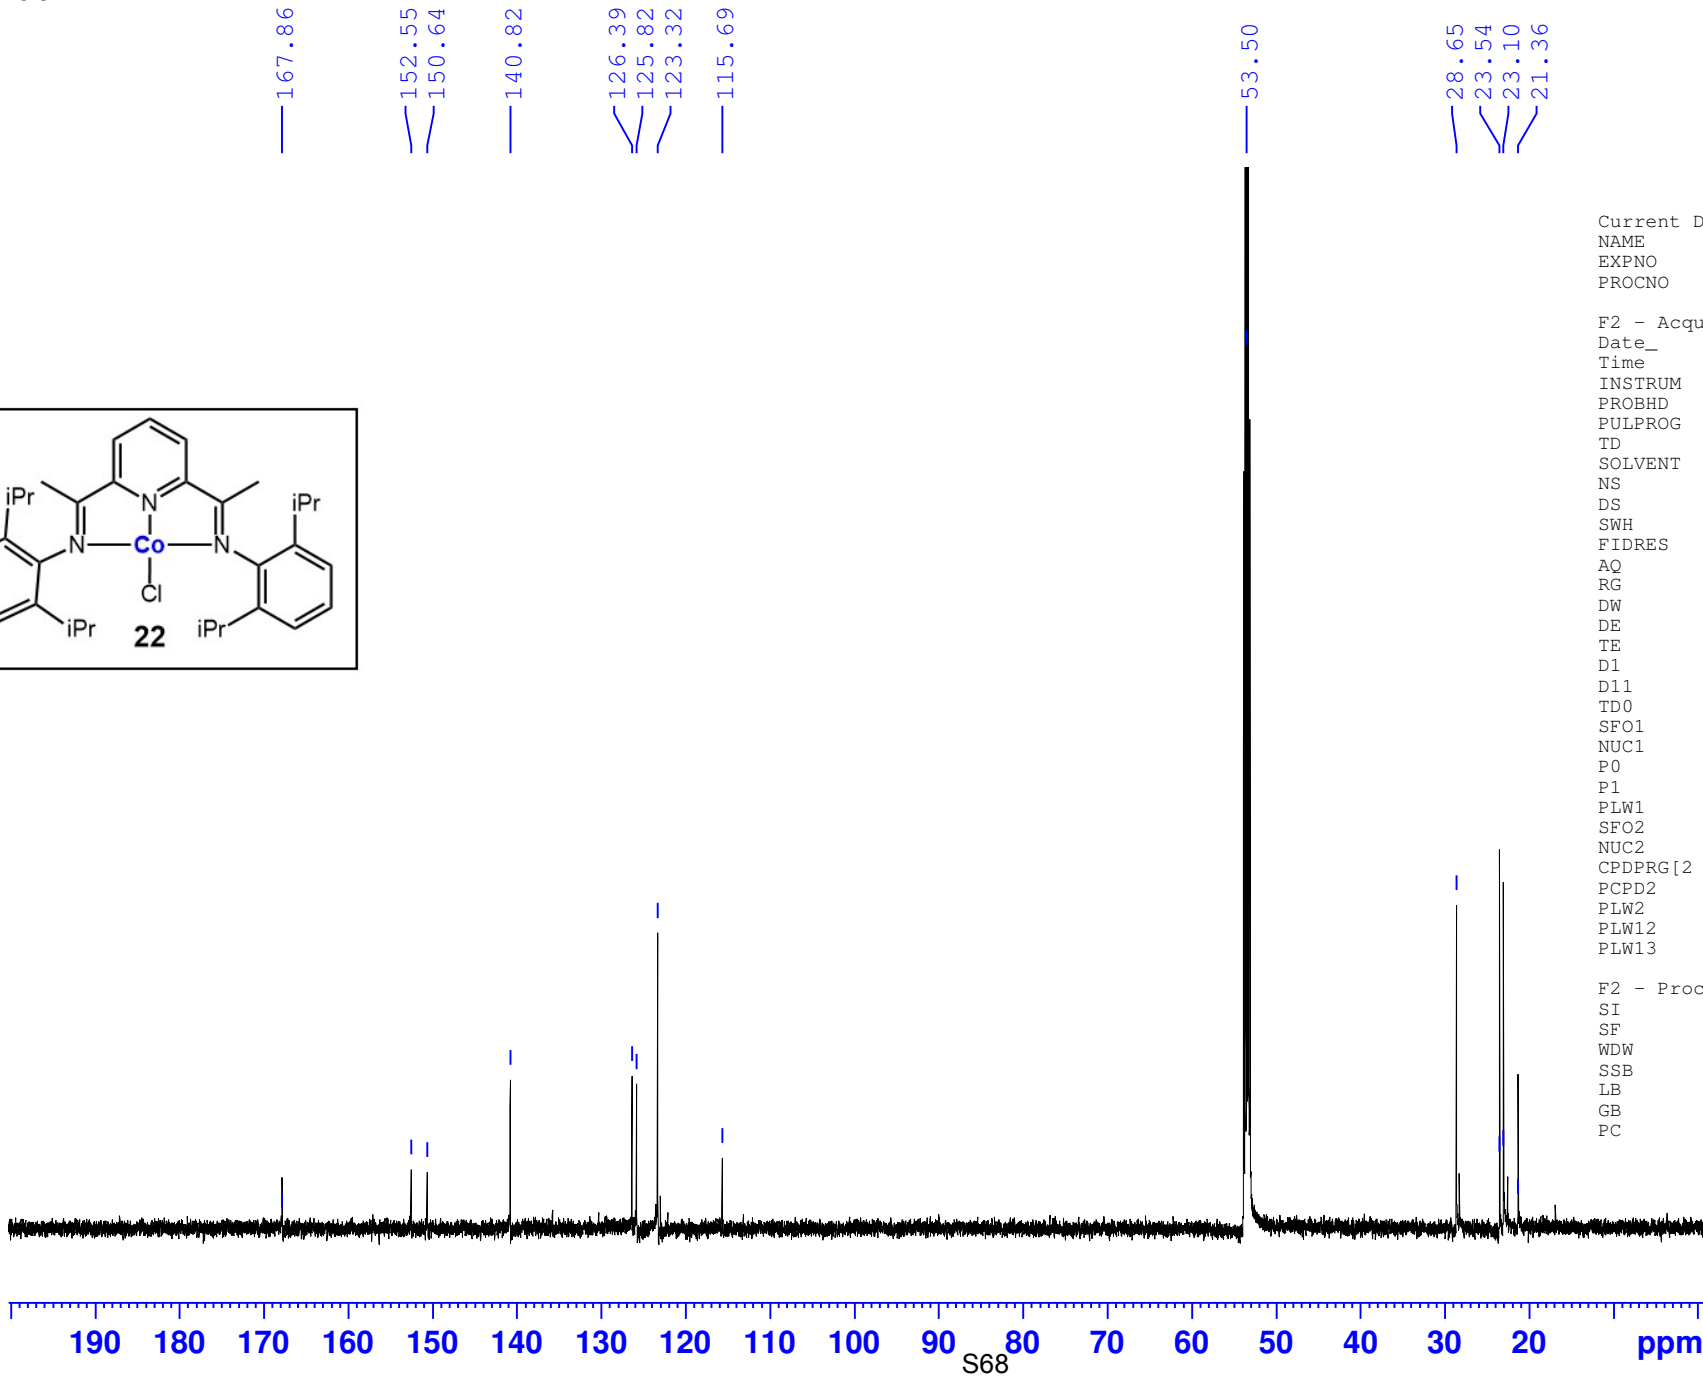

Current Data Parameters  
NAME MP-06-087-IPrPDICOC1  
EXPNO 4  
PROCNO 1

F2 - Acquisition Parameters  
Date\_ 20200916  
Time 18.58 h  
INSTRUM spect  
PROBHD Z114607\_0174 (  
PULPROG zgpg30  
TD 65536  
SOLVENT CD2Cl2  
NS 1024  
DS 4  
SWH 36231.883 Hz  
FIDRES 1.105709 Hz  
AQ 0.9043968 sec  
RG 189.17  
DW 13.800 usec  
DE 6.50 usec  
TE 300.0 K  
D1 2.00000000 sec  
D11 0.03000000 sec  
TD0 1  
SFO1 150.9304726 MHz  
NUC1 13C  
P0 4.00 usec  
P1 12.00 usec  
PLW1 81.53399658 W  
SFO2 600.1824007 MHz  
NUC2 1H  
CPDPRG[2] waltz65  
PCPD2 70.00 usec  
PLW2 28.00000000 W  
PLW12 0.57143003 W  
PLW13 0.28742000 W

F2 - Processing parameters  
SI 32768  
SF 150.9153719 MHz  
WDW EM  
SSB 0  
LB 1.00 Hz  
GB 0  
PC 1.40

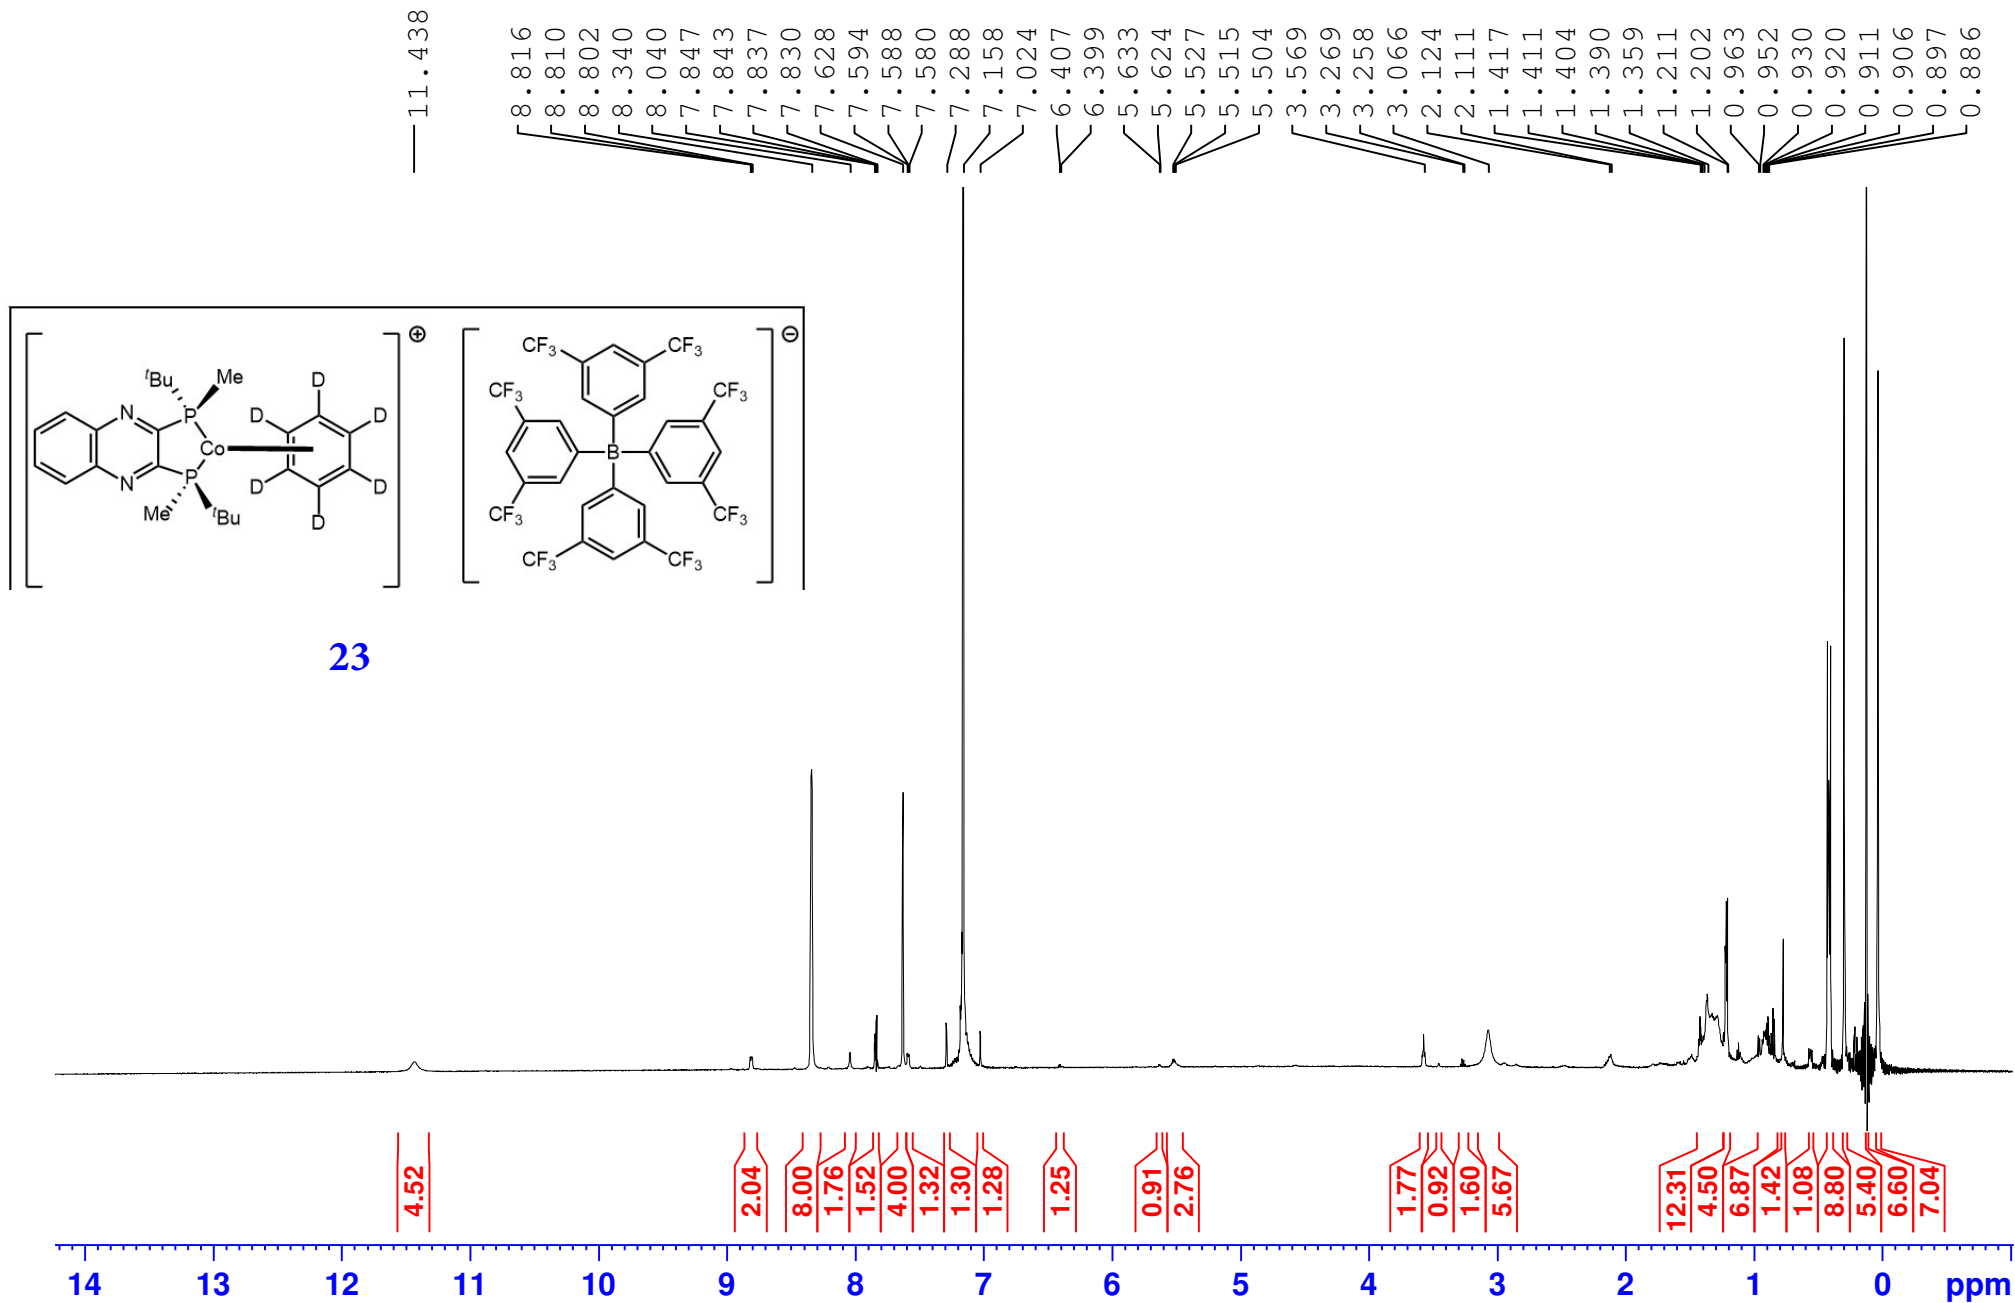

<sup>1</sup>H NMR in CD<sub>2</sub>Cl<sub>2</sub> (600 MHz)

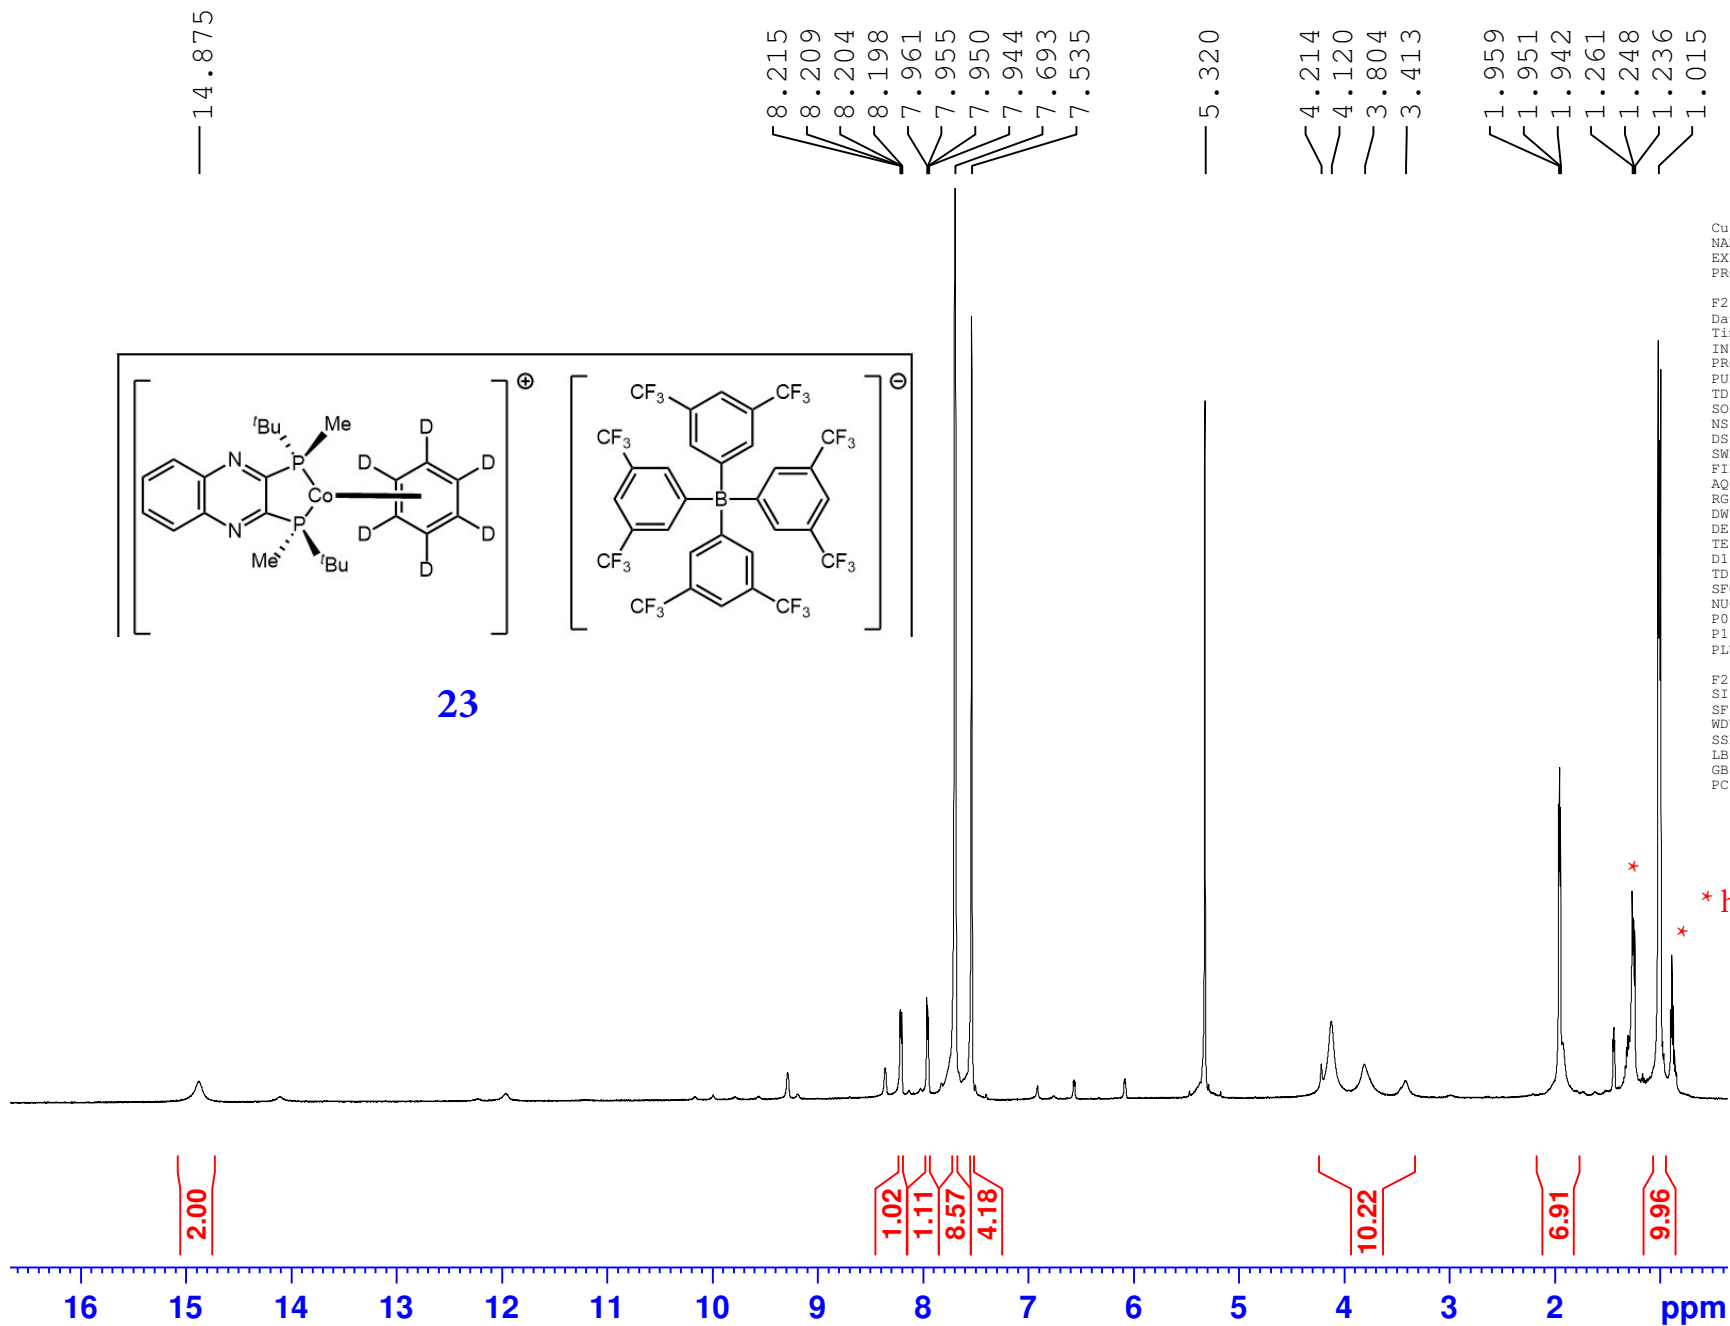

Current Data Parameters  
NAME 6-145-QuinoxCoC6D6ArF  
EXPNO 2  
PROCNO 1

F2 - Acquisition Parameters  
Date\_ 20201219  
Time 19.20 h  
INSTRUM spect  
PROBHD Z114607\_0174 ( )  
PULPROG zg30  
TD 96152  
SOLVENT CD2Cl2  
NS 64  
DS 2  
SWH 18028.846 Hz  
FIDRES 0.375007 Hz  
AQ 2.6666155 sec  
RG 120.04  
DW 27.733 usec  
DE 6.50 usec  
TE 300.2 K  
D1 1.00000000 sec  
TD0 1  
SF01 600.182851 MHz  
NUC1 1H  
PO 3.33 usec  
P1 10.00 usec  
PLW1 25.10000038 W

F2 - Processing parameters  
SI 65536  
SF 600.1800220 MHz  
WDW EM  
SSB 0  
LB 0.30 Hz  
GB 0  
PC 1.00

162.63  
162.30  
161.97  
161.64  
155.29  
135.20  
133.26  
130.40  
129.34  
129.15  
127.70  
125.89  
124.09  
122.29  
117.88  
114.24

37.55  
27.89  
27.24  
12.47

Current Data Parameters  
NAME 6-145-QuinoxCoC6D6BarF  
EXPNO 3  
PROCNO 1

F2 - Acquisition Parameters  
Date\_ 20201219  
Time 21.09 h  
INSTRUM spect  
PROBHD Z114607\_0174 (  
PULPROG zgpg30  
TD 65536  
SOLVENT CD<sub>2</sub>Cl<sub>2</sub>  
NS 2048  
DS 4  
SWH 36057.691 Hz  
FIDRES 1.100393 Hz  
AQ 0.9087659 sec  
RG 189.17  
DW 13.867 usec  
DE 6.50 usec  
TE 300.2 K  
D1 2.0000000 sec  
D11 0.0300000 sec  
TD0 1  
SFO1 150.9304719 MHz  
NUC1 13C  
P0 4.00 usec  
P1 12.00 usec  
PLW1 81.53399658 W  
SFO2 600.1824007 MHz  
NUC2 1H  
PCPD2 70.00 usec  
PLW2 28.00000000 W  
PLW12 0.57143003 W  
PLW13 0.28742000 W

F2 - Processing parameters  
SI 32768  
SF 150.9153143 MHz  
WDW EM  
SSB 0  
LB 1.00 Hz  
GB 0  
PC 1.40

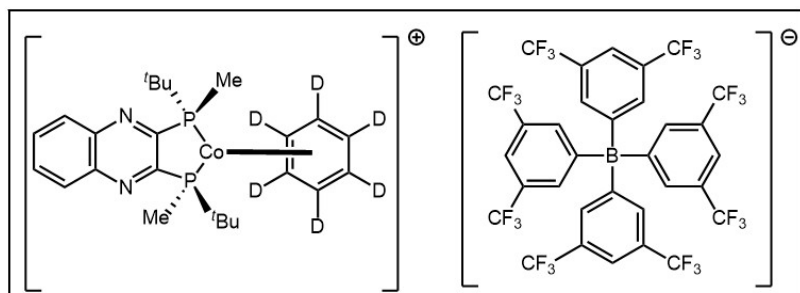

23

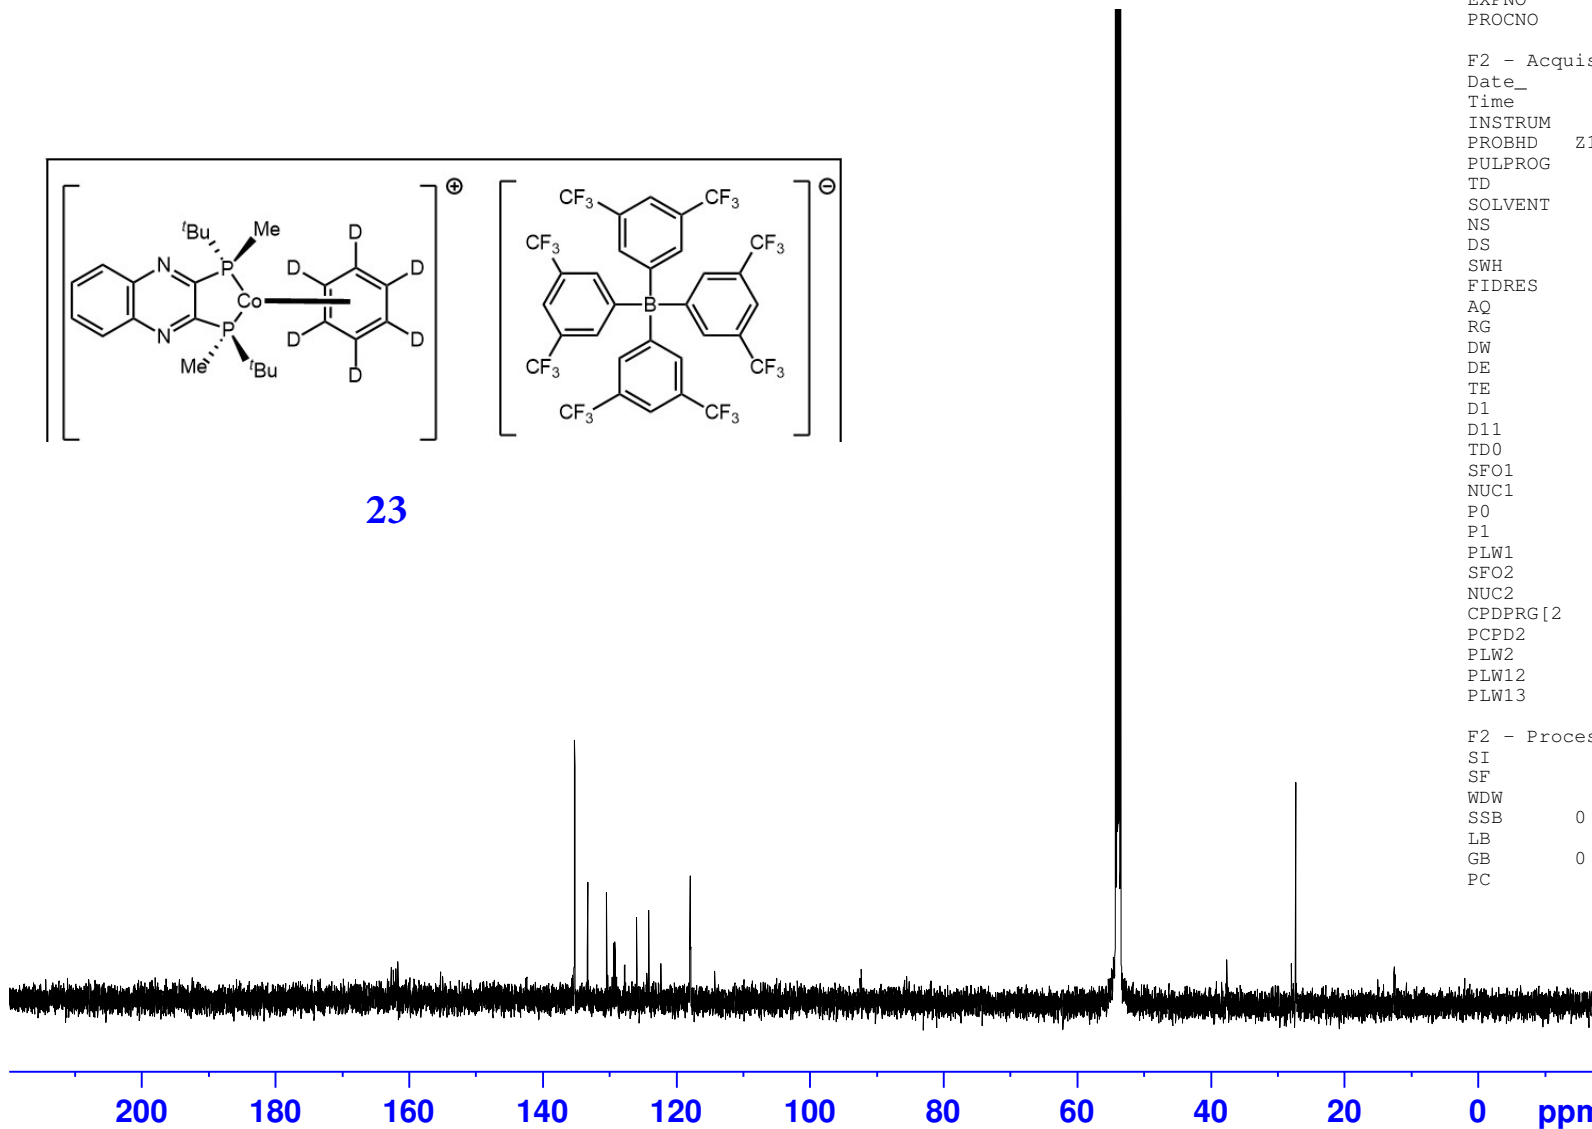

— 58.19

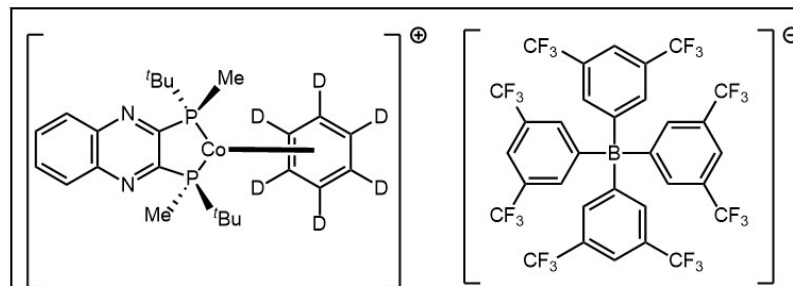

23

Current Data Parameters  
 NAME MP-05-156-QUINOXPco (C6D6) BARF  
 EXPNO 4  
 PROCNO 1

F2 - Acquisition Parameters  
 Date\_ 20200713  
 Time 16.44 h  
 INSTRUM spect  
 PROBHD Z114607\_0174 (  
 PULPROG zg30  
 TD 65536  
 SOLVENT C6D6  
 NS 2048  
 DS 4  
 SWH 96153.844 Hz  
 FIDRES 2.934382 Hz  
 AQ 0.3407872 sec  
 RG 189.17  
 DW 5.200 usec  
 DE 6.50 usec  
 TE 300.1 K  
 D1 2.00000000 sec  
 TD0 1  
 SF01 242.9451695 MHz  
 NUC1 31P  
 P0 4.00 usec  
 P1 12.00 usec  
 PLW1 33.78099823 W

F2 - Processing parameters  
 SI 32768  
 SF 242.9573173 MHz  
 WDW EM  
 SSB 0  
 LB 1.00 Hz  
 GB 0  
 PC 1.40

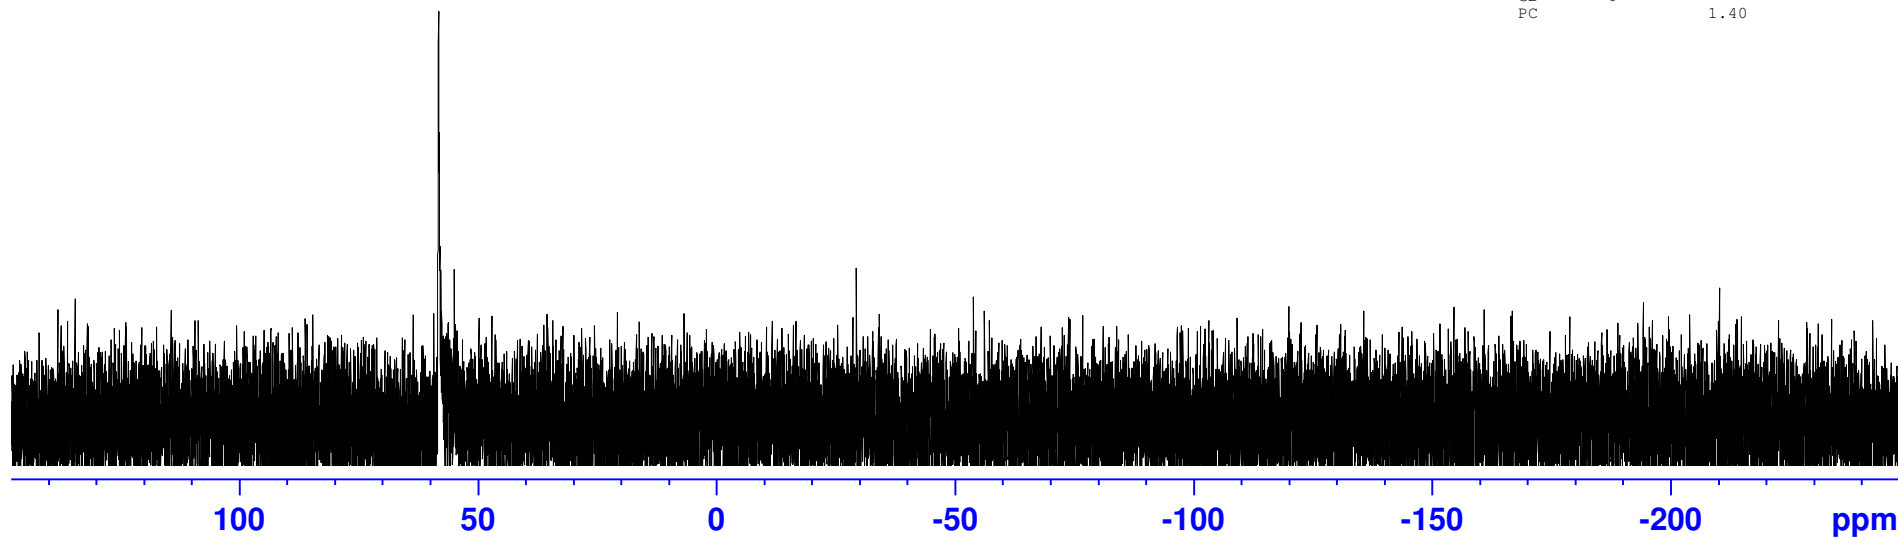



MP-05-156-QUINOXPCo (C6D6) BARF-19F

— -62.05

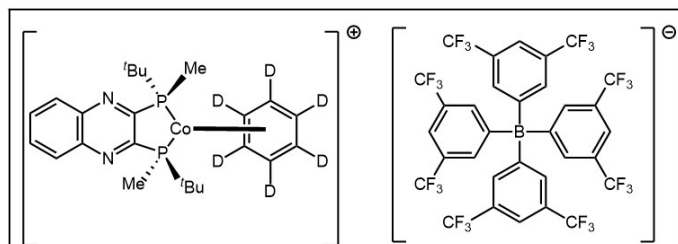

23

Current Data Parameters  
NAME MP-05-156-QUINOXPCo (C6D6) BARF  
EXPNO 5  
PROCNO 1

F2 - Acquisition Parameters  
Date\_ 20200713  
Time 16.54 h  
INSTRUM spect  
PROBHD Z114607\_0174 (  
PULPROG zgflqn  
TD 131072  
SOLVENT C6D6  
NS 128  
DS 4  
SWH 133928.578 Hz  
FIDRES 2.043588 Hz  
AQ 0.4893355 sec  
RG 189.17  
DW 3.733 usec  
DE 6.50 usec  
TE 300.2 K  
D1 1.00000000 sec  
TD0 1  
SFO1 564.6769619 MHz  
NUC1 19F  
P1 12.00 usec  
PLW1 48.93199921 W

F2 - Processing parameters  
SI 65536  
SF 564.7334352 MHz  
WDW EM  
SSB 0  
LB 0.30 Hz  
GB 0  
PC 1.00

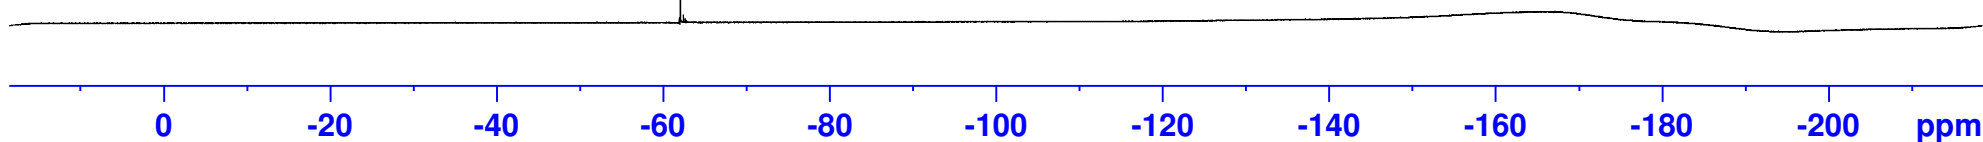

$^{19}\text{F}$  nmr in  $\text{CD}_2\text{Cl}_2$

— -62.79

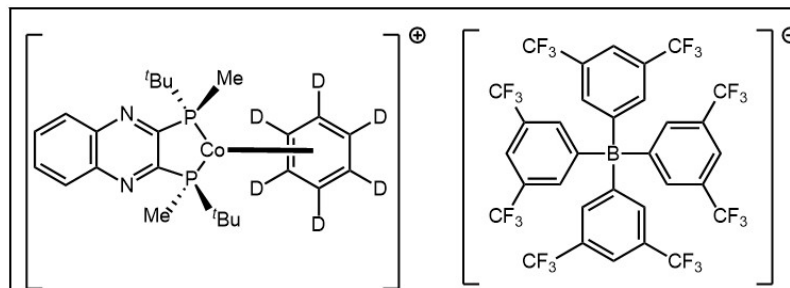

23

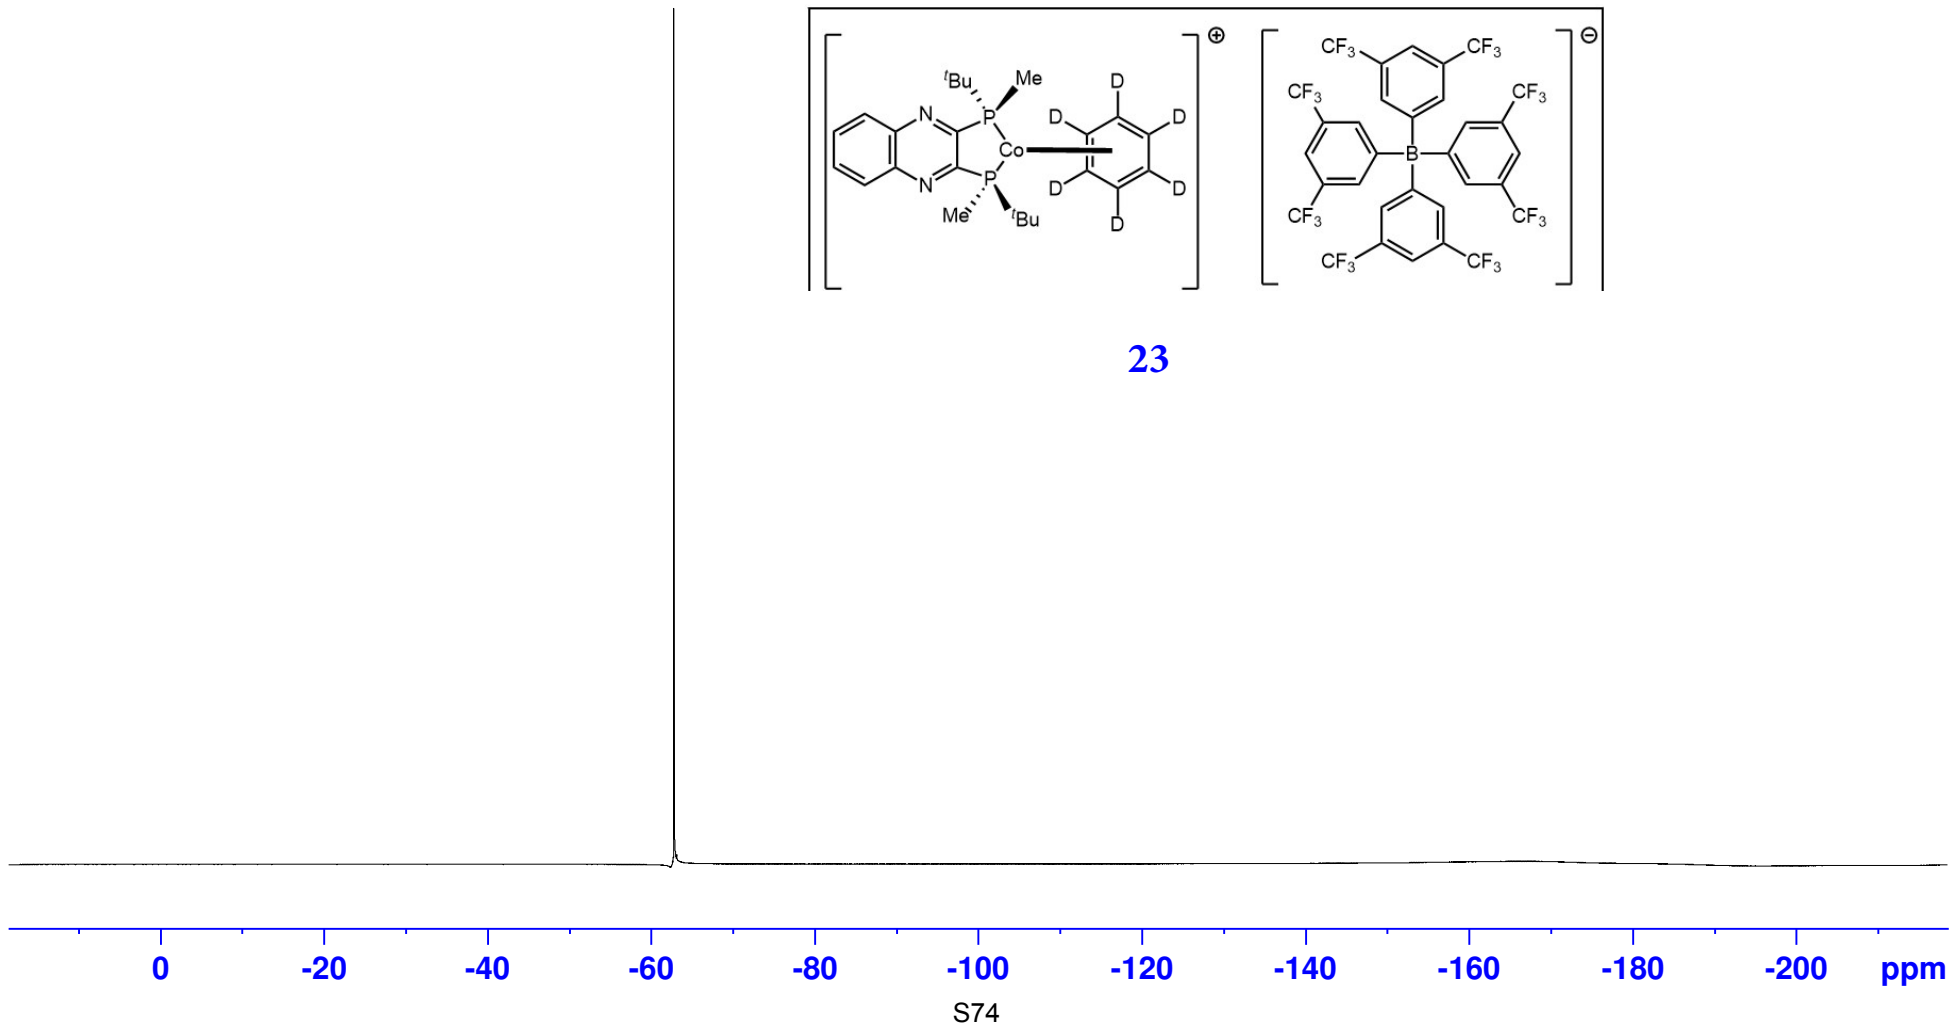

Sample Name: MP-06-049-NONADIENE.D

=====

Acq. Operator : MAHESH  
 Acq. Instrument : Instrument 1 Location : Vial 5  
 Injection Date : 7/22/2020 7:04:03 PM  
 Inj Volume : 1 µl  
 Acq. Method : C:\CHEM32\1\METHODS\MP-80-RAMP.M  
 Last changed : 11/9/2018 7:49:41 PM by mahesh  
 Analysis Method : C:\CHEM32\1\METHODS\MP-80-RAMP.M  
 Last changed : 7/22/2020 8:44:37 PM by Jon  
 (modified after loading)  
 Method Info : General Higher BP that correlates to Stambuli Group's GCMS - 30 min

Additional Info : Peak(s) manually integrated

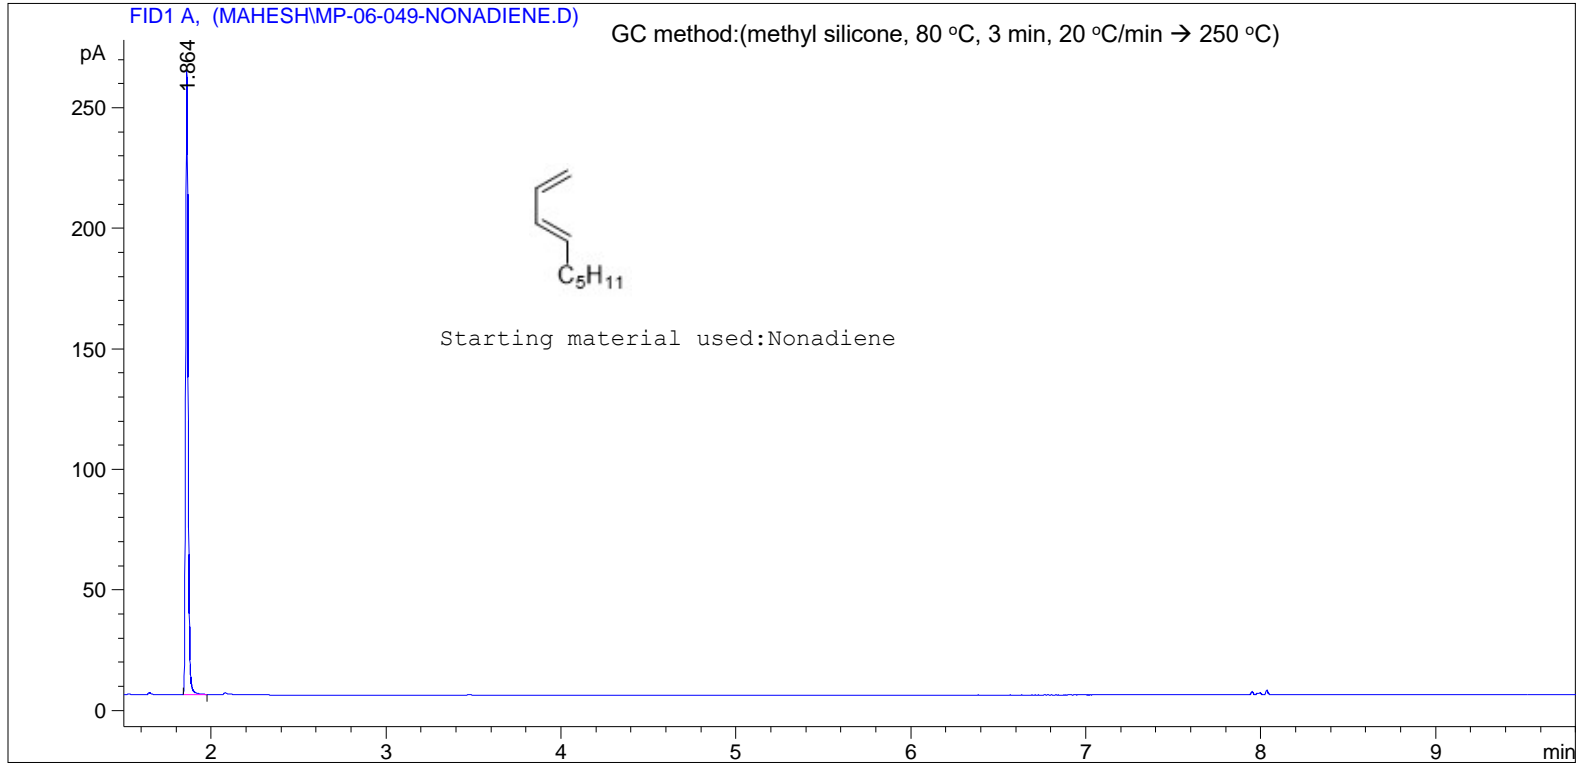

=====

Area Percent Report

=====

Sorted By : Signal  
 Multiplier: : 1.0000  
 Dilution: : 1.0000  
 Use Multiplier & Dilution Factor with ISTDs

Signal 1: FID1 A,

| Peak # | RetTime [min] | Type | Width [min] | Area [pA*s] | Height [pA] | Area %  |
|--------|---------------|------|-------------|-------------|-------------|---------|
| 1      | 1.864         | BB   | 0.0152      | 254.16351   | 258.91553   | 1.000e2 |

=====  
Acq. Operator : MP  
Acq. Instrument : Instrument 1 Location : Vial 4  
Injection Date : 7/22/2020 6:00:29 PM  
Inj Volume : 1 µl  
Acq. Method : C:\CHEM32\1\METHODS\MP-80-RAMP.M  
Last changed : 11/9/2018 7:49:41 PM by mahesh  
Analysis Method : C:\CHEM32\1\METHODS\MP-80-RAMP.M  
Last changed : 7/22/2020 9:08:29 PM by Jon  
(modified after loading)  
Method Info : General Higher BP that correlates to Stambuli Group's GCMS - 30 min

Additional Info : Peak(s) manually integrated

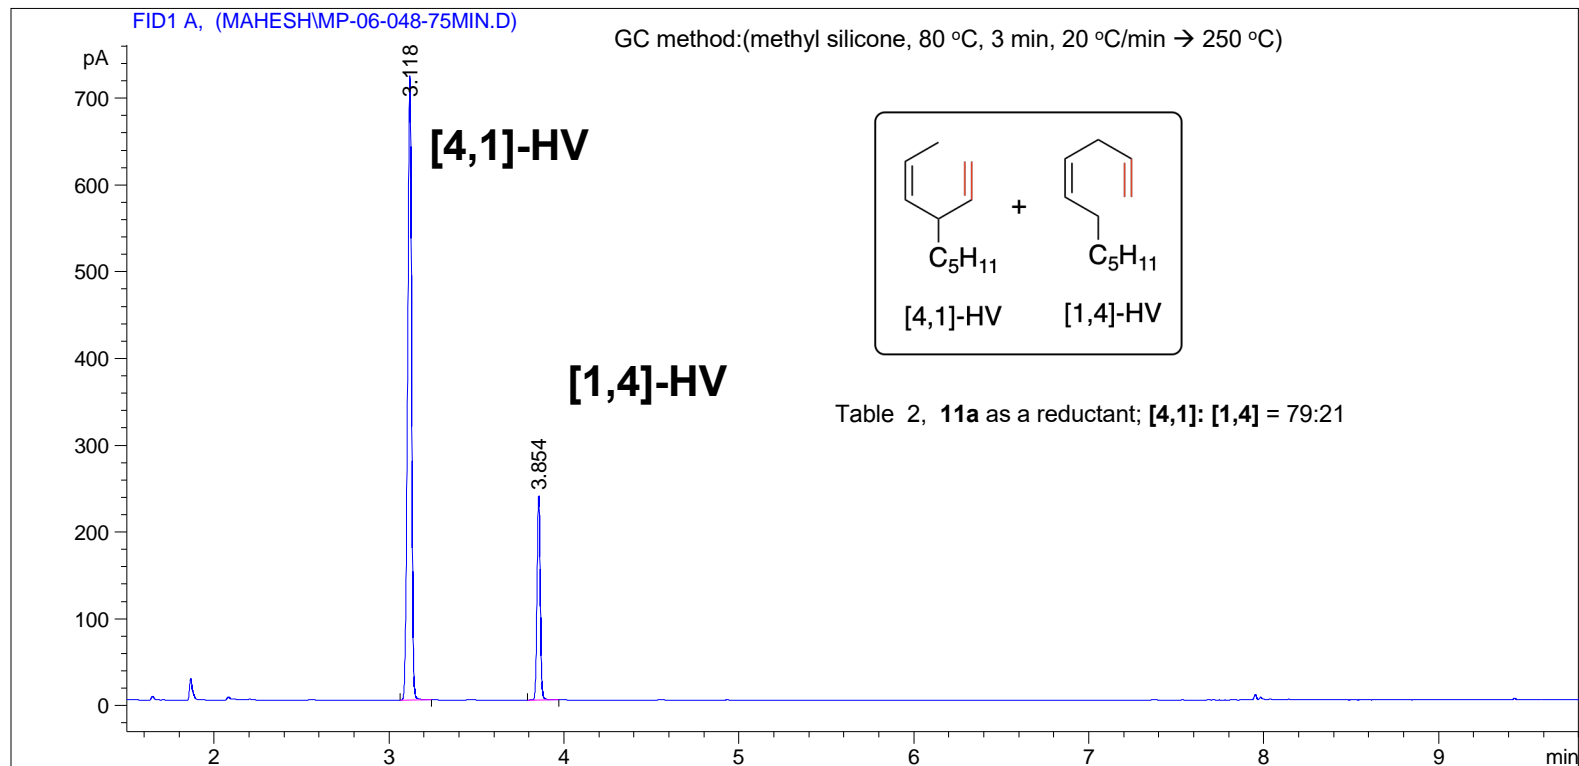

=====  
Area Percent Report  
=====

Sorted By : Signal  
Multiplier: : 1.0000  
Dilution: : 1.0000  
Use Multiplier & Dilution Factor with ISTDs

Signal 1: FID1 A,

| Peak # | RetTime [min] | Type | Width [min] | Area [pA*s] | Height [pA] | Area %   |
|--------|---------------|------|-------------|-------------|-------------|----------|
| 1      | 3.118         | BB   | 0.0241      | 1130.81628  | 719.54199   | 78.91528 |
| 2      | 3.854         | BB   | 0.0202      | 302.13342   | 235.28177   | 21.08472 |

Sample Name: MP-06-049-LI3N-90MIN.D

=====

Acq. Operator : MAHESH  
 Acq. Instrument : Instrument 1 Location : Vial 1  
 Injection Date : 7/22/2020 9:07:24 PM  
 Inj Volume : 1 µl  
 Acq. Method : C:\CHEM32\1\METHODS\MP-80-RAMP.M  
 Last changed : 7/22/2020 9:03:55 PM by MAHESH  
 Analysis Method : C:\CHEM32\1\METHODS\MP-80-RAMP.M  
 Last changed : 7/22/2020 9:19:08 PM by Jon  
 (modified after loading)  
 Method Info : General Higher BP that correlates to Stambuli Group's GCMS - 30 min

Additional Info : Peak(s) manually integrated

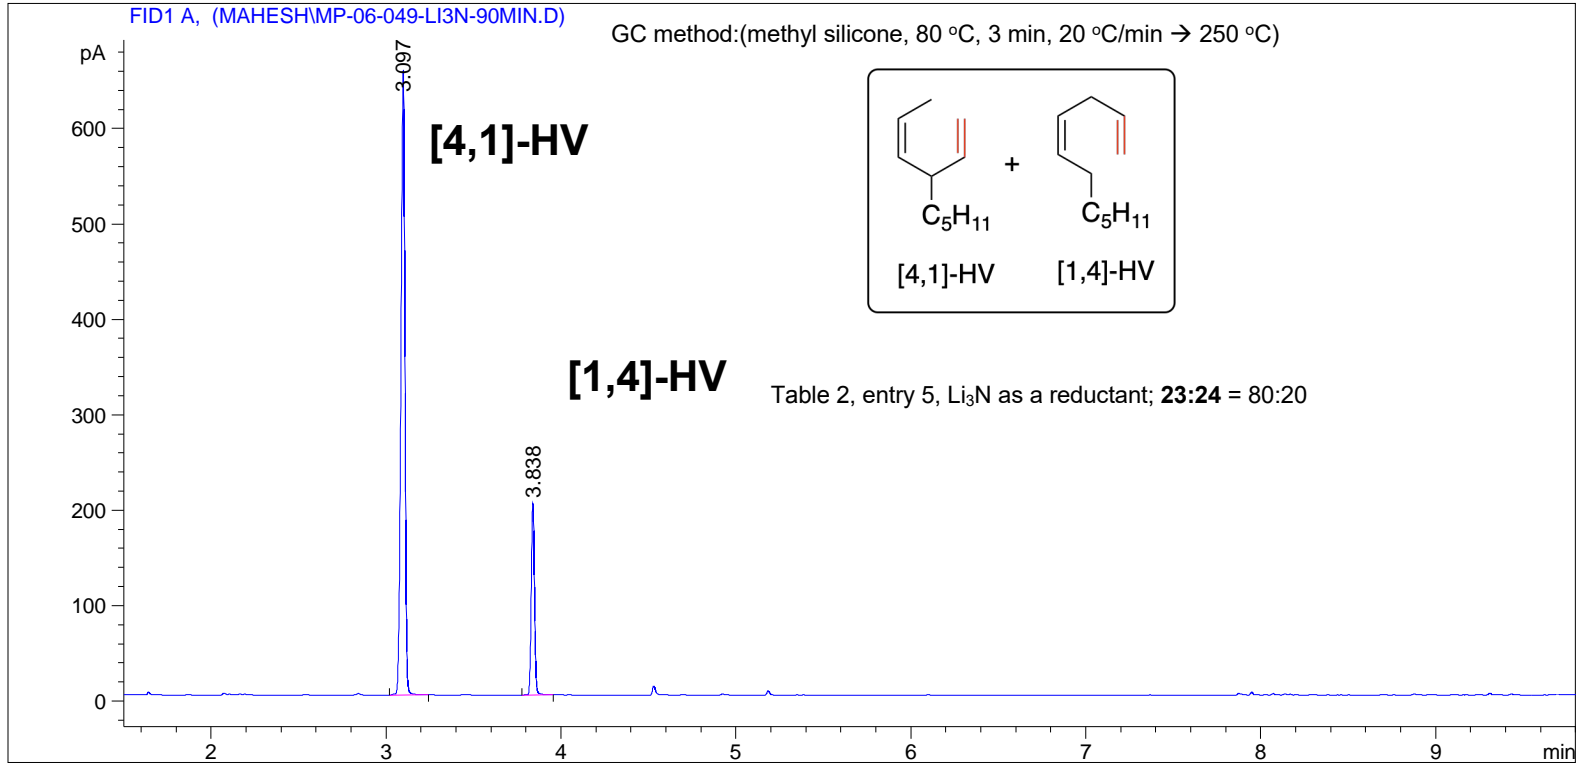

=====

Area Percent Report

Sorted By : Signal  
 Multiplier: : 1.0000  
 Dilution: : 1.0000  
 Use Multiplier & Dilution Factor with ISTDs

Signal 1: FID1 A,

| Peak # | RetTime [min] | Type | Width [min] | Area [pA*s] | Height [pA] | Area %   |
|--------|---------------|------|-------------|-------------|-------------|----------|
| 1      | 3.097         | BB   | 0.0251      | 1043.61243  | 654.43933   | 79.92718 |
| 2      | 3.838         | BB   | 0.0204      | 262.09161   | 201.19478   | 20.07282 |

Sample Name: MP-06-049-11B.D

=====

Acq. Operator : MAHESH  
 Acq. Instrument : Instrument 1 Location : Vial 4  
 Injection Date : 7/22/2020 8:05:15 PM  
 Inj Volume : 1 µl  
 Acq. Method : C:\CHEM32\1\METHODS\MP-80-RAMP.M  
 Last changed : 7/22/2020 7:20:34 PM by MAHESH  
 Analysis Method : C:\CHEM32\1\METHODS\MP-80-RAMP.M  
 Last changed : 7/22/2020 9:08:29 PM by Jon  
 (modified after loading)  
 Method Info : General Higher BP that correlates to Stambuli Group's GCMS - 30 min

Additional Info : Peak(s) manually integrated

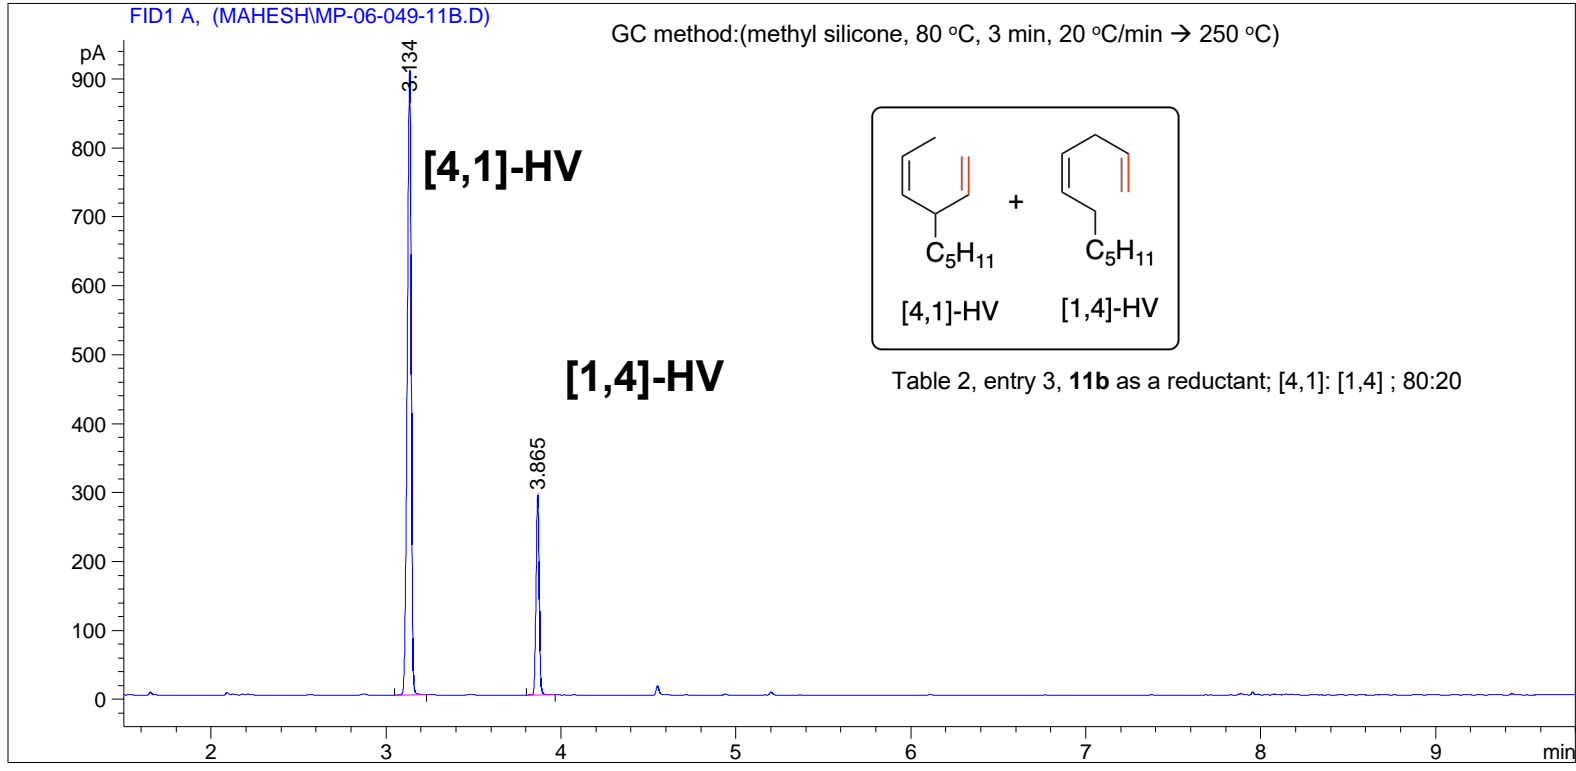

=====

Area Percent Report

=====

Sorted By : Signal  
 Multiplier: : 1.0000  
 Dilution: : 1.0000  
 Use Multiplier & Dilution Factor with ISTDs

Signal 1: FID1 A,

| Peak # | RetTime [min] | Type | Width [min] | Area [pA*s] | Height [pA] | Area %   |
|--------|---------------|------|-------------|-------------|-------------|----------|
| 1      | 3.134         | BB   | 0.0243      | 1422.05847  | 905.30200   | 79.62317 |
| 2      | 3.865         | BB   | 0.0197      | 363.92719   | 289.12943   | 20.37683 |

Sample Name: MP-06-049-.D

=====

Acq. Operator : MP  
 Acq. Instrument : Instrument 1 Location : Vial 5  
 Injection Date : 7/22/2020 3:43:23 PM  
 Inj Volume : 1 µl  
 Acq. Method : C:\CHEM32\1\METHODS\MP-80-RAMP.M  
 Last changed : 11/9/2018 7:49:41 PM by mahesh  
 Analysis Method : C:\CHEM32\1\METHODS\MP-80-RAMP.M  
 Last changed : 7/22/2020 8:40:48 PM by Jon  
 (modified after loading)  
 Method Info : General Higher BP that correlates to Stambuli Group's GCMS - 30 min

Additional Info : Peak(s) manually integrated

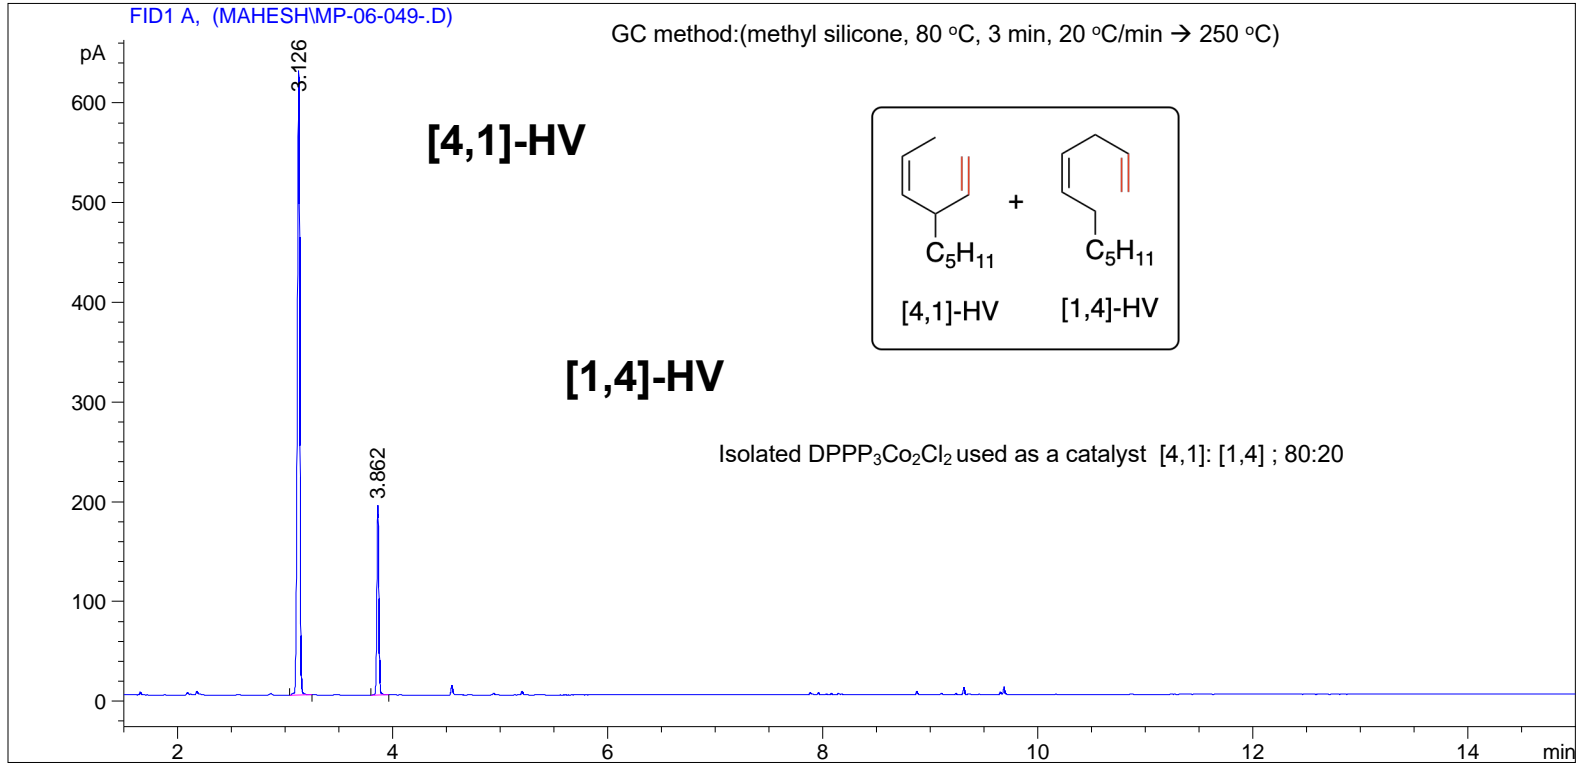

=====

Area Percent Report

Sorted By : Signal  
 Multiplier: : 1.0000  
 Dilution: : 1.0000  
 Use Multiplier & Dilution Factor with ISTDs

Signal 1: FID1 A,

| Peak # | RetTime [min] | Type | Width [min] | Area [pA*s] | Height [pA] | Area %   |
|--------|---------------|------|-------------|-------------|-------------|----------|
| 1      | 3.126         | BB   | 0.0247      | 991.16547   | 626.02551   | 80.08844 |
| 2      | 3.862         | BB   | 0.0203      | 246.42316   | 190.48459   | 19.91156 |

Sample Name: MP-05-082-QUINOXPcobr2-Zn-3H.D

```

=====
Acq. Operator   : MP
Acq. Instrument : Instrument 1                      Location : Vial 2
Injection Date  : 7/30/2019 9:21:08 PM
                                           Inj Volume : 1 µl
Acq. Method     : C:\CHEM32\1\METHODS\MP-80-RAMP.M
Last changed    : 7/30/2019 9:17:48 PM by MP
Analysis Method  : C:\CHEM32\1\METHODS\MP-80-RAMP.M
Last changed    : 7/18/2020 1:24:31 PM by Jon
                  (modified after loading)
Method Info     : General Higher BP that correlates to Stambuli Group's GCMS - 30 min
Sample Info     : dcm-3h-rt

```

Additional Info : Peak(s) manually integrated

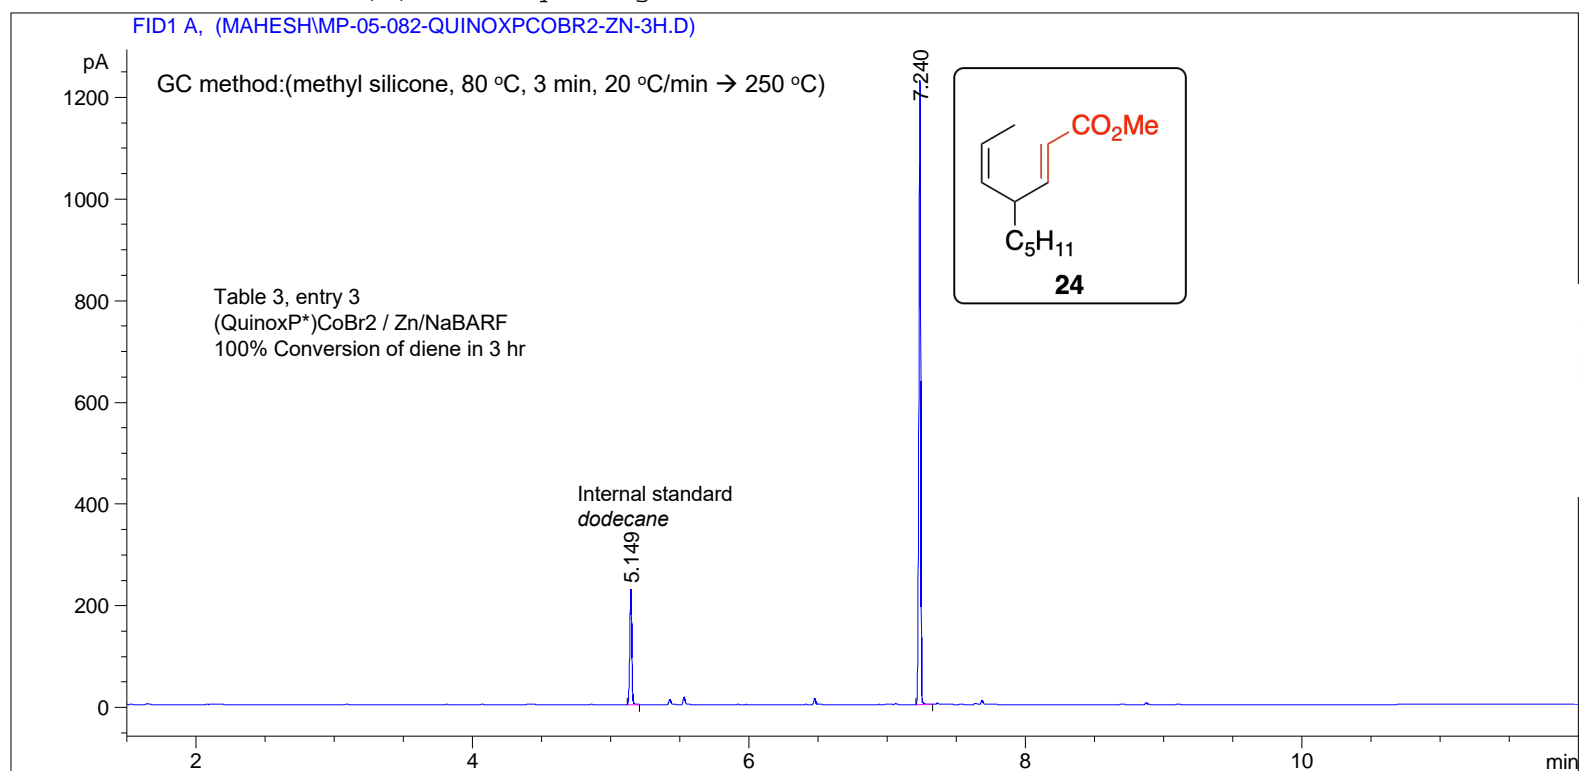

```

=====
                          Area Percent Report
=====

```

```

Sorted By           :      Signal
Multiplier:         :      1.0000
Dilution:           :      1.0000
Sample Amount:      :      1.00000 [ng/ul] (not used in calc.)
Use Multiplier & Dilution Factor with ISTDs

```



Sample Name: MP-05-082-QUINOXPCoBr2-Zn-3H.D

Signal 1: FID1 A,

| Peak # | RetTime [min] | Type | Width [min] | Area [pA*s] | Height [pA] | Area %   |
|--------|---------------|------|-------------|-------------|-------------|----------|
| 1      | 5.149         | BB   | 0.0153      | 224.15259   | 226.86758   | 16.62074 |
| 2      | 7.240         | BB   | 0.0142      | 1124.47925  | 1227.58936  | 83.37926 |

Totals : 1348.63184 1454.45694

=====  
\*\*\* End of Report \*\*\*

Sample Name: MP-05-082-Zn

```

=====
Acq. Operator   : mp                               Seq. Line :    2
Acq. Instrument : Instrument 1                     Location  : Vial 202
Injection Date  : 7/31/2019 1:11:23 PM           Inj       :    1
                                                    Inj Volume: 1 µl

Acq. Method     : C:\CHEM32.NEW\1\DATA\MAHESH\MAHESH_CHIRAL_GC 2019-07-31 11-47-17\MP-125-ISO-
                  CHIRAL-CYCLOSIL.M
Last changed    : 7/31/2019 12:41:21 PM by mp
                  (modified after loading)
Analysis Method : C:\CHEM32.NEW\1\METHODS\LI-90-ISO300-RAMP5-CYCLOSIL.M
Last changed    : 7/18/2020 2:10:01 PM by MP
                  (modified after loading)
Additional Info  : Peak(s) manually integrated
    
```

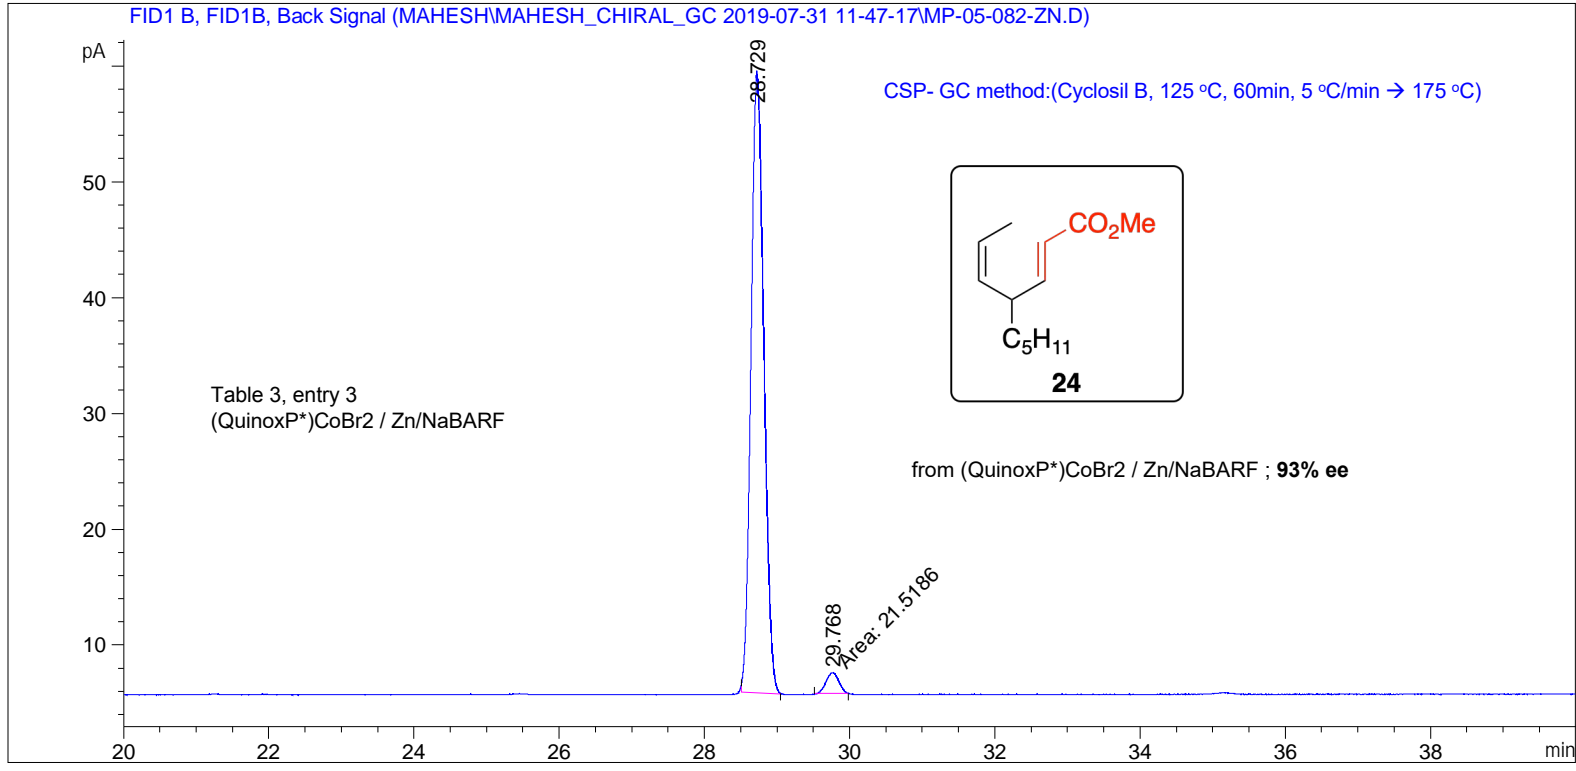

Area Percent Report

```

Sorted By      :      Signal
Multiplier:    :      1.0000
Dilution:      :      1.0000
Use Multiplier & Dilution Factor with ISTDs
    
```

Signal 1: FID1 B, FID1B, Back Signal

| Peak # | RetTime [min] | Type | Width [min] | Area [pA*s] | Height [pA] | Area %   |
|--------|---------------|------|-------------|-------------|-------------|----------|
| 1      | 28.729        | BB   | 0.1487      | 657.81714   | 53.63758    | 96.83241 |
| 2      | 29.768        | MM   | 0.2003      | 21.51856    | 1.79078     | 3.16759  |

Sample Name: MP-05-082-QUINOXPCOBR2-BTDHPY-3H.D

```

=====
Acq. Operator   : MP
Acq. Instrument : Instrument 1                      Location : Vial 3
Injection Date  : 7/30/2019 9:37:37 PM
                                           Inj Volume : 1 µl
Acq. Method     : C:\CHEM32\1\METHODS\MP-80-RAMP.M
Last changed    : 7/30/2019 9:34:13 PM by MP
Analysis Method  : C:\CHEM32\1\METHODS\MP-80-RAMP.M
Last changed    : 7/18/2020 1:26:37 PM by Jon
                  (modified after loading)
Method Info     : General Higher BP that correlates to Stambuli Group's GCMS - 30 min
Sample Info     : dcm-3h-rt
  
```

Additional Info : Peak(s) manually integrated

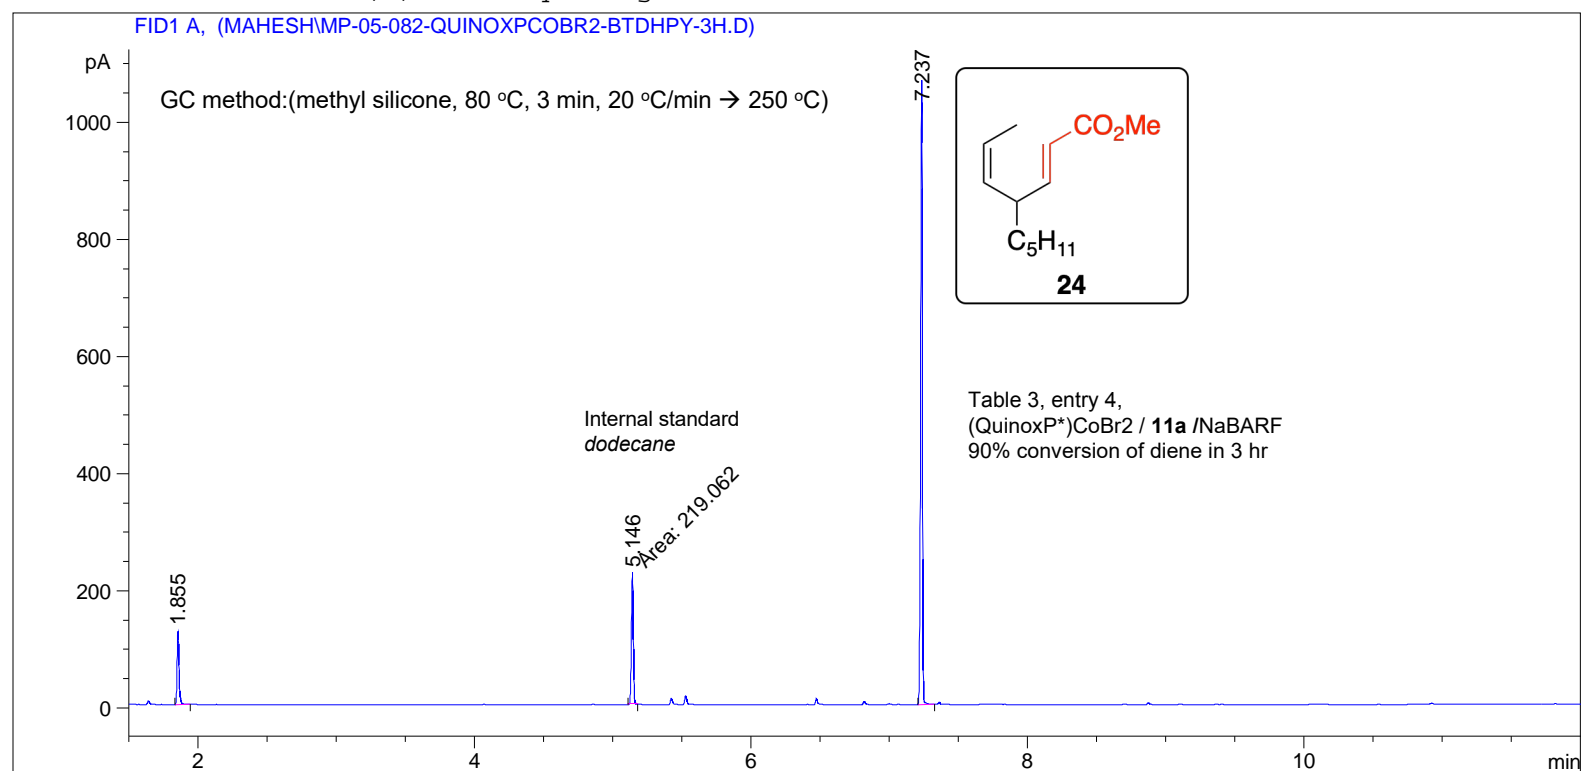

```

=====
                          Area Percent Report
=====
  
```

```

Sorted By      :      Signal
Multiplier:    :      1.0000
Dilution:      :      1.0000
Sample Amount: :      1.00000 [ng/ul] (not used in calc.)
Use Multiplier & Dilution Factor with ISTDs
  
```

Sample Name: MP-05-082-QUINOXPCOBR2-BTDHPY-3H.D

Signal 1: FID1 A,

| Peak # | RetTime [min] | Type | Width [min] | Area [pA*s] | Height [pA] | Area %   |
|--------|---------------|------|-------------|-------------|-------------|----------|
| 1      | 1.855         | BB   | 0.0152      | 123.01768   | 125.06725   | 9.34019  |
| 2      | 5.146         | MM   | 0.0163      | 219.06192   | 224.35565   | 16.63241 |
| 3      | 7.237         | BB   | 0.0139      | 974.99933   | 1066.07556  | 74.02740 |

Totals : 1317.07893 1415.49846

=====  
\*\*\* End of Report \*\*\*



Sample Name: MP-05-082-QUINOXPcobr-dimer-3H

```

=====
Acq. Operator   : MP
Acq. Instrument : Instrument 1                      Location : Vial 1
Injection Date  : 7/30/2019 9:05:14 PM
                                           Inj Volume : 1 µl
Acq. Method     : C:\CHEM32\1\METHODS\MP-80-RAMP.M
Last changed    : 11/9/2018 7:49:41 PM by mahesh
Analysis Method : C:\CHEM32\1\METHODS\MP-80-RAMP.M
Last changed    : 7/18/2020 1:26:37 PM by Jon
                 (modified after loading)
Method Info     : General Higher BP that correlates to Stambuli Group's GCMS - 30 min
Sample Info     : dcm-3h-rt
  
```

Additional Info : Peak(s) manually integrated

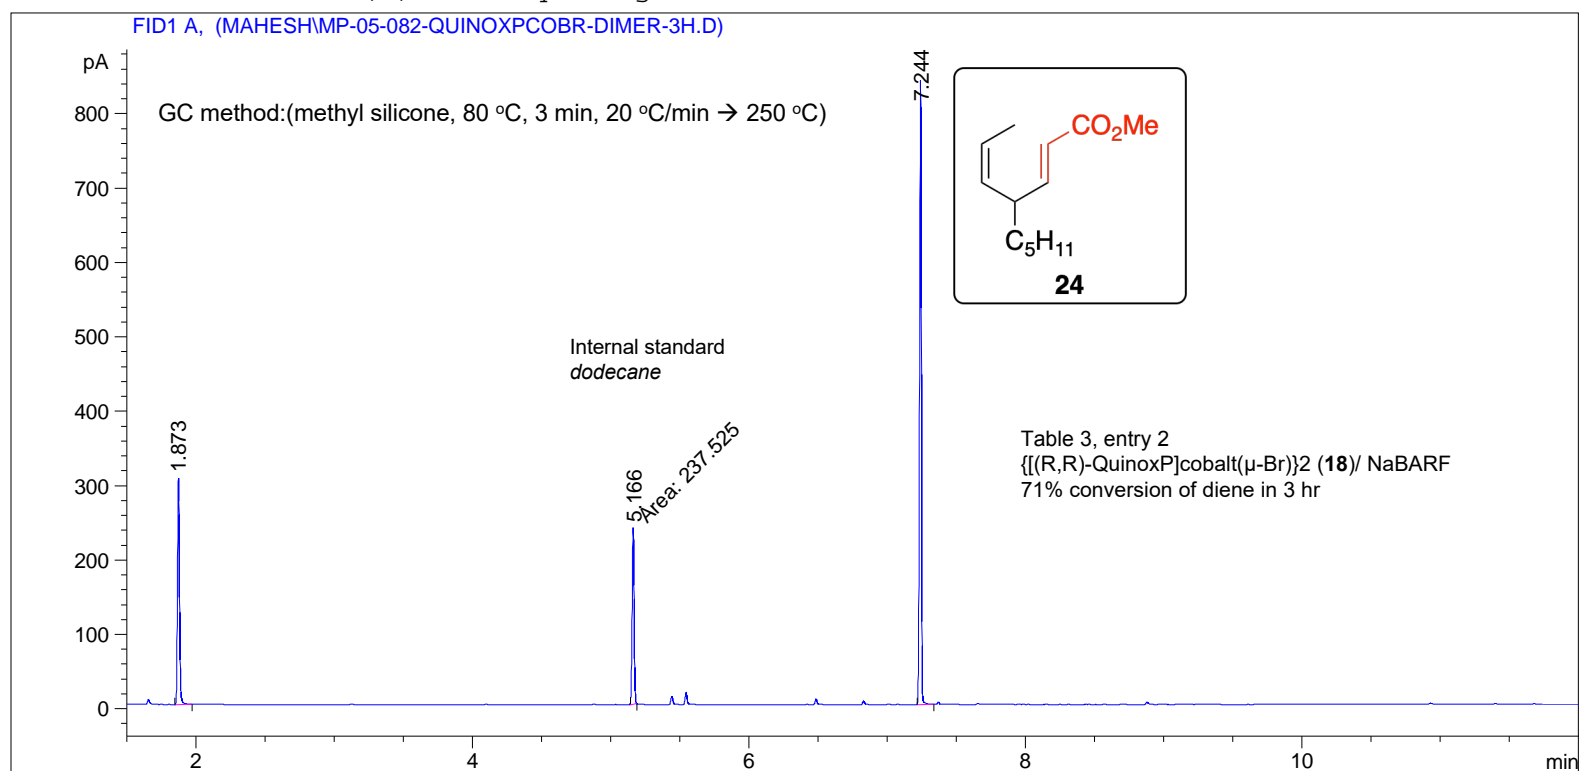

```

=====
                          Area Percent Report
=====
  
```

```

Sorted By      :      Signal
Multiplier:    :      1.0000
Dilution:      :      1.0000
Sample Amount: :      1.00000 [ng/ul] (not used in calc.)
Use Multiplier & Dilution Factor with ISTDs
  
```

Sample Name: MP-05-082-QUINOXPCoBr-dimer-3H

Signal 1: FID1 A,

| Peak # | RetTime [min] | Type | Width [min] | Area [pA*s] | Height [pA] | Area %   |
|--------|---------------|------|-------------|-------------|-------------|----------|
| 1      | 1.873         | BB   | 0.0161      | 308.49216   | 304.28009   | 23.78464 |
| 2      | 5.166         | MM   | 0.0167      | 237.52470   | 237.38588   | 18.31308 |
| 3      | 7.244         | BB   | 0.0139      | 751.00549   | 839.08966   | 57.90228 |

Totals : 1297.02235 1380.75563

=====  
\*\*\* End of Report \*\*\*

=====  
Acq. Operator : mp Seq. Line : 1  
Acq. Instrument : Instrument 1 Location : Vial 201  
Injection Date : 7/31/2019 11:48:56 AM Inj : 1  
Inj Volume : 1 µl  
Acq. Method : C:\CHEM32.NEW\1\DATA\MAHESH\MAHESH\_CHIRAL\_GC 2019-07-31 11-47-17\MP-125-ISO-  
CHIRAL-CYCLOSIL.M  
Last changed : 7/31/2019 12:41:21 PM by mp  
(modified after loading)  
Analysis Method : C:\CHEM32.NEW\1\METHODS\LI-90-ISO300-RAMP5-CYCLOSIL.M  
Last changed : 7/18/2020 2:07:49 PM by MP  
(modified after loading)  
Additional Info : Peak(s) manually integrated

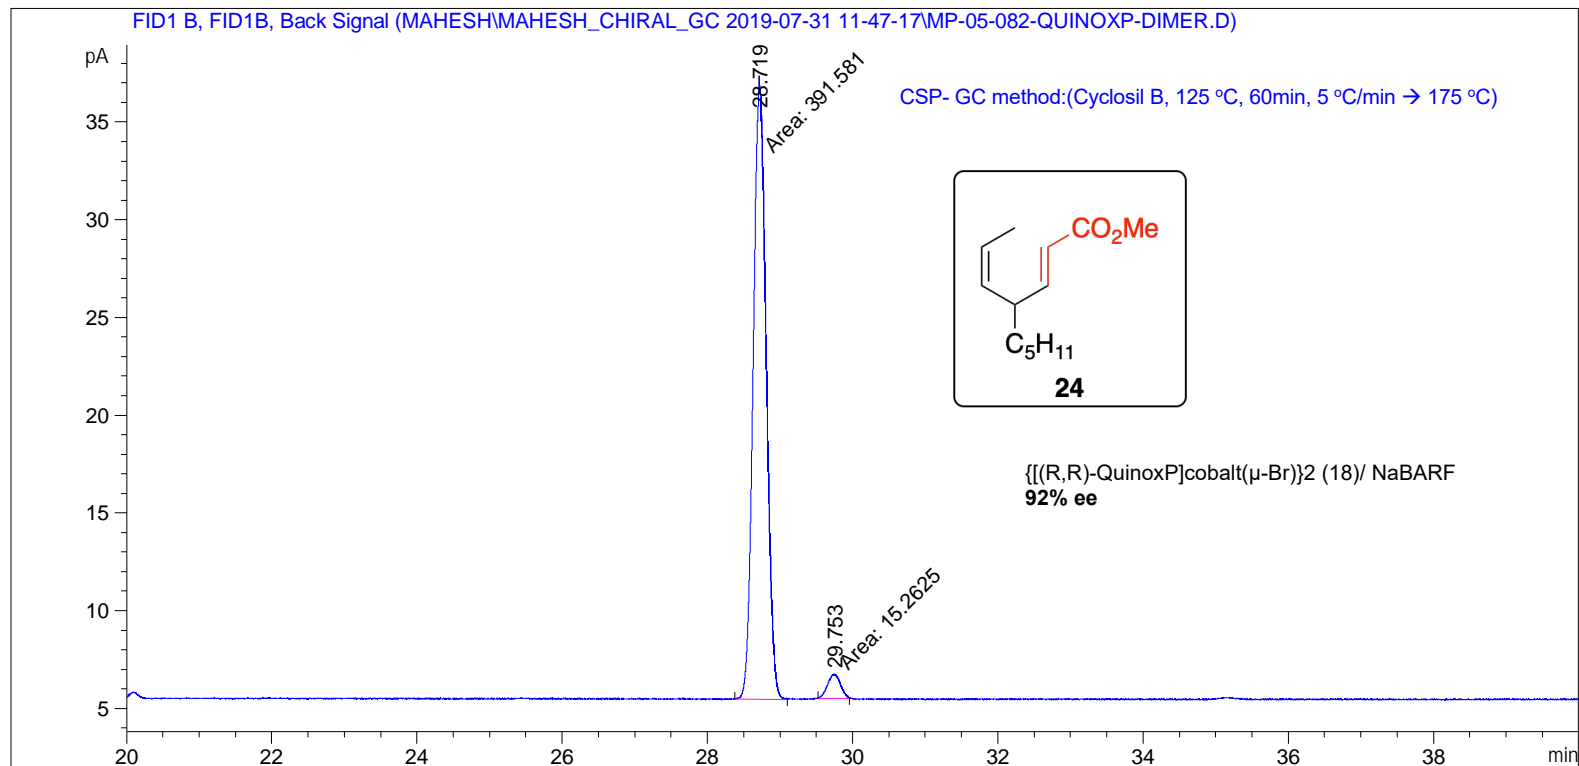

=====  
Area Percent Report  
=====

Sorted By : Signal  
Multiplier: : 1.0000  
Dilution: : 1.0000  
Use Multiplier & Dilution Factor with ISTDs

Signal 1: FID1 B, FID1B, Back Signal

| Peak # | RetTime [min] | Type | Width [min] | Area [pA*s] | Height [pA] | Area %   |
|--------|---------------|------|-------------|-------------|-------------|----------|
| 1      | 28.719        | MM   | 0.2052      | 391.58096   | 31.80393    | 96.24855 |
| 2      | 29.753        | MM   | 0.2061      | 15.26251    | 1.23429     | 3.75145  |



Sample Name: MP-06-quinexpCo(C6D6)-10H

```

=====
Acq. Operator   : MP
Acq. Instrument : Instrument 1                      Location : Vial 1
Injection Date  : 7/21/2020 6:34:34 PM
                                           Inj Volume : 1 µl

Acq. Method     : C:\CHEM32\1\METHODS\MP-80-RAMP.M
Last changed    : 11/9/2018 7:49:41 PM by mahesh
Analysis Method : C:\CHEM32\1\METHODS\MP-80-RAMP.M
Last changed    : 7/22/2020 8:44:37 PM by Jon
                 (modified after loading)

Method Info     : General Higher BP that correlates to Stambuli Group's GCMS - 30 min
=====

```

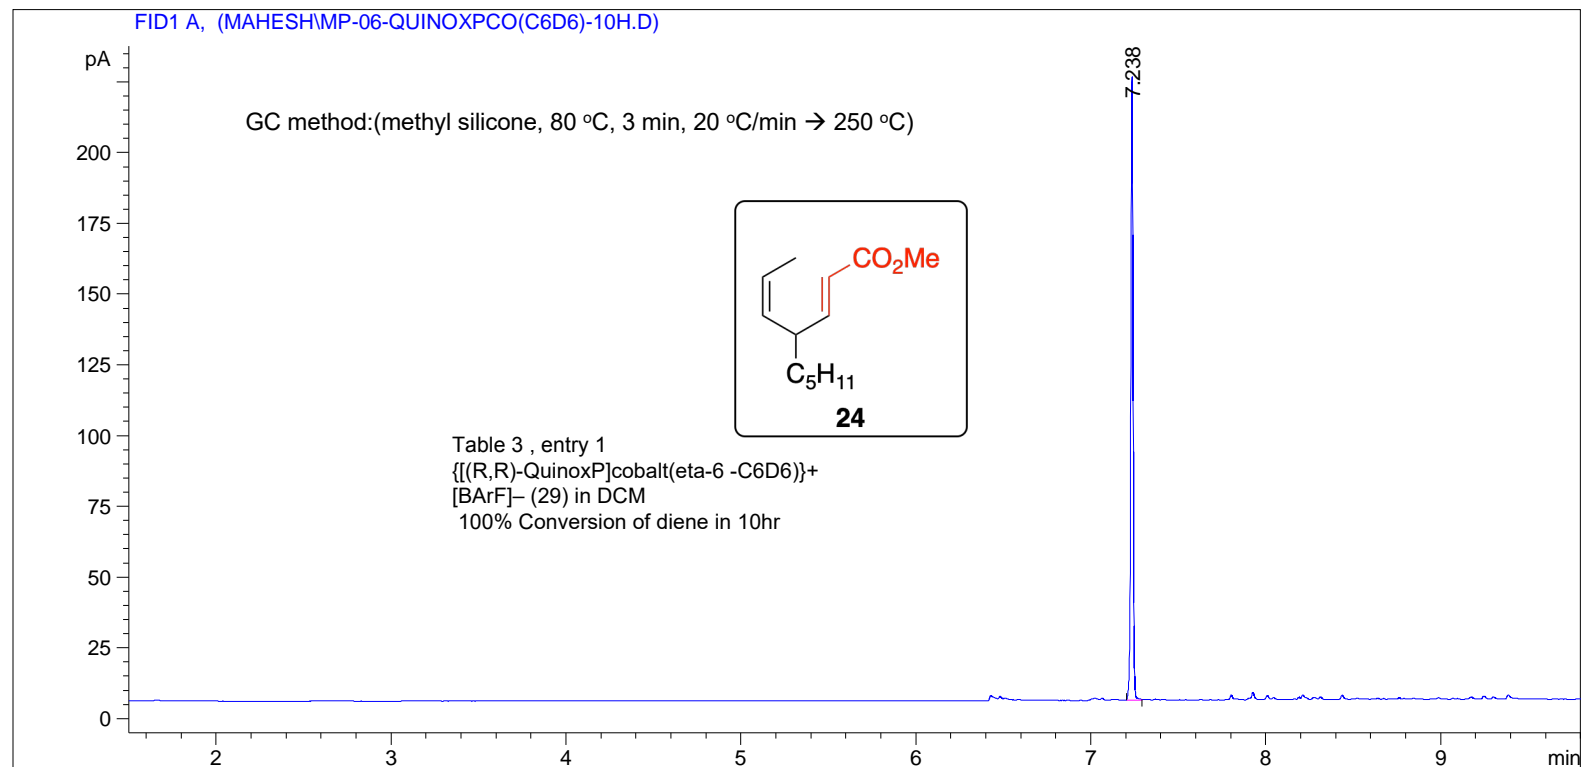

```

=====
Area Percent Report
=====

```

```

Sorted By      :      Signal
Multiplier:    :      1.0000
Dilution:     :      1.0000
Use Multiplier & Dilution Factor with ISTDs

```

Signal 1: FID1 A,

| Peak # | RetTime [min] | Type | Width [min] | Area [pA*s] | Height [pA] | Area %   |
|--------|---------------|------|-------------|-------------|-------------|----------|
| 1      | 0.885         | BB S | 0.0123      | 6.27043e4   | 6.80424e4   | 99.49537 |
| 2      | 1.174         | BV   | 0.0177      | 121.58495   | 114.02174   | 0.19292  |
| 3      | 7.238         | BV   | 0.0139      | 196.44603   | 220.20207   | 0.31171  |

```

=====
Acq. Operator   : MP                               Seq. Line :    2
Acq. Instrument : Instrument 1                     Location  : Vial 203
Injection Date  : 7/18/2020 8:15:04 PM           Inj       :    1
                                                    Inj Volume: 1 µl

Acq. Method    : C:\CHEM32.NEW\1\DATA\MAHESH\MAHESH_CHIRAL_GC 2020-07-18 12-31-03\MP-125-ISO-
                CHIRAL-CYCLOSIL.M

Last changed   : 2/16/2020 6:29:57 PM by MP
Analysis Method : C:\CHEM32.NEW\1\METHODS\LI-90-ISO300-RAMP5-CYCLOSIL.M
Last changed   : 7/19/2020 6:47:53 PM by MP
                (modified after loading)

Additional Info : Peak(s) manually integrated
  
```

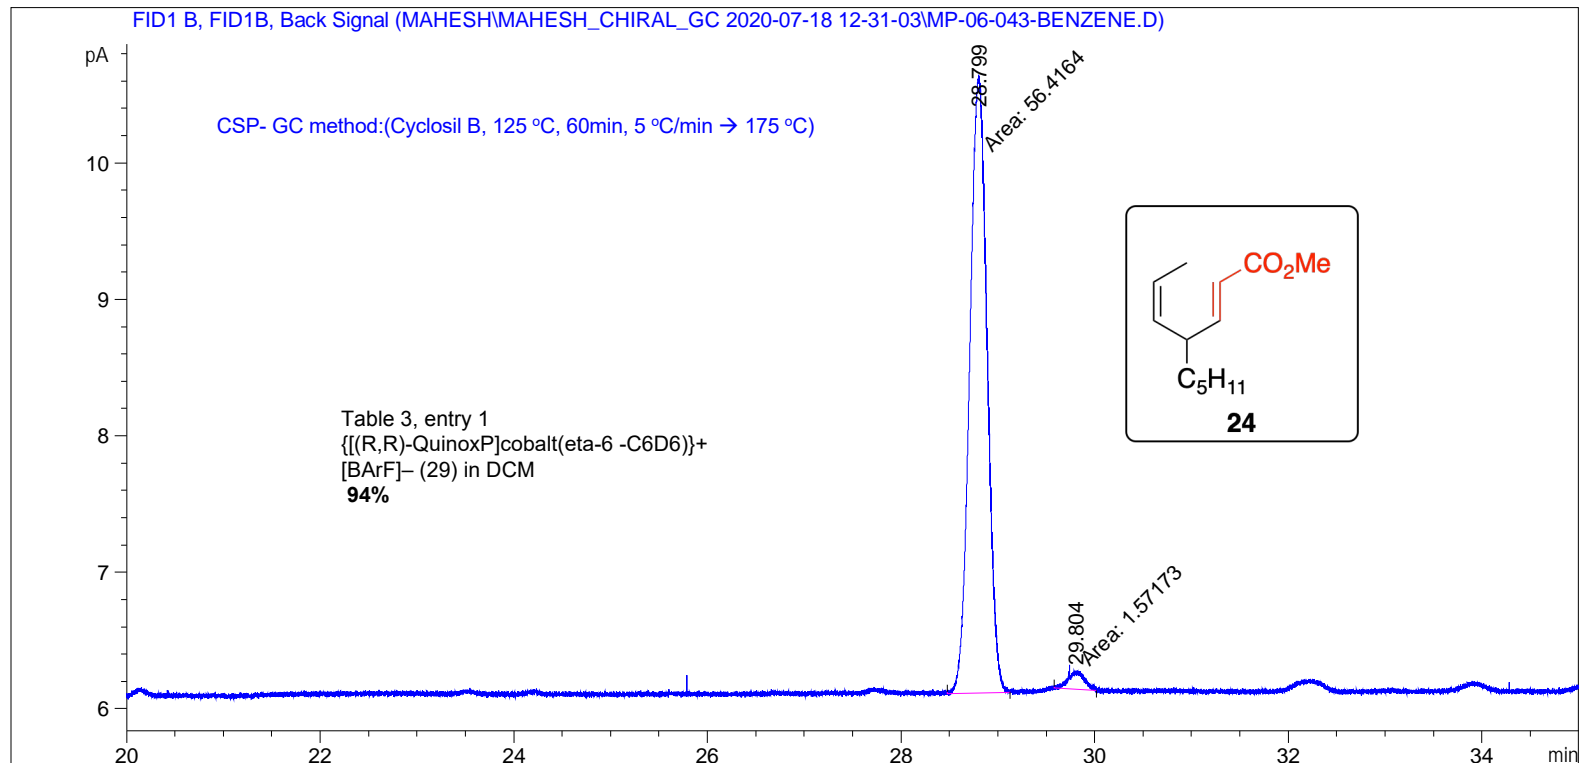

Area Percent Report

```

Sorted By      :      Signal
Multiplier:    :      1.0000
Dilution:      :      1.0000
Use Multiplier & Dilution Factor with ISTDs
  
```

Signal 1: FID1 B, FID1B, Back Signal

| Peak # | RetTime [min] | Type | Width [min] | Area [pA*s] | Height [pA] | Area %   |
|--------|---------------|------|-------------|-------------|-------------|----------|
| 1      | 28.799        | MM   | 0.2078      | 56.41642    | 4.52521     | 97.28958 |
| 2      | 29.804        | MM   | 0.1873      | 1.57173     | 1.39847e-1  | 2.71042  |

```

=====
Acq. Operator   : MP                               Seq. Line :    2
Acq. Instrument : Instrument 1                     Location  : Vial 203
Injection Date  : 7/18/2020 8:15:04 PM           Inj       :    1
                                                    Inj Volume: 1 µl

Acq. Method     : C:\CHEM32.NEW\1\DATA\MAHESH\MAHESH_CHIRAL_GC 2020-07-18 12-31-03\MP-125-ISO-
                  CHIRAL-CYCLOSIL.M
Last changed    : 2/16/2020 6:29:57 PM by MP
Analysis Method  : C:\CHEM32.NEW\1\METHODS\LI-90-ISO300-RAMP5-CYCLOSIL.M
Last changed    : 7/21/2020 8:30:01 PM by MP
                  (modified after loading)
Additional Info  : Peak(s) manually integrated
  
```

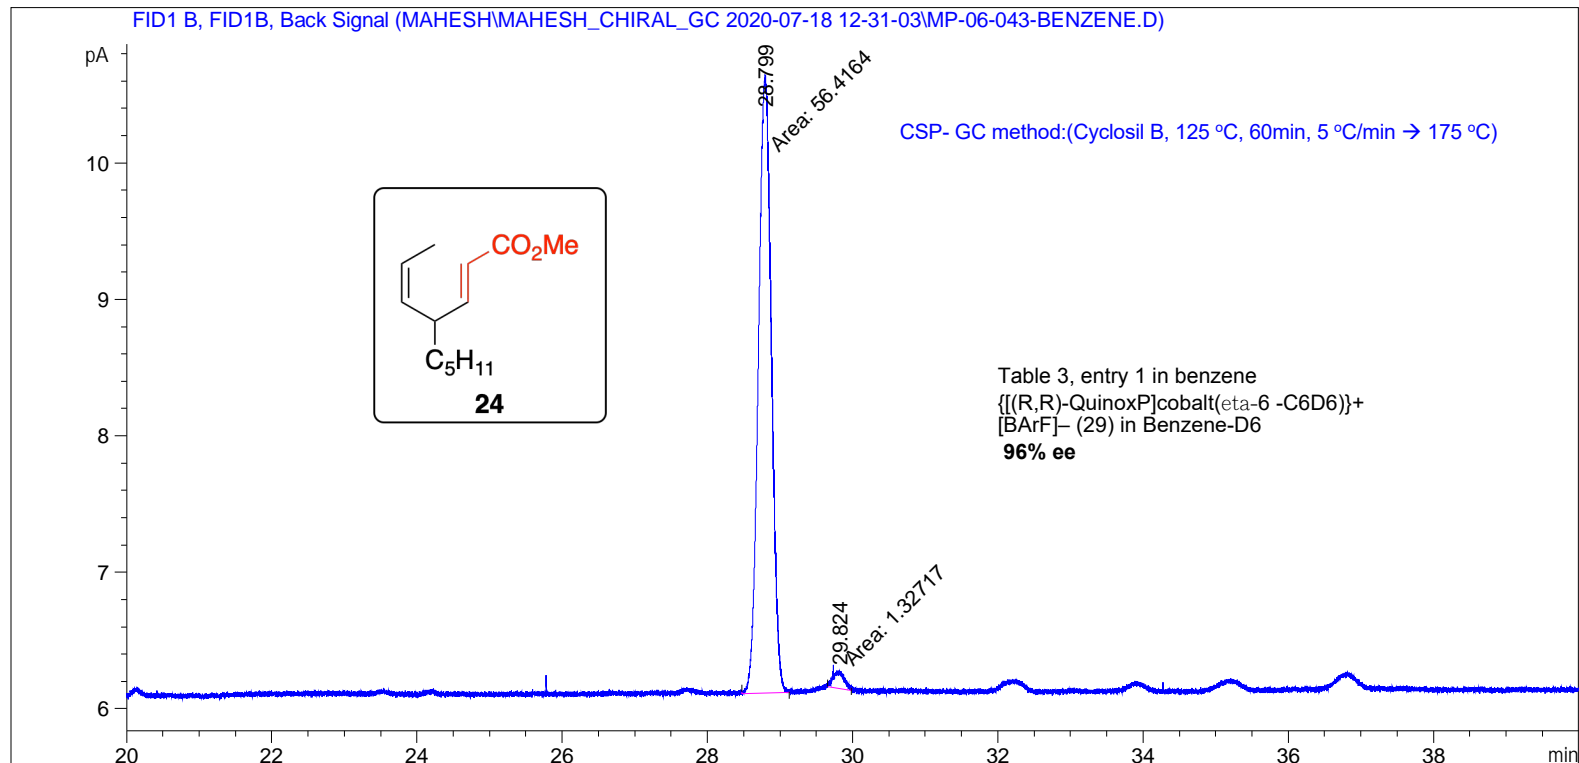

=====  
 Area Percent Report  
 =====

```

Sorted By      :      Signal
Multiplier:    :      1.0000
Dilution:      :      1.0000
Use Multiplier & Dilution Factor with ISTDs
  
```

Signal 1: FID1 B, FID1B, Back Signal

| Peak # | RetTime [min] | Type | Width [min] | Area [pA*s] | Height [pA] | Area %   |
|--------|---------------|------|-------------|-------------|-------------|----------|
| 1      | 28.799        | MM   | 0.2078      | 56.41642    | 4.52521     | 97.70162 |
| 2      | 29.824        | MM   | 0.1712      | 1.32717     | 1.29218e-1  | 2.29838  |

**Table S2, Entry 2**

GC Conditions: HP-5MS, 100°C, 5 min, 20°C/min to 250°C

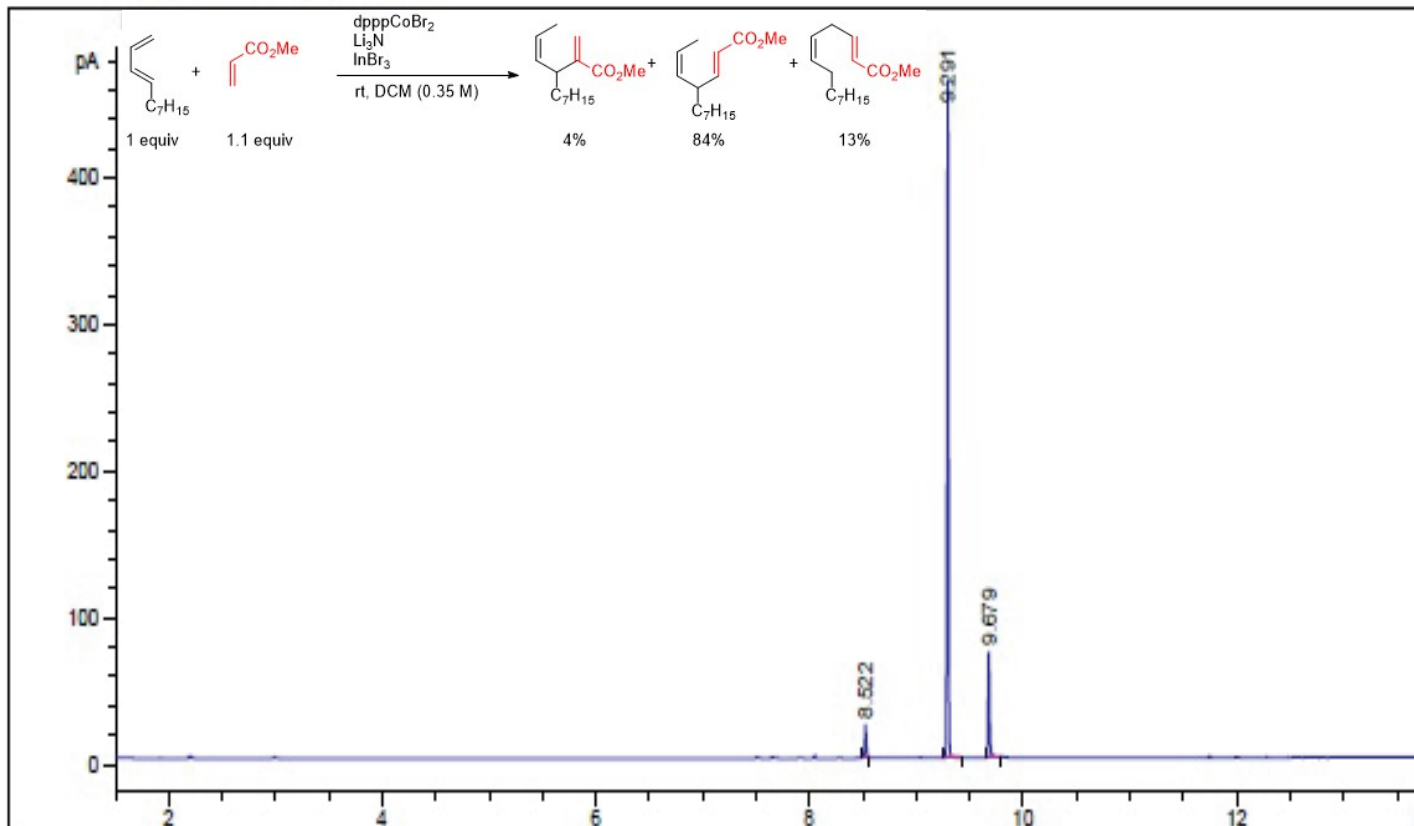

=====  
**Area Percent Report**  
 =====

Sorted By : Signal  
 Multiplier: : 1.0000  
 Dilution: : 1.0000  
 Use Multiplier & Dilution Factor with ISTDs

Signal 1: FID1 A,

| Peak # | RetTime [min] | Type | Width [min] | Area [pA*s] | Height [pA] | Area %   |
|--------|---------------|------|-------------|-------------|-------------|----------|
| 1      | 8.522         | VV   | 0.0157      | 22.69189    | 22.68320    | 4.16608  |
| 2      | 9.291         | VB   | 0.0148      | 446.72842   | 459.56573   | 82.01640 |
| 3      | 9.679         | BV   | 0.0160      | 75.26148    | 72.93928    | 13.81751 |

**Table S2, Entry 5**  
 GC Conditions: HP-5MS, 100°C, 5 min, 20°C/min to 250°C

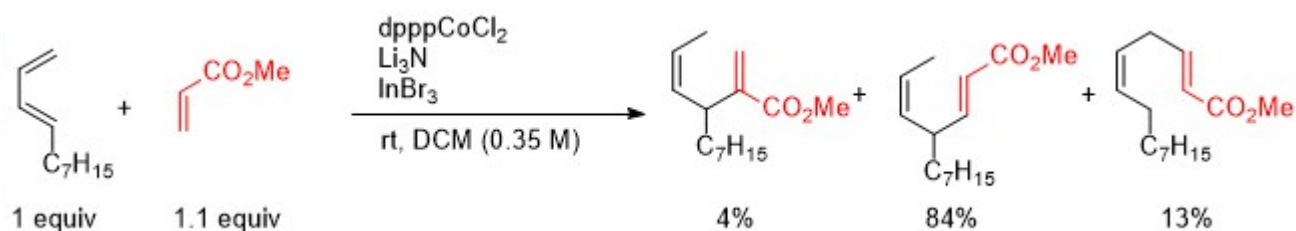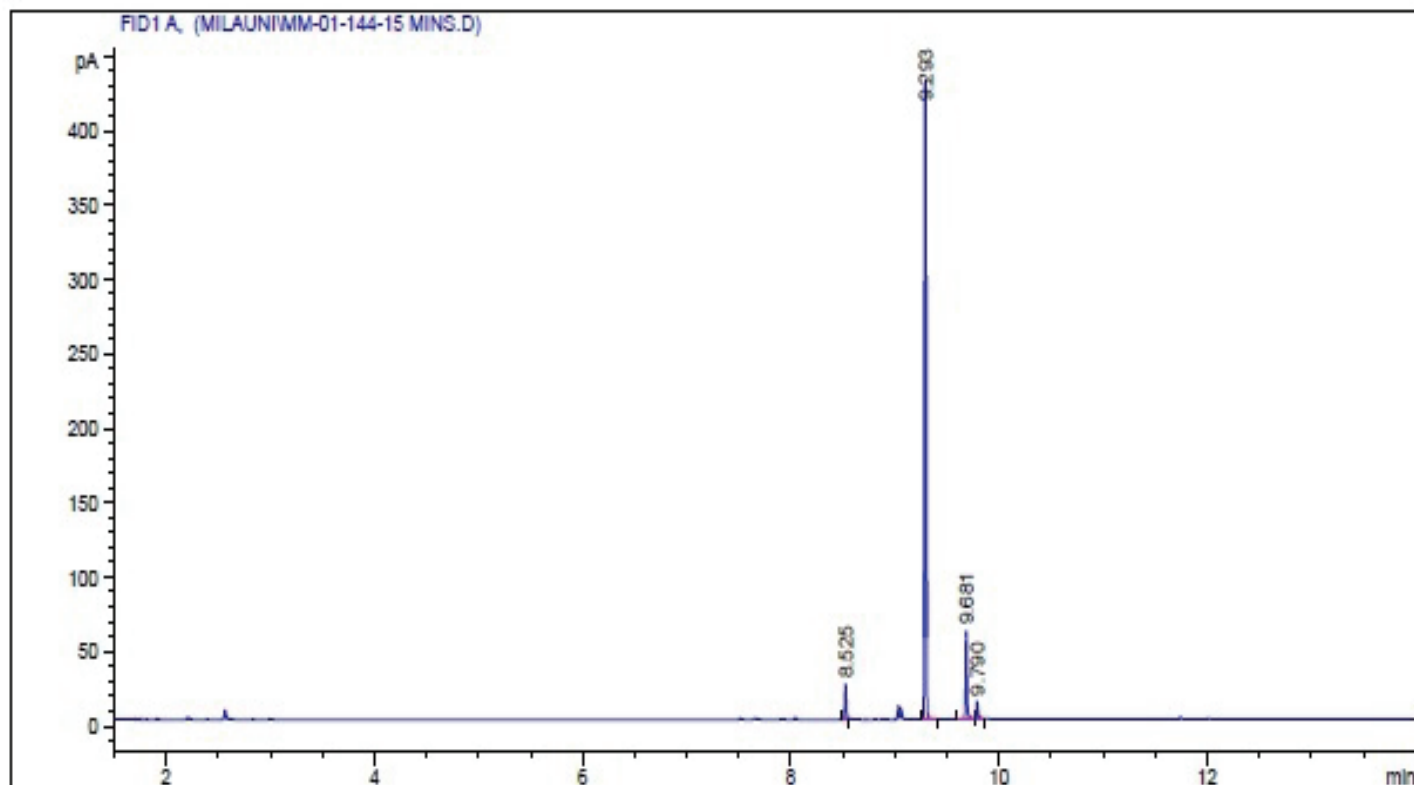

Signal 1: FID1 A,

| Peak # | RetTime [min] | Type | Width [min] | Area [pA*s] | Height [pA] | Area %   |
|--------|---------------|------|-------------|-------------|-------------|----------|
| 1      | 8.525         | VV   | 0.0156      | 22.95272    | 23.15723    | 4.48849  |
| 2      | 9.293         | VV   | 0.0152      | 411.92584   | 428.89218   | 80.55358 |
| 3      | 9.681         | VV   | 0.0156      | 61.52719    | 59.30364    | 12.03186 |
| 4      | 9.790         | VV   | 0.0187      | 14.96301    | 11.84402    | 2.92607  |

Totals :                      511.36876    523.19708

Sample Name: MP-06-128-CAT-CO-40H

```

=====
Acq. Operator   : MP
Acq. Instrument : Instrument 1
Injection Date  : 11/12/2020 3:57:05 PM
Location       : Vial 16
Inj Volume     : 1 µl
Acq. Method    : C:\CHEM32\1\METHODS\MP-80-RAMP.M
Last changed   : 11/9/2018 7:49:41 PM by mahesh
Analysis Method : C:\CHEM32\1\METHODS\MP-80-RAMP.M
Last changed   : 3/24/2021 5:11:47 PM by Jon
                (modified after loading)
Method Info    : General Higher BP that correlates to Stambuli Group's GCMS - 30 min
  
```

Additional Info : Peak(s) manually integrated

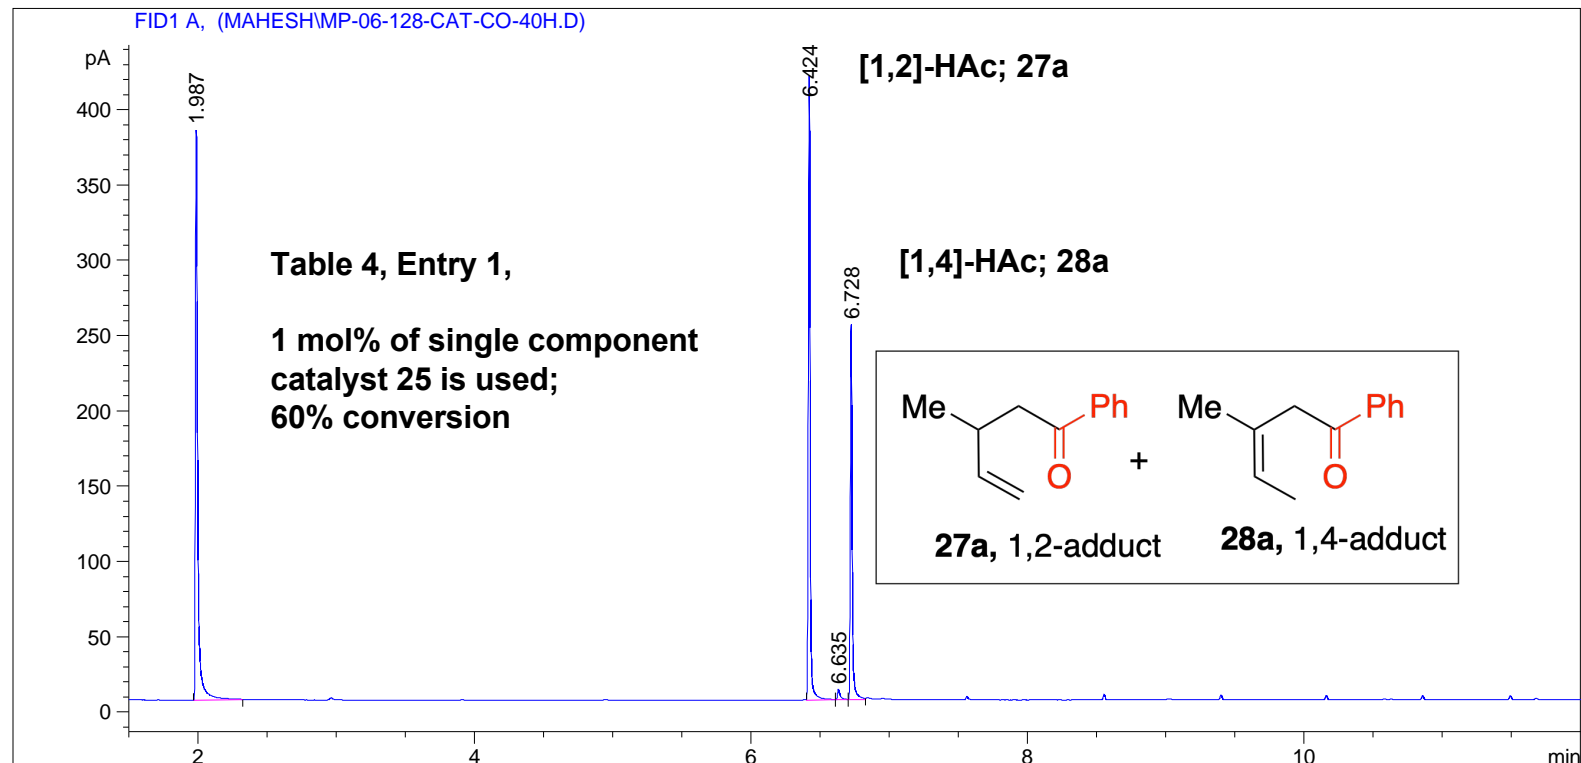

```

=====
Area Percent Report
=====
  
```

```

Sorted By      :      Signal
Multiplier:    :      1.0000
Dilution:      :      1.0000
Use Multiplier & Dilution Factor with ISTDs
  
```

Signal 1: FID1 A,

| Peak # | RetTime [min] | Type | Width [min] | Area [pA*s] | Height [pA] | Area %   |
|--------|---------------|------|-------------|-------------|-------------|----------|
| 1      | 1.987         | BB   | 0.0179      | 450.20267   | 378.57123   | 41.48139 |
| 2      | 6.424         | VV   | 0.0142      | 387.87872   | 414.54257   | 35.73890 |

Sample Name: MP-06-128-CAT-CO-40H

| Peak # | RetTime [min] | Type | Width [min] | Area [pA*s] | Height [pA] | Area %   |
|--------|---------------|------|-------------|-------------|-------------|----------|
| 3      | 6.635         | VV   | 0.0209      | 10.34493    | 7.13682     | 0.95318  |
| 4      | 6.728         | VV   | 0.0143      | 236.88599   | 249.32899   | 21.82653 |

Totals : 1085.31231 1049.57961

=====  
\*\*\* End of Report \*\*\*

Sample Name: MP-07-016-INSITU-IPRDUPHOSCO-PHCHO-ISOPR

```

=====
Acq. Operator   : MP
Acq. Instrument : Instrument 1                      Location : Vial 15
Injection Date  : 3/30/2021 5:49:40 PM
                                           Inj Volume : 1 µl

Acq. Method     : C:\CHEM32\1\METHODS\MP-80-RAMP.M
Last changed    : 3/30/2021 5:46:01 PM by MP
Analysis Method  : C:\CHEM32\1\METHODS\MP-80-RAMP.M
Last changed    : 3/30/2021 4:15:28 PM by MP
                 (modified after loading)
Method Info     : General Higher BP that correlates to Stambuli Group's GCMS - 30 min
=====

```

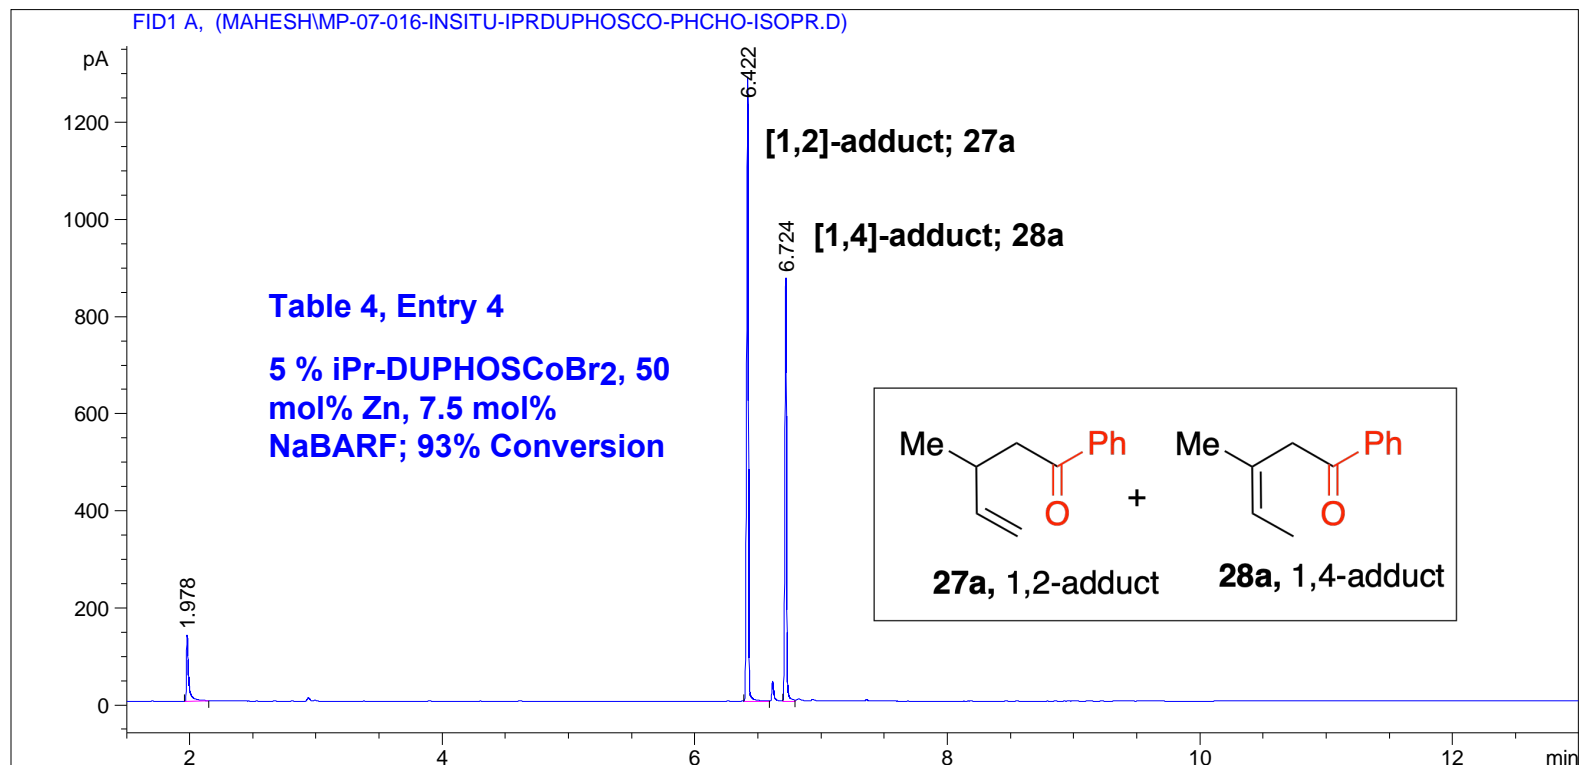

```

=====
                          Area Percent Report
=====

```

```

Sorted By           :      Signal
Multiplier:         :      1.0000
Dilution:           :      1.0000
Use Multiplier & Dilution Factor with ISTDs

```

Signal 1: FID1 A,

| Peak # | RetTime [min] | Type | Width [min] | Area [pA*s] | Height [pA] | Area %   |
|--------|---------------|------|-------------|-------------|-------------|----------|
| 1      | 1.978         | VV   | 0.0182      | 171.60773   | 136.51401   | 7.57846  |
| 2      | 6.422         | VV   | 0.0157      | 1286.15295  | 1287.02148  | 56.79845 |
| 3      | 6.724         | VV   | 0.0140      | 806.65472   | 872.00439   | 35.62309 |



=====  
Acq. Operator : MP  
Acq. Instrument : Instrument 1 Location : Vial 14  
Injection Date : 3/30/2021 6:08:39 PM  
Inj Volume : 1 µl  
Acq. Method : C:\CHEM32\1\METHODS\MP-80-RAMP.M  
Last changed : 3/30/2021 6:05:04 PM by MP  
Analysis Method : C:\CHEM32\1\METHODS\MP-80-RAMP.M  
Last changed : 3/30/2021 4:15:28 PM by MP  
(modified after loading)  
Method Info : General Higher BP that correlates to Stambuli Group's GCMS - 30 min

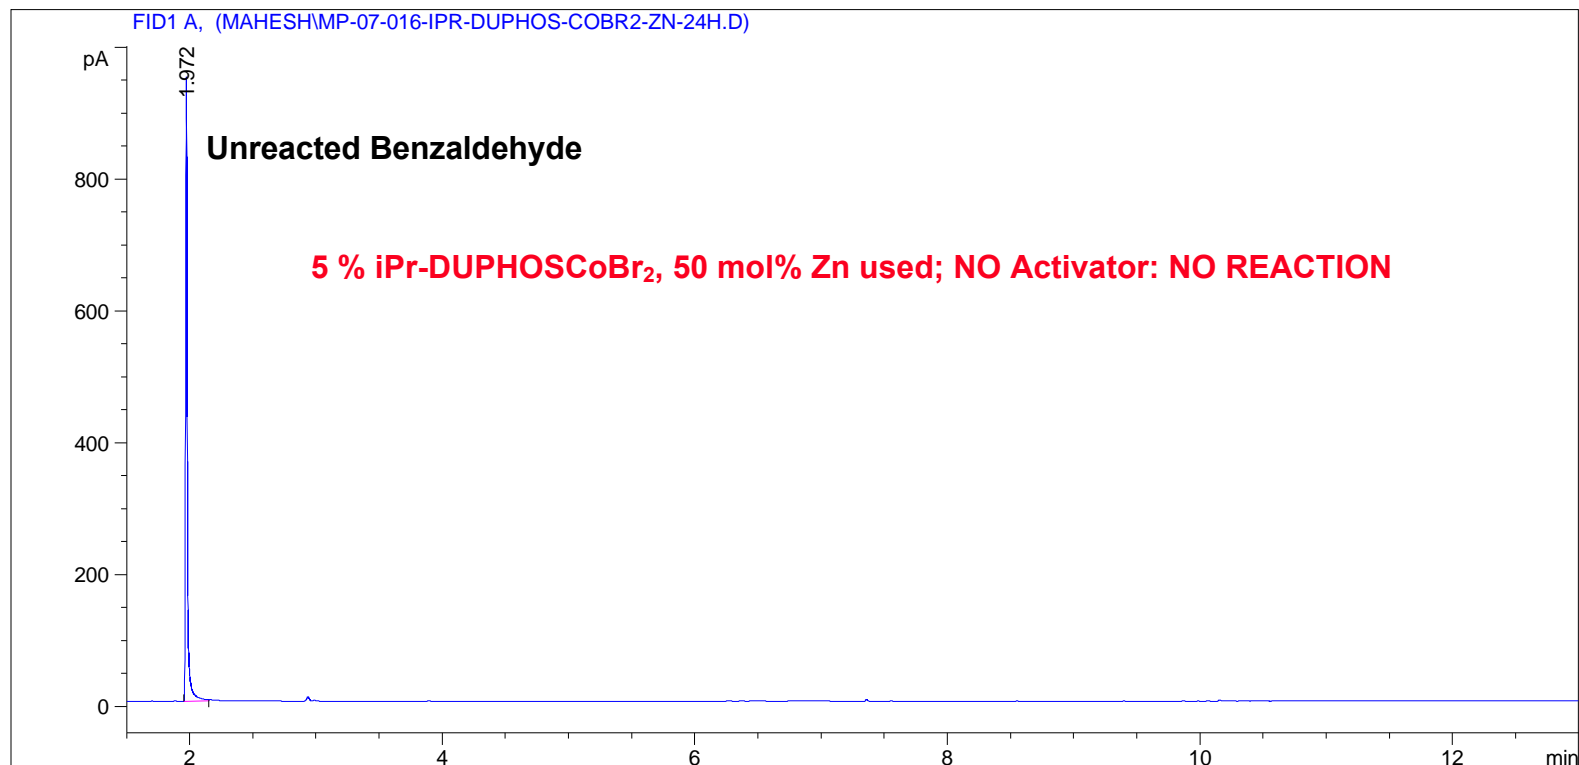

=====  
Area Percent Report  
=====

Sorted By : Signal  
Multiplier: : 1.0000  
Dilution: : 1.0000  
Use Multiplier & Dilution Factor with ISTDs

Signal 1: FID1 A,

| Peak # | RetTime [min] | Type | Width [min] | Area [pA*s] | Height [pA] | Area %  |
|--------|---------------|------|-------------|-------------|-------------|---------|
| 1      | 1.972         | VV   | 0.0156      | 964.46014   | 948.07062   | 1.000e2 |

Totals : 964.46014 948.07062

Sample Name: MP-07-016-ISOLATED-IPR-DUPHOSCOCL-CRYSTA

```

=====
Acq. Operator   : MP
Acq. Instrument : Instrument 1                      Location : Vial 16
Injection Date  : 3/30/2021 5:29:31 PM
                                           Inj Volume : 1 µl

Acq. Method     : C:\CHEM32\1\METHODS\MP-80-RAMP.M
Last changed    : 3/30/2021 4:51:34 PM by DS
Analysis Method  : C:\CHEM32\1\METHODS\MP-80-RAMP.M
Last changed    : 3/30/2021 4:15:28 PM by MP
                  (modified after loading)
Method Info     : General Higher BP that correlates to Stambuli Group's GCMS - 30 min

```

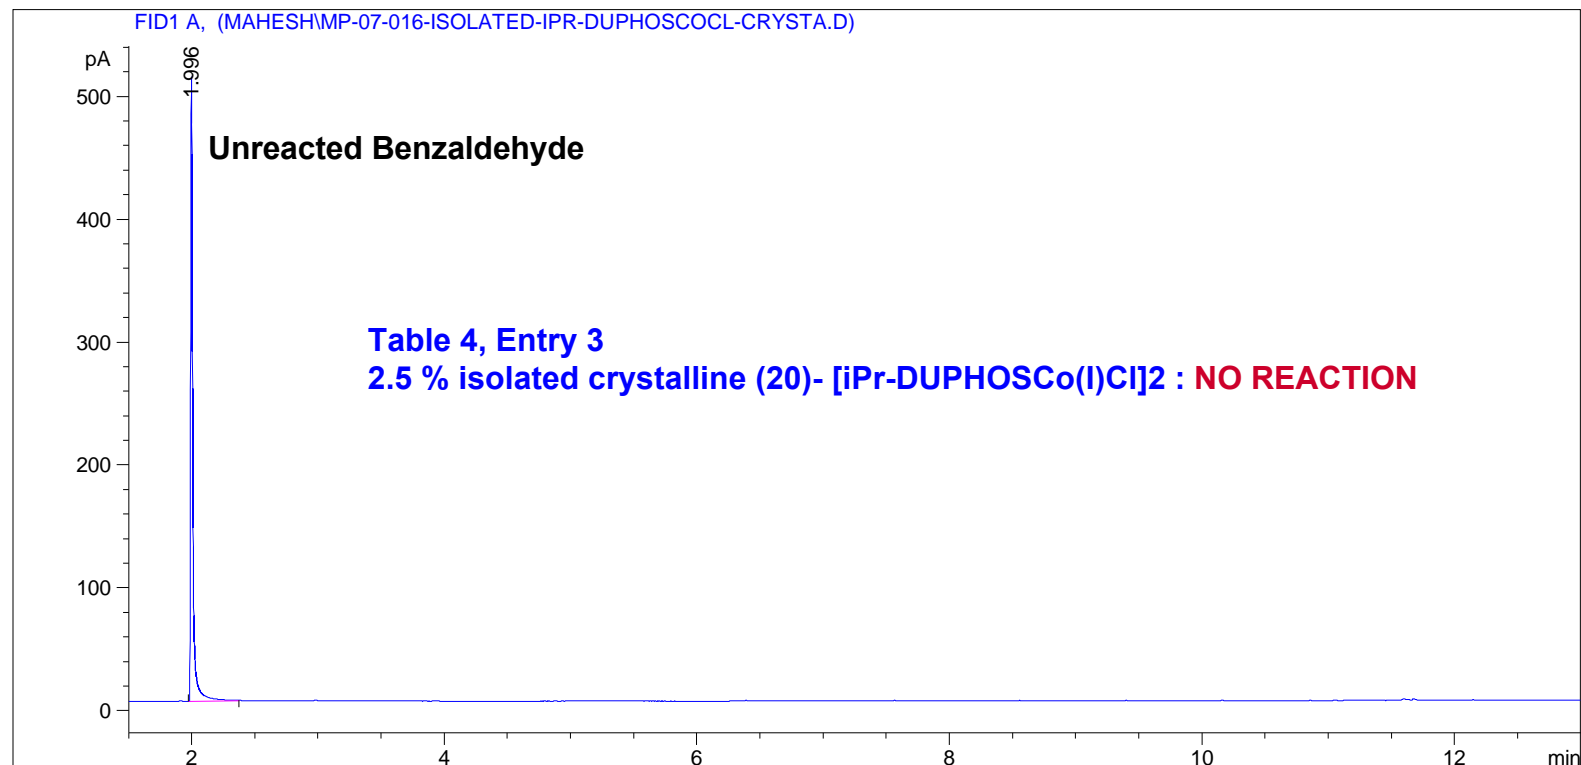

```

=====
                          Area Percent Report
=====

```

```

Sorted By           :      Signal
Multiplier:         :      1.0000
Dilution:           :      1.0000
Use Multiplier & Dilution Factor with ISTDs

```

Signal 1: FID1 A,

| Peak # | RetTime [min] | Type | Width [min] | Area [pA*s] | Height [pA] | Area %  |
|--------|---------------|------|-------------|-------------|-------------|---------|
| 1      | 1.996         | BB   | 0.0183      | 610.35071   | 508.30597   | 1.000e2 |

```
Totals :                610.35071  508.30597
```

=====  
Acq. Operator : LI  
Acq. Instrument : Instrument 1 Location : Vial 202  
Injection Date : 3/12/2020 10:06:09 PM Inj Volume : 1 µl  
Acq. Method : C:\CHEM32.NEW\1\METHODS\MP-100-ISO300-CHIRAL.M  
Last changed : 3/12/2020 10:04:28 PM by LI  
(modified after loading)  
Analysis Method : C:\CHEM32.NEW\1\METHODS\LI-90-ISO300-RAMP5-CYCLOSIL.M  
Last changed : 8/19/2020 4:47:20 PM by MP  
(modified after loading)  
Sample Info : 100-300-1-175-20

Additional Info : Peak(s) manually integrated

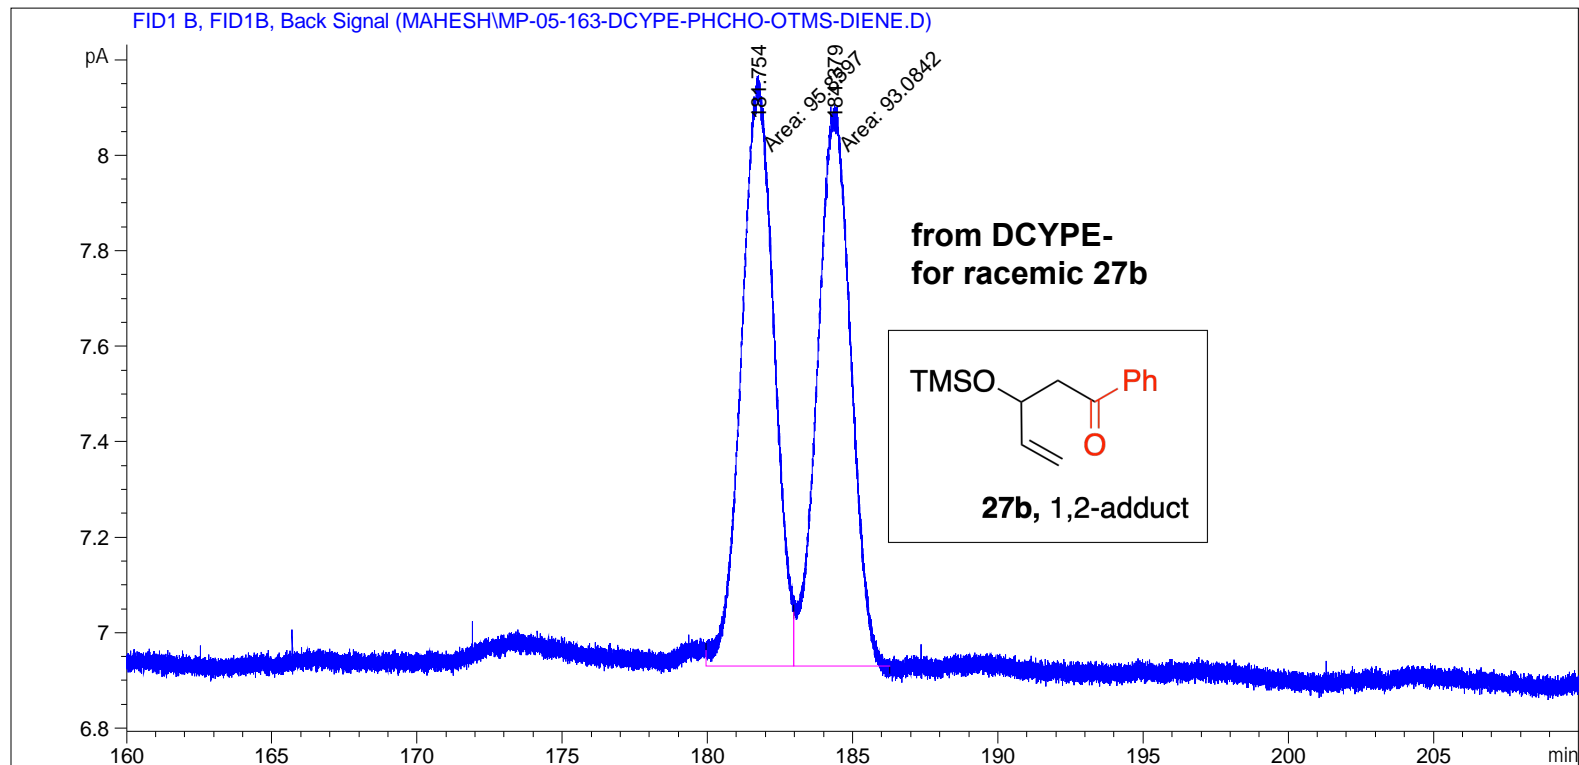

=====  
Area Percent Report  
=====

Sorted By : Signal  
Multiplier: : 1.0000  
Dilution: : 1.0000  
Use Multiplier & Dilution Factor with ISTDs

Sample Name: MP-05-163-DCYPE-PHCHO-OTMS-DIENE

Signal 1: FID1 B, FID1B, Back Signal

| Peak # | RetTime [min] | Type | Width [min] | Area [pA*s] | Height [pA] | Area %   |
|--------|---------------|------|-------------|-------------|-------------|----------|
| 1      | 181.754       | MF   | 1.3040      | 95.85970    | 1.22524     | 50.73448 |
| 2      | 184.379       | FM   | 1.3261      | 93.08420    | 1.16987     | 49.26552 |

Totals : 188.94390 2.39511

=====  
\*\*\* End of Report \*\*\*

=====  
Acq. Operator : LI  
Acq. Instrument : Instrument 1 Location : Vial 202  
Injection Date : 3/13/2020 12:00:37 PM Inj Volume : 1 µl  
Acq. Method : C:\CHEM32.NEW\1\METHODS\MP-100-ISO300-CHIRAL.M  
Last changed : 3/13/2020 4:18:32 PM by LI  
(modified after loading)  
Analysis Method : C:\CHEM32.NEW\1\METHODS\LI-90-ISO300-RAMP5-CYCLOSIL.M  
Last changed : 8/19/2020 4:47:20 PM by MP  
(modified after loading)  
Sample Info : 100-300-1-175-20

Additional Info : Peak(s) manually integrated

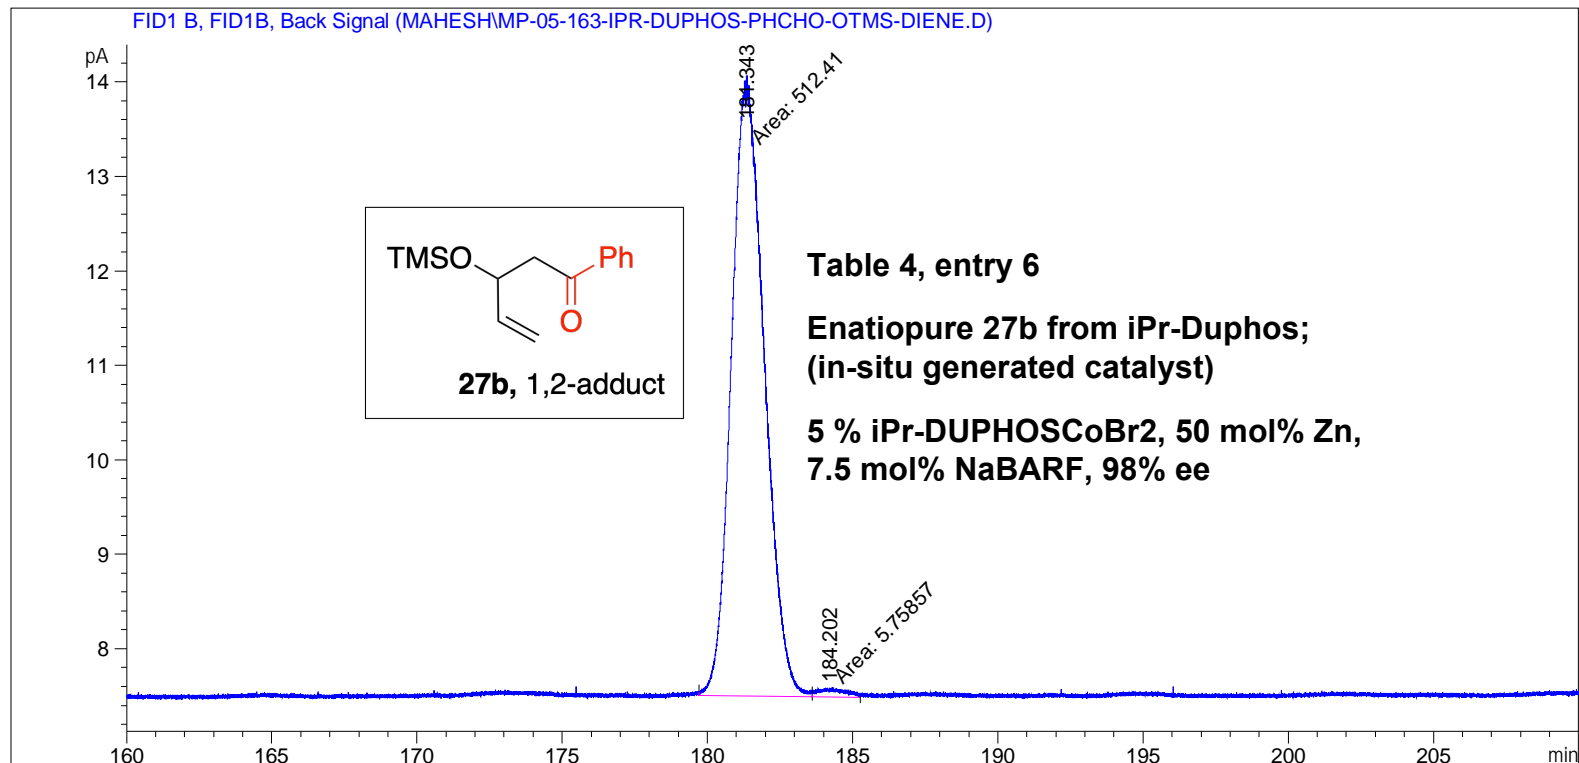

=====  
Area Percent Report  
=====

Sorted By : Signal  
Multiplier: : 1.0000  
Dilution: : 1.0000  
Use Multiplier & Dilution Factor with ISTDs

Sample Name: MP-05-163-IPR-DUPHOS-PHCHO-OTMS-DIENE.D

Signal 1: FID1 B, FID1B, Back Signal

| Peak # | RetTime [min] | Type | Width [min] | Area [pA*s] | Height [pA] | Area %   |
|--------|---------------|------|-------------|-------------|-------------|----------|
| 1      | 181.343       | MF   | 1.2998      | 512.41040   | 6.57039     | 35.55996 |
| 2      | 184.202       | FM   | 0.9961      | 5.75857     | 9.63546e-2  | 0.39963  |
| 3      | 239.486       | MM   | 1.7411      | 922.80695   | 8.83366     | 64.04041 |

Totals : 1440.97592 15.50040

=====  
\*\*\* End of Report \*\*\*

=====  
Acq. Operator : MP Seq. Line : 2  
Acq. Instrument : Instrument 1 Location : Vial 202  
Injection Date : 3/30/2021 5:13:28 AM Inj : 1  
Inj Volume : 1 µl  
Acq. Method : C:\CHEM32.NEW\1\DATA\DIPSHI\MAHESH\_CHIRAL\_GC 2021-03-29 21-29-33\MP-100-  
ISO300-CHIRAL.M  
Last changed : 7/28/2020 9:06:06 PM by MP  
Analysis Method : C:\CHEM32.NEW\1\METHODS\LI-90-ISO300-RAMP5-CYCLOSIL.M  
Last changed : 3/30/2021 6:38:48 PM by Jon  
(modified after loading)  
Additional Info : Peak(s) manually integrated

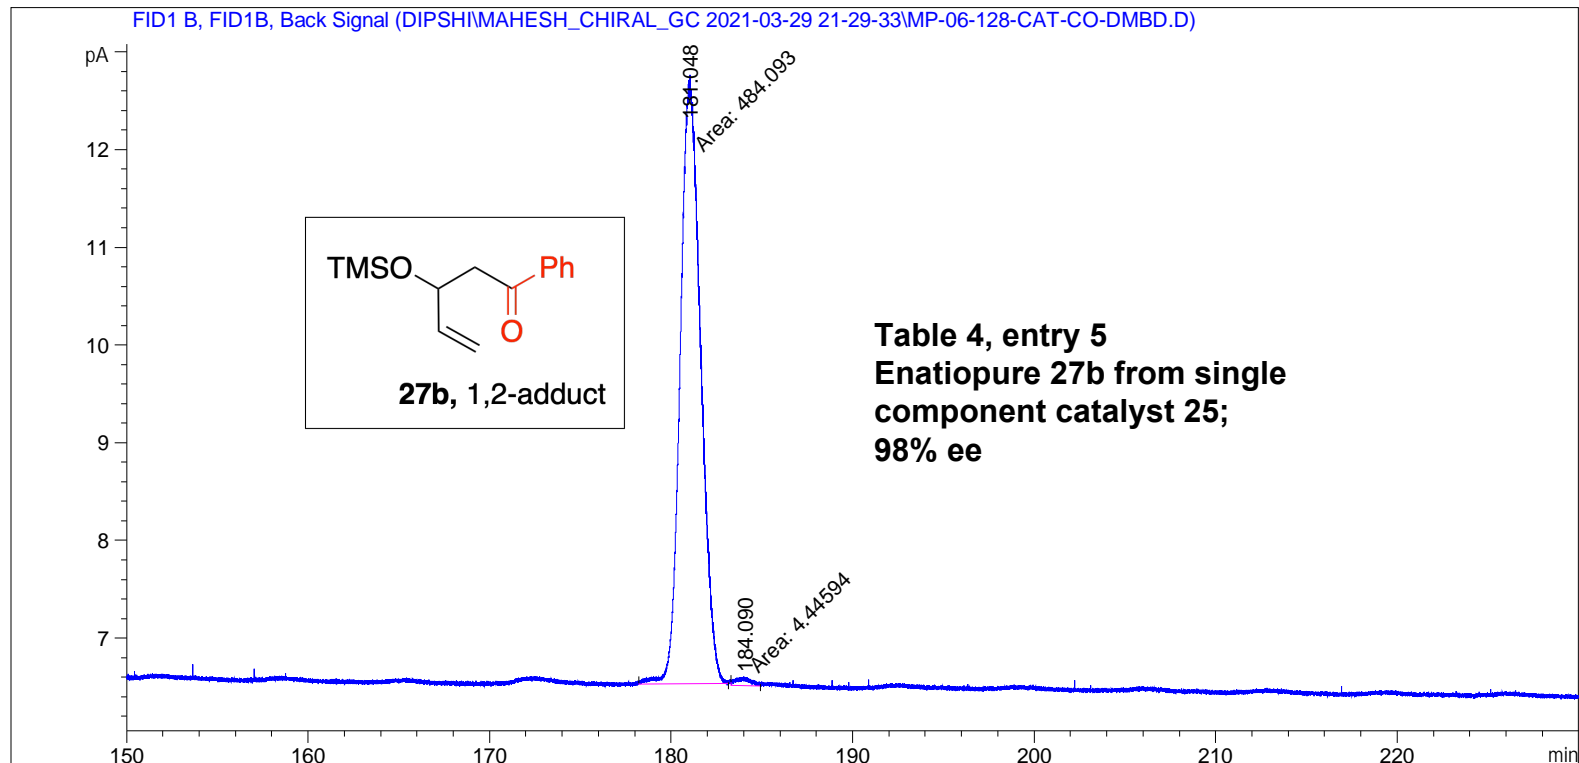

=====  
Area Percent Report  
=====

Sorted By : Signal  
Multiplier: : 1.0000  
Dilution: : 1.0000  
Use Multiplier & Dilution Factor with ISTDs

Signal 1: FID1 B, FID1B, Back Signal

| Peak # | RetTime [min] | Type | Width [min] | Area [pA*s] | Height [pA] | Area %   |
|--------|---------------|------|-------------|-------------|-------------|----------|
| 1      | 181.048       | MM   | 1.2931      | 484.09302   | 6.23937     | 99.08995 |
| 2      | 184.090       | FM   | 0.8991      | 4.44594     | 8.24168e-2  | 0.91005  |

Totals :                                   488.53896     6.32178

=====  
\*\*\* End of Report \*\*\*



Sample Name: MP-06-030-CAT-CO-2H.D

```

=====
Acq. Operator   : mp
Acq. Instrument : Instrument 1                      Location : Vial 2
Injection Date  : 6/23/2020 5:28:26 PM
                                           Inj Volume : 1 µl

Acq. Method     : C:\CHEM32\1\METHODS\50-RAMP.M
Last changed    : 3/5/2020 3:50:37 PM by MP
Analysis Method : C:\CHEM32\1\METHODS\MP-80-RAMP.M
Last changed    : 7/18/2020 2:32:42 PM by Jon
                 (modified after loading)
Method Info     : General Higher BP that correlates to Stambuli Group's GCMS - 30 min

Sample Info     : 2 MOL%
  
```

Additional Info : Peak(s) manually integrated

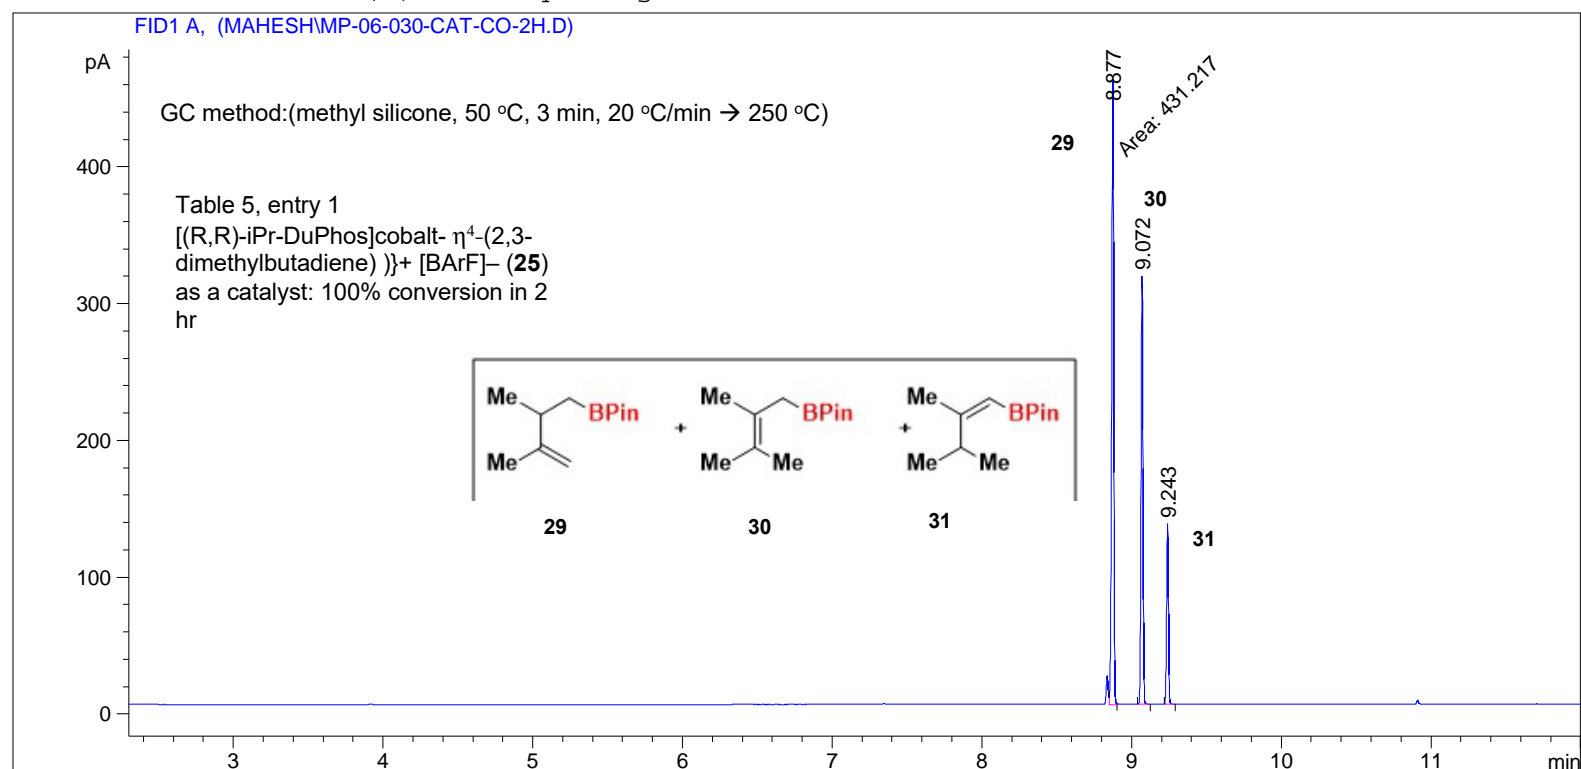

```

=====
                          Area Percent Report
=====
  
```

```

Sorted By           :      Signal
Multiplier:         :      1.0000
Dilution:           :      1.0000
Use Multiplier & Dilution Factor with ISTDs
  
```

Sample Name: MP-06-030-CAT-CO-2H.D

Signal 1: FID1 A,

| Peak # | RetTime [min] | Type | Width [min] | Area [pA*s] | Height [pA] | Area %   |
|--------|---------------|------|-------------|-------------|-------------|----------|
| 1      | 8.877         | FM   | 0.0157      | 431.21741   | 457.18283   | 52.94511 |
| 2      | 9.072         | BB   | 0.0133      | 270.53165   | 313.40701   | 33.21602 |
| 3      | 9.243         | BB   | 0.0132      | 112.71218   | 132.18829   | 13.83886 |

Totals : 814.46124 902.77814

=====  
\*\*\* End of Report \*\*\*

Sample Name: MP-06-028-CAT-CO-IPRDUPHOS-HB

```

=====
Acq. Operator   : MP
Acq. Instrument : Instrument 1                      Location : Vial 201
Injection Date  : 6/23/2020 8:01:07 PM
Inj Volume     : 1 µl
Acq. Method    : C:\CHEM32.NEW\1\METHODS\MP-90-30MIN-RAMP-CYCLOSIL.M
Last changed   : 6/19/2019 11:50:20 AM by MP
Analysis Method: C:\CHEM32.NEW\1\METHODS\MP-100-ISO300-CHIRAL.M
Last changed   : 7/7/2020 4:22:32 PM by MP
                (modified after loading)
Sample Info    : 2.5HR
  
```

Additional Info : Peak(s) manually integrated

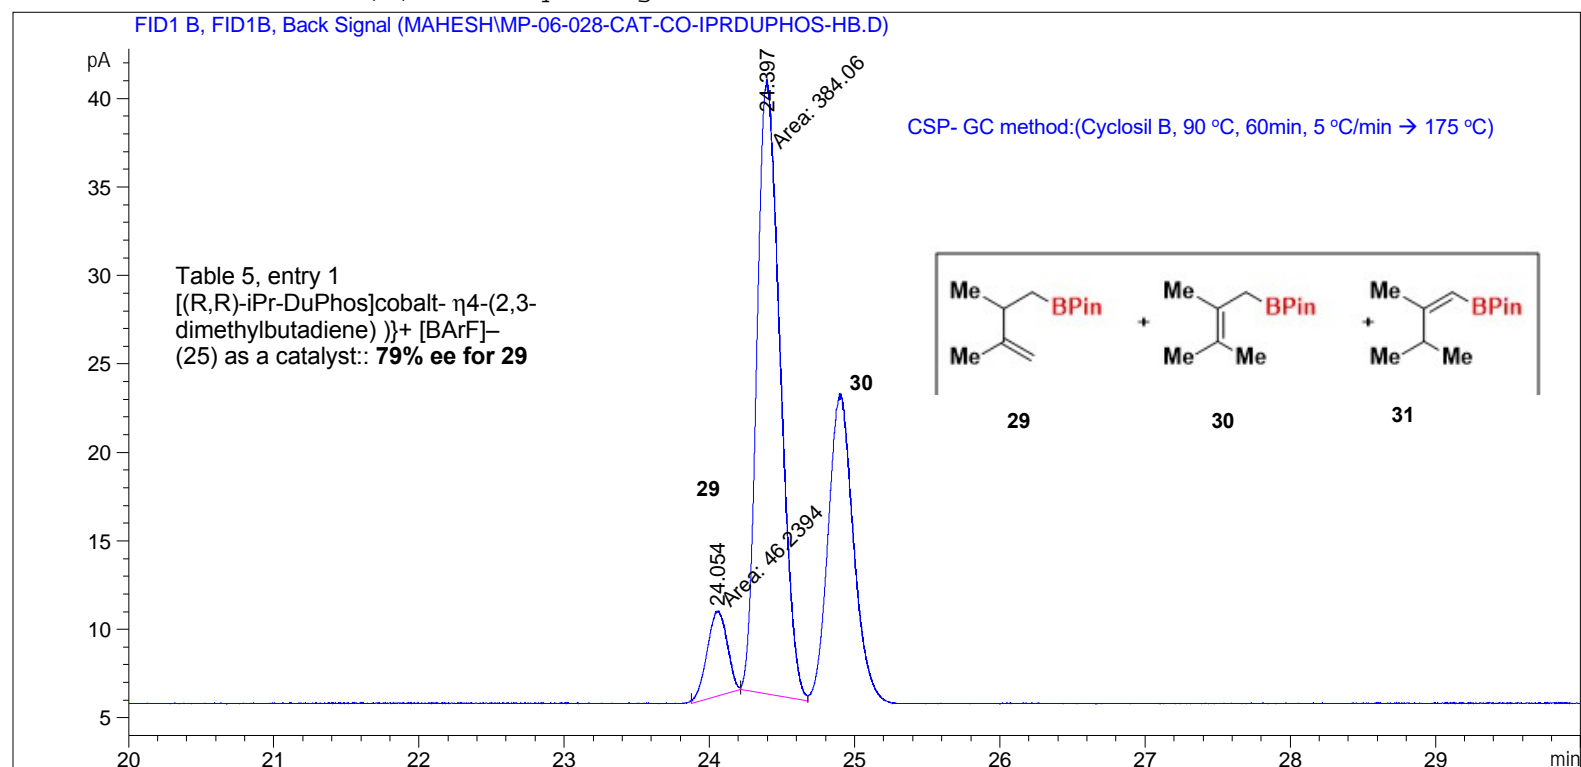

```

=====
                          Area Percent Report
=====
  
```

```

Sorted By      :      Signal
Multiplier:    :      1.0000
Dilution:     :      1.0000
Sample Amount: :      1.00000 [ng/ul] (not used in calc.)
Use Multiplier & Dilution Factor with ISTDs
  
```

Signal 1: FID1 B, FID1B, Back Signal

| Peak # | RetTime [min] | Type | Width [min] | Area [pA*s] | Height [pA] | Area %   |
|--------|---------------|------|-------------|-------------|-------------|----------|
| 1      | 24.054        | MM   | 0.1600      | 46.23942    | 4.81647     | 10.74587 |
| 2      | 24.397        | MM   | 0.1847      | 384.05994   | 34.65346    | 89.25413 |

Totals : 430.29936 39.46993

=====  
\*\*\* End of Report \*\*\*

Sample Name: MP-06-028-COL-1EQ.D

```

=====
Acq. Operator   : mp
Acq. Instrument : Instrument 1
Injection Date  : 6/23/2020 5:53:05 PM
Location        : Vial 3
Inj Volume     : 1 µl

Acq. Method    : C:\CHEM32\1\METHODS\50-RAMP.M
Last changed   : 6/23/2020 5:47:10 PM by mp
Analysis Method : C:\CHEM32\1\METHODS\MP-80-RAMP.M
Last changed   : 7/18/2020 2:29:03 PM by Jon
                (modified after loading)
Method Info    : General Higher BP that correlates to Stambuli Group's GCMS - 30 min
  
```

Additional Info : Peak(s) manually integrated

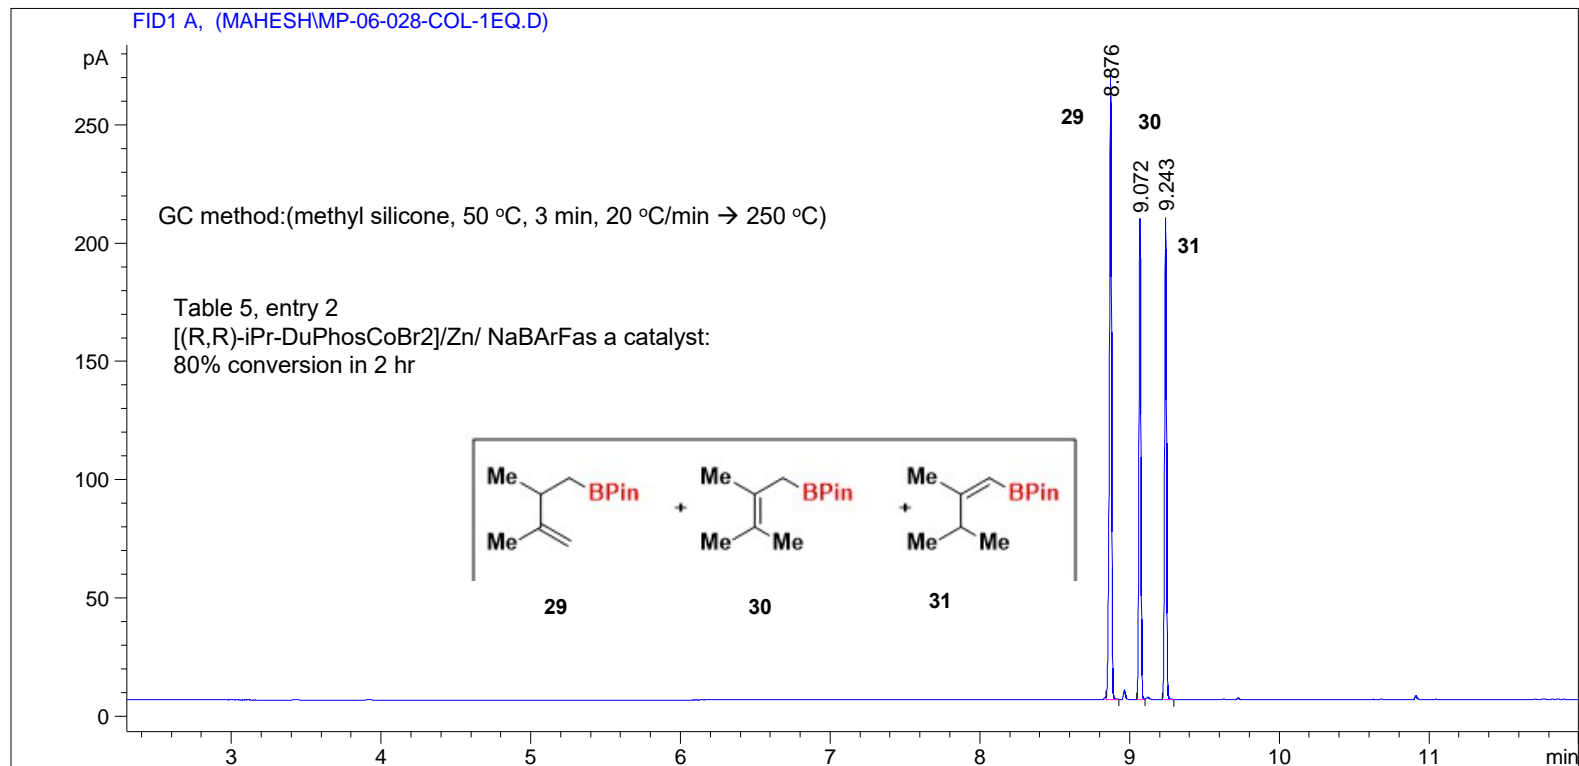

```

=====
Area Percent Report
=====
  
```

```

Sorted By      :      Signal
Multiplier:    :      1.0000
Dilution:      :      1.0000
Use Multiplier & Dilution Factor with ISTDs
  
```

Signal 1: FID1 A,

| Peak # | RetTime [min] | Type | Width [min] | Area [pA*s] | Height [pA] | Area %   |
|--------|---------------|------|-------------|-------------|-------------|----------|
| 1      | 8.876         | VB   | 0.0151      | 261.94107   | 263.63089   | 42.54850 |
| 2      | 9.072         | BV   | 0.0137      | 177.83084   | 203.36923   | 28.88602 |

S109

Sample Name: MP-06-028-COL-1EQ.D

| Peak # | RetTime [min] | Type | Width [min] | Area [pA*s] | Height [pA] | Area %   |
|--------|---------------|------|-------------|-------------|-------------|----------|
| 3      | 9.243         | BB   | 0.0136      | 175.85747   | 204.12392   | 28.56548 |

Totals :                                   615.62938   671.12404

=====  
\*\*\* End of Report \*\*\*
